# Supplementary material
Source: PubMed Central journal article supplement (PMC8048766)

*Stereoretentive Pd-Catalyzed Cross-Coupling Reactions of Secondary Alkyl Azastannatranes and Aryl Halides*

Ling Li, Chao-Yuan Wang, Rongcai Huang, and Mark R. Biscoe

**Supporting Information**

**Table of Contents**

|                                                          |                |
|----------------------------------------------------------|----------------|
| <b>General Reagent/Analytical Information.....</b>       | <b>S2</b>      |
| <b>Procedural Information.....</b>                       | <b>S2-S4</b>   |
| <b>Crystal Structure of 11.....</b>                      | <b>S4</b>      |
| <b>Compound Characterization Data.....</b>               | <b>S5-S18</b>  |
| <b>References.....</b>                                   | <b>S18</b>     |
| <b>Chiral GC and HPLC data.....</b>                      | <b>S19-S24</b> |
| <b><sup>1</sup>H and <sup>13</sup>C NMR Spectra.....</b> | <b>S26-S64</b> |

## General Reagent Information

BDH brand ethyl ether was purchased from VWR. EMD brand Omnisolv THF (unstabilized) was also purchased from VWR. These solvents were transferred to separate 20 L solvent-delivery kegs and vigorously purged with argon for 2 h. The solvents were further purified by passing them under argon pressure through two packed columns of neutral alumina. *s*-BuLi (1.4 M in cyclohexane), isopropylmagnesium chloride (2.0 M in ether), and 5-chloro-1-aza-5-stannabicyclo[3.3.3]undecane were purchased from SigmaAldrich. Pd(dba)<sub>2</sub> and JackiePhos were purchased from Strem. Acetonitrile (Sigma-Aldrich) was purged with argon prior to use. Grignard reagents were prepared from their corresponding alkyl chlorides or bromides using a literature procedure.<sup>1</sup> Molarities of Grignard reagents and zinc reagents were determined using iodine titration.<sup>2</sup> Optically active organostannatranes were prepared via preparatory chiral HPLC. Reagents and solvents were used as received unless otherwise noted. Flash chromatography was performed using Silicycle silica gel (ultra pure grade).

## General Analytical Information

All compounds were characterized by <sup>1</sup>H NMR and <sup>13</sup>C NMR spectroscopy. Copies of the <sup>1</sup>H and <sup>13</sup>C spectra for all new compounds can be found at the end of the Supporting Information. All previously unreported compounds were additionally characterized by high resolution MS. Nuclear Magnetic Resonance spectra were recorded on a Varian 300 or 500 MHz instrument. All <sup>1</sup>H NMR experiments are reported in δ units, parts per million (ppm), and were measured relative to the signals for residual chloroform (7.26 ppm). All <sup>13</sup>C NMR spectra are reported in ppm relative to deuteriochloroform (77.23 ppm), and were obtained with <sup>1</sup>H decoupling. High resolution MS analyses were performed on an Agilent 6520 Q-TOF instrument. All GC analyses were performed on a Shimadzu GC-2010 gas chromatograph with an FID detector using a 25 m x 0.20 mm capillary column with cross-linked methyl siloxane as the stationary phase, or using a 30 m x 0.32 mm chiral column (Rt<sup>®</sup>-βDEXsm from RESTEK). All GC yields were calibrated using dodecane as an internal standard. Chiral HPLC analyses were performed by Chiral Technologies Inc using an OZ-H or OJ-H chiral column. ICP-MS analysis was performed by Exova Inc.

## Procedural Information

### *General procedure for the preparation of secondary alkyl azastannatranes*

All reactions were performed in oven-dried glassware under an atmosphere of Ar. *sec*-Butyllithium or *sec*-alkyl Grignard reagents (1.5–2.0 equiv.) were added to the suspension of 5-chloro-1-aza-5-stannabicyclo[3.3.3]undecane (**4b**) (1 equiv.) in anhydrous solvent at -78 °C. The resulting mixture was stirred at -78 °C for 3 h, allowed to warm to room temperature, and stirred overnight. The reaction mixture was poured into a separatory funnel containing a mixture of water and ether. The organic layer was

separated, washed with brine, dried over  $\text{Na}_2\text{SO}_4$ , and filtered. Solvent was removed under reduced pressure and dried *in vacuo* to provide the crude product. The crude secondary alkyl tin reagents were used without further purification. Homocoupling from Grignard formation constituted the major residual byproduct in the crude product.

#### *General procedure for cross-coupling reactions*

$\text{Pd}(\text{dba})_2$  (5 mol %, 14.4 mg for 0.5 mmol scale and 28.8 mg for 1.0 mmol scale), JackiePhos (6-10 mol %),  $\text{CuCl}$  (2 equiv, 100 mg for 0.5 mmol scale and 200 mg for 1.0 mmol scale) and  $\text{KF}$  (2 equiv, 58 mg for 0.5 mmol scale and 116 mg for 1.0 mmol scale) were weighed out on the benchtop, and transferred to an oven-dried Schlenk tube with stir bar. With stirring begun, the Schlenk tube was evacuated (50 mTorr) and backfilled three times with argon using a needle attached to a vacuum manifold. The tin reagent (1.1-2.0 equiv) and aryl halide/triflate (1 equiv) was then added to the Schlenk tube via microsyringe, followed by degassed  $\text{CH}_3\text{CN}$  (3 mL for 0.5-1.0 mmol scale). If the aryl halide/triflate or the tin reagent was a solid, it was weighed out on the benchtop alongside the other solids. The Schlenk tube was sealed with a Teflon stopper and heated to  $60\text{ }^\circ\text{C}$  for 18 h (unoptimized reaction time). The reaction mixture was cooled to rt, diluted with ether, washed sequentially with saturated aqueous  $\text{KF}$  and brine, and dried over  $\text{Na}_2\text{SO}_4$ . The reaction solution was filtered and concentrated to provide the crude product. The crude product was purified by column chromatography.

#### *Synthesis of 11 for absolute configuration determination via x-ray crystallography*

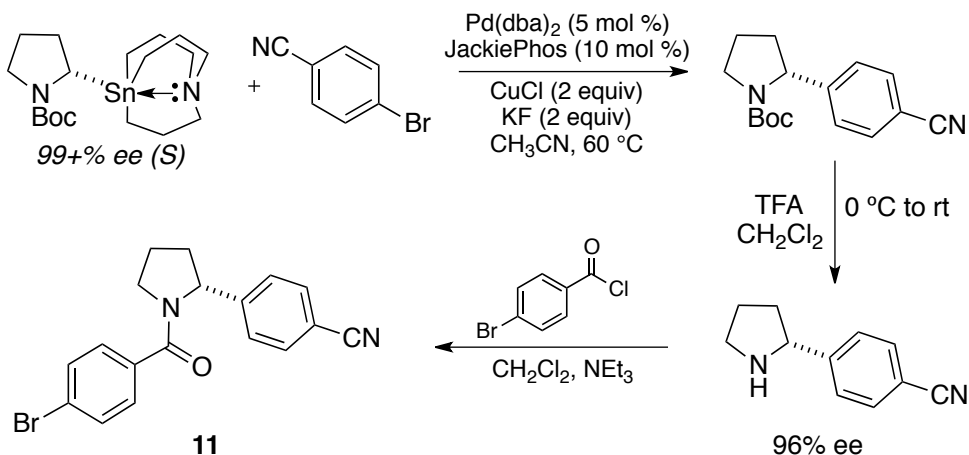

## Single Crystal Structure Determination

### *Experimental Description*

A colorless slab-like crystal (grown by slow evaporation from ether at -20 °C) with the size of  $0.05 \times 0.20 \times 0.54 \text{ mm}^3$  was selected for geometry and intensity data collection with a Bruker SMART APEXII CCD area detector on a D8 goniometer at 100 K. The temperature during the data collection was controlled with an Oxford Cryosystems Series 700+ instrument. Preliminary lattice parameters and orientation matrices were obtained from three sets of frames. Data were collected using graphite-monochromated and 0.5 mm-MonoCap-collimated Mo-K $\alpha$  radiation ( $\lambda = 0.71073 \text{ \AA}$ ) with the  $\omega$  scan method.<sup>3</sup> Data were processed with the INTEGRATE program of the APEX2 software<sup>3</sup> for reduction and cell refinement. Multi-scan absorption corrections were applied by using the SCALE program for the area detector. The structure was solved by the direct method and refined on  $F^2$  (SHELXTL).<sup>4</sup> Non-hydrogen atoms were refined with anisotropic displacement parameters, and hydrogen atoms on carbons were placed in idealized positions (C-H = 0.95-1.00  $\text{\AA}$ ) and included as riding with  $U_{\text{iso}}(\text{H}) = 1.2 U_{\text{eq}}(\text{non-H})$ , and the hydrogen atoms on the oxygen atoms were refined with a restrained O-H distance of 0.83  $\text{\AA}$ .

### *Crystal Structure of II*

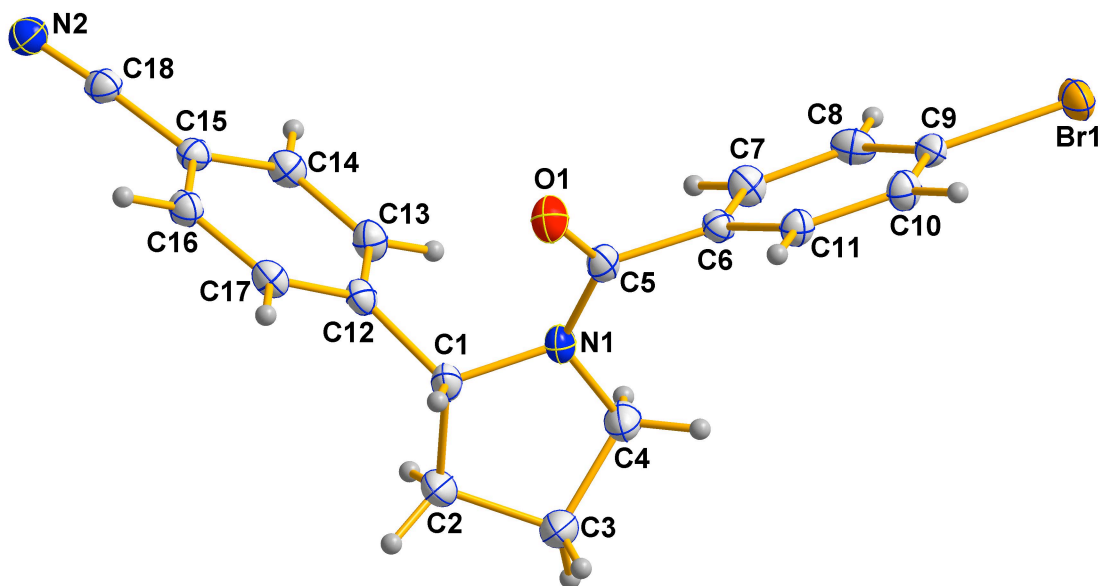

## Compound Characterization

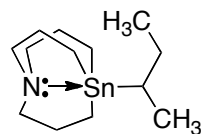

**5-(*sec*-Butyl)-1-aza-5-stannabicyclo[3.3.3]undecane (6).**<sup>5</sup> The general procedure was employed using 5-chloro-1-aza-5-stannabicyclo[3.3.3]undecane (2.94 g, 10.2 mmol) in ether (40 mL), and *s*-BuLi (1.4 M in cyclohexane, 15 mL, 21.0 mmol). A yellow oil (3.18 g, 99%) was isolated. <sup>1</sup>H NMR (500 MHz, CDCl<sub>3</sub>): δ 2.35 (t, *J* = 6.0 Hz, 6H), 1.64 (quint, *J* = 6.0 Hz, 6H), 1.41-1.51 (m, 2H), 1.05 (d, *J* = 7.5 Hz, 3H), 0.86 (t, *J* = 7.5 Hz, 3H), 0.66 (m, 1H), 0.63 (t, *J* = 6.5 Hz, 6H) ppm. <sup>13</sup>C NMR (125 MHz, CDCl<sub>3</sub>): δ 55.0, 29.4, 26.7, 23.7, 18.5, 14.8, 5.7 ppm.

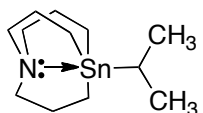

**5-(*iso*-Propyl)-1-aza-5-stannabicyclo[3.3.3]undecane.** The general procedure was employed using 5-chloro-1-aza-5-stannabicyclo[3.3.3]undecane (1.47 g, 5.0 mmol) in ether (20 mL), and isopropylmagnesium chloride (2.0 M in ether, 5.0 mL, 10.0 mmol). A yellow oil (1.41 g, 95%) was isolated. <sup>1</sup>H NMR (500 MHz, CDCl<sub>3</sub>): δ 2.35 (t, *J* = 6.0 Hz, 6H), 1.64 (quint, *J* = 6.0 Hz, 6H), 1.06 (d, *J* = 7.5 Hz, 6H), 0.70 (m, 1H), 0.62 (t, *J* = 6.5 Hz, 6H) ppm. <sup>13</sup>C NMR (125 MHz, CDCl<sub>3</sub>): δ 54.9, 23.6, 21.6, 17.7, 4.6 ppm. HRMS (FAB<sup>+</sup>): Calcd (<sup>116</sup>Sn) (M-H)<sup>+</sup> 298.0926; Found (<sup>116</sup>Sn) 298.0929.

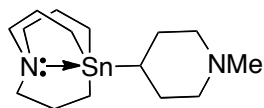

**5-(1-Methylpiperidin-4-yl)-1-aza-5-stannabicyclo[3.3.3]undecane.** The general procedure was employed using 5-chloro-1-aza-5-stannabicyclo[3.3.3]undecane (1.06 g, 3.6 mmol) in THF (36 mL), and (1-methylpiperidin-4-yl)magnesium chloride (0.78 M in THF, 7 mL, 5.5 mmol). A pale yellow solid (1.25 g, 97%) was isolated. <sup>1</sup>H NMR (500 MHz, CDCl<sub>3</sub>): δ 2.76 (d, *J* = 9.0 Hz, 2H), 2.34 (t, *J* = 6.0 Hz, 6H), 2.19 (s, 3H), 1.55-1.79 (m, 13H), 0.63 (t, *J* = 6.5 Hz, 6H) ppm. <sup>13</sup>C NMR (125 MHz, CDCl<sub>3</sub>): δ 59.0, 54.8, 47.3, 30.8, 26.2, 23.5, 4.7 ppm. HRMS (FAB<sup>+</sup>): Calcd (<sup>116</sup>Sn) (M-H)<sup>+</sup> 353.1348; Found (<sup>116</sup>Sn) 353.1356.

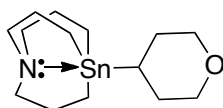

**5-(Tetrahydro-2H-pyran-4-yl)-1-aza-5-stannabicyclo[3.3.3]undecane.** The general procedure was employed using 5-chloro-1-aza-5-stannabicyclo[3.3.3]undecane (883 mg, 3.0 mmol) in THF (30 mL), and (tetrahydro-2H-pyran-4-yl)magnesium chloride (0.62 M in THF, 7 mL, 4.3 mmol). A pale yellow solid (983 mg, 95%) was isolated.  $^1\text{H}$  NMR (500 MHz,  $\text{CDCl}_3$ ):  $\delta$  3.87 (m, 2H), 3.33 (dt,  $J = 11.0, 2.0$  Hz, 2H), 2.36 (t,  $J = 6$  Hz, 6H), 1.64 (quint,  $J = 6.0$  Hz, 6H), 1.50-1.65 (m, 4H), 0.90 (tt,  $J = 12.5, 4.0$  Hz, 1H), 0.64 (t,  $J = 6.5$  Hz, 6H) ppm.  $^{13}\text{C}$  NMR (125 MHz,  $\text{CDCl}_3$ ):  $\delta$  71.0, 54.8, 31.3, 26.0, 23.4, 4.6 ppm. HRMS (FAB $^+$ ): Calcd ( $^{116}\text{Sn}$ ) (M-H) $^+$  340.1031; Found ( $^{116}\text{Sn}$ ) 340.1025.

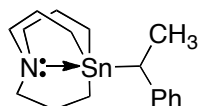

**5-(1-Phenylethyl)-1-aza-5-stannabicyclo[3.3.3]undecane.** The general procedure was employed using 5-chloro-1-aza-5-stannabicyclo[3.3.3]undecane (882 mg, 3.0 mmol) in THF (15 mL), and (1-phenylethyl)magnesium chloride (0.56 M in THF, 8 mL, 4.5 mmol). A yellow liquid (995 mg, 91%) was isolated.  $^1\text{H}$  NMR (500 MHz,  $\text{CDCl}_3$ ):  $\delta$  7.15 (t,  $J = 7.5$  Hz, 2H), 6.90-7.00 (m, 3H), 2.30 (t,  $J = 6.0$  Hz, 6H), 2.21 (quart,  $J = 7.5$  Hz, 1H), 1.61 (quint,  $J = 6.0$  Hz, 6H), 1.44 (d,  $J = 7.5$  Hz, 3H), 0.61 (dt,  $J = 6.5, 3$  Hz, 6H) ppm.  $^{13}\text{C}$  NMR (125 MHz,  $\text{CDCl}_3$ ):  $\delta$  151.5, 128.0, 124.9, 121.7, 54.7, 32.7, 23.5, 16.7, 5.3 ppm. HRMS (FAB $^+$ ): Calcd ( $^{116}\text{Sn}$ ) (M-H) $^+$  360.1082; Found ( $^{116}\text{Sn}$ ) 360.1072.

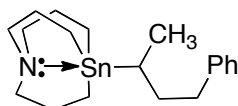

**5-(4-Phenylbutan-2-yl)-1-aza-5-stannabicyclo[3.3.3]undecane (12).** The general procedure was employed using 5-chloro-1-aza-5-stannabicyclo[3.3.3]undecane (1.65 g, 5.6 mmol) in THF (50 mL), and (4-phenylbutan-2-yl)magnesium chloride (0.28 M in THF, 23 mL, 6.4 mmol). A yellow liquid (1.74 g, 79%) was isolated.  $^1\text{H}$  NMR (500 MHz,  $\text{CDCl}_3$ ):  $\delta$  7.25-7.28 (m, 2H), 7.16-7.19 (m, 3H), 2.50-2.65 (m, 2H), 2.36 (t,  $J = 6.0$  Hz, 6H), 1.68-1.81 (m, 2H), 1.65 (quint,  $J = 6.0$  Hz, 6H), 1.13 (d,  $J = 7.5$  Hz, 3H), 0.79 (quart,  $J = 7.5$  Hz, 1H), 0.67 (t,  $J = 6.5$  Hz, 6H) ppm.  $^{13}\text{C}$  NMR (125 MHz,  $\text{CDCl}_3$ ):  $\delta$  143.9, 128.6, 128.3, 125.5, 55.0, 39.0, 36.5, 24.2, 23.6, 18.6, 5.6 ppm. HRMS (FAB $^+$ ): Calcd ( $^{116}\text{Sn}$ ) (M-H) $^+$  388.1396; Found ( $^{116}\text{Sn}$ ) 388.1409. Enantiomeric separation was achieved using a Chiralcel OJ-H chiral column with 95:5 MeOH:H $_2$ O as eluent (see chiral HPLC data below).

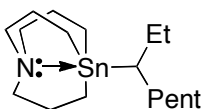

**5-(Octan-3-yl)-1-aza-5-stannabicyclo[3.3.3]undecane.** The general procedure was employed using 5-chloro-1-aza-5-stannabicyclo[3.3.3]undecane (736 mg, 2.5 mmol) in THF (25 mL), and octan-3-ylmagnesium chloride (0.35 M in THF, 11 mL, 3.8 mmol). A colorless liquid (1.074 g, > 100%) was isolated.  $^1\text{H}$  NMR (500 MHz,  $\text{CDCl}_3$ ):  $\delta$  2.36 (t,  $J = 6.0$  Hz, 6H), 1.64 (quint,  $J = 6.0$  Hz, 6H), 1.20-1.52 (m, 10H), 0.88 (t,  $J = 7.0$  Hz, 3H), 0.84 (t,  $J = 7.5$  Hz, 3H), 0.74 (m, 1H), 0.64 (t,  $J = 6.5$  Hz, 6H) ppm.  $^{13}\text{C}$  NMR (125 MHz,  $\text{CDCl}_3$ ):  $\delta$  55.1, 34.0, 33.3, 32.6, 29.9, 26.3, 23.8, 23.0, 14.7, 14.4, 6.9 ppm. HRMS ( $\text{FAB}^+$ ): Calcd ( $^{116}\text{Sn}$ ) (M-H) $^+$  368.1708; Found ( $^{116}\text{Sn}$ ) 368.1698.

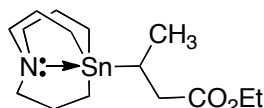

**Ethyl 3-(1-aza-5-stannabicyclo[3.3.3]undecan-5-yl)butanoate.** The general procedure was employed using 5-chloro-1-aza-5-stannabicyclo[3.3.3]undecane (882 mg, 3.0 mmol) in DMF (8 mL), and (4-ethoxy-4-oxobutan-2-yl)zinc iodide (0.61 M in DMF, 10 mL, 6.1 mmol). An orange oil (509 mg, 45%) was isolated.  $^1\text{H}$  NMR (500 MHz,  $\text{CDCl}_3$ ):  $\delta$  4.09 (quart,  $J = 7.0$  Hz, 2H), 2.40 (m, 1H), 2.35 (t,  $J = 6.0$  Hz, 6H), 2.25 (m, 1H), 1.64 (quint,  $J = 6$  Hz, 6H), 1.24 (t,  $J = 7.0$  Hz, 3H), 1.02-1.13 (m, 4H), 0.65 (t,  $J = 6.5$  Hz, 6H) ppm.  $^{13}\text{C}$  NMR (125 MHz,  $\text{CDCl}_3$ ):  $\delta$  175.5, 60.0, 54.9, 40.7, 23.5, 19.8, 18.4, 14.6, 5.2 ppm. HRMS ( $\text{FAB}^+$ ): Calcd ( $^{116}\text{Sn}$ ) (M-H) $^+$  370.1138; Found ( $^{116}\text{Sn}$ ) 370.1136.

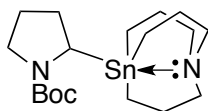

**tert-Butyl 2-(1-aza-5-stannabicyclo[3.3.3]undecan-5-yl)pyrrolidine-1-carboxylate.** TMEDA (0.8 mL, 5.5 mmol) in ether (1 mL) was precooled to  $-78$  °C for 15 min. *s*-BuLi (1.4 M in cyclohexane, 3.6 mL, 5.0 mmol) was added dropwise to this solution. The resulting solution was allowed to stir for 15 min. A solution of *N*-Boc-pyrrolidine (855 mg, 5.0 mmol) in ether (10 mL) was then added dropwise. This reaction mixture was stirred at  $-78$  °C for 3h. The resulting solution (1-*tert*-butoxycarbonyl)pyrrolidin-2-yl)lithium (0.22 M in ether, 17 mL, 3.7 mmol)<sup>6</sup> was employed in the general procedure with 5-chloro-1-aza-5-stannabicyclo[3.3.3]undecane (736 mg, 2.5 mmol) in ether (25 mL). A yellow oil (854 mg, 80%) was isolated.  $^1\text{H}$  NMR for two rotomers with a ratio of 3:2 (500 MHz,  $\text{CDCl}_3$ ):  $\delta$  3.01-3.34 (m, 2H), 2.32-2.38 (m, 6H), 2.01-2.21 (m, 1H), 1.63-1.70 (m, 10H), 1.43-1.47 (two singlet, 9H), 0.70-0.73 (m, 6H) ppm.  $^{13}\text{C}$  NMR for the major rotomer (125 MHz,  $\text{CDCl}_3$ ):  $\delta$  154.0, 77.9, 55.2, 51.4, 46.7, 30.3, 28.9, 27.2, 23.7, 7.0 ppm. HRMS ( $\text{FAB}^+$ ): Calcd ( $^{116}\text{Sn}$ ) (M-H) $^+$  425.1559; Found ( $^{116}\text{Sn}$ ) 425.1560.

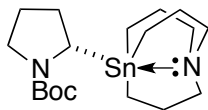

**(S)-tert-Butyl 2-(1-aza-5-stannabicyclo[3.3.3]undecan-5-yl)pyrrolidine-1-carboxylate (10).** (-)-Sparteine (258 mg, 1.1 mmol) in ether (1 mL) was precooled to -78 °C for 15 min. *s*-BuLi (1.4 M in cyclohexane, 0.8 mL, 1.1 mmol) was added dropwise to the solution. The resulting solution was allowed to stir for 15 min. A solution of *N*-Boc-pyrrolidine (171 mg, 1.0 mmol) in ether (2 mL) was then added dropwise. This mixture was stirred at -78 °C for 3 h. The resulting (1-*tert*-butoxycarbonyl)pyrrolidin-2-yl)lithium solution (0.23 M in ether, 4 mL, 0.9 mmol)<sup>6</sup> was employed in the general procedure with 5-chloro-1-aza-5-stannabicyclo[3.3.3]undecane (176 mg, 0.6 mmol) in ether (6 mL), and (1-*tert*-butoxycarbonyl)pyrrolidin-2-yl)lithium. A yellow oil (160 mg, 62%, 93% ee) was isolated. <sup>1</sup>H NMR for two rotomers with a ratio of 3:2 (500 MHz, CDCl<sub>3</sub>): δ 3.01-3.34 (m, 2H), 2.32-2.38 (m, 6H), 2.01-2.21 (m, 1H), 1.63-1.70 (m, 10H), 1.43-1.47 (two singlet, 9H), 0.70-0.73 (m, 6H) ppm. <sup>13</sup>C NMR for the major rotomer (125 MHz, CDCl<sub>3</sub>): δ 154.0, 77.9, 55.2, 51.4, 46.7, 30.3, 28.9, 27.2, 23.7, 7.0 ppm. Preparative enantiomeric separation could also be achieved using a Chiralcel OZ-H chiral column with CH<sub>3</sub>CN as eluent (see chiral HPLC data below).

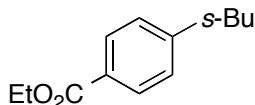

**Ethyl 4-(*sec*-butyl)benzoate<sup>7</sup> (7b)** (Table 1, row 1, column 1). The general procedure was employed using ethyl 4-bromobenzoate (229 mg, 1 mmol), 5-(*sec*-butyl)-1-aza-5-stannabicyclo[3.3.3]undecane (348 mg, 1.1 mmol), and JackiePhos (48 mg, 0.06 mmol). A colorless liquid (180 mg, 87%) was isolated by column chromatography (98:2 Hex/EtOAc). <sup>1</sup>H NMR (500 MHz, CDCl<sub>3</sub>): δ 7.97 (d, *J* = 8.0 Hz, 2H), 7.24 (d, *J* = 8.0 Hz, 2H), 4.36 (quartet, *J* = 7.0 Hz, 2H), 2.65 (m, 1H), 1.61 (m, 2H), 1.38 (t, *J* = 7.0 Hz, 3H), 1.24 (d, *J* = 6.5 Hz, 3H), 0.81 (t, *J* = 7.5 Hz, 3H) ppm. <sup>13</sup>C NMR (125 MHz, CDCl<sub>3</sub>): δ 166.8, 153.2, 129.8, 128.3, 127.2, 60.8, 41.9, 31.0, 21.7, 14.5, 12.3 ppm.

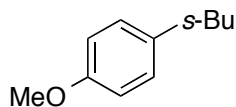

**1-(*sec*-Butyl)-4-methoxybenzene<sup>8</sup> (7c)** (Table 1, row 2, column 1). The general procedure was employed using 1-bromo-4-methoxybenzene (187 mg, 1 mmol), 5-(*sec*-butyl)-1-aza-5-stannabicyclo[3.3.3]undecane (475 mg, 1.5 mmol), and JackiePhos (80 mg, 0.1 mmol). A colorless liquid (124.7 mg, 77%) was isolated by column chromatography (97:3 Hex/EtOAc). <sup>1</sup>H NMR (500 MHz, CDCl<sub>3</sub>): δ 7.11 (d, *J* = 8.5, 2H), 6.86 (d, *J* = 8.5 Hz, 2H), 3.80 (s, 3H), 2.56 (m, 1H), 1.58 (m, 2H), 1.23 (d, *J* = 7 Hz, 3H),



0.83 (t,  $J = 7.0$  Hz, 3H) ppm.  $^{13}\text{C}$  NMR (125 MHz,  $\text{CDCl}_3$ ):  $\delta$  157.9, 140.0, 128.0, 113.8, 55.4, 41.0, 31.5, 22.2, 12.4 ppm.

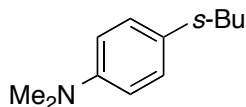

**4-(*sec*-Butyl)-*N,N*-dimethylaniline**<sup>9</sup> (**7d**) (Table 1, row 3, column 1). The general procedure was employed using 4-bromo-*N,N*-dimethylaniline (200 mg, 1 mmol), 5-(*sec*-butyl)-1-aza-5-stannabicyclo[3.3.3]undecane (475 mg, 1.5 mmol), and JackiePhos (80 mg, 0.1 mmol). An oily, brown solid (110 mg, 62%) was isolated by column chromatography (99:1 Hex/EtOAc).  $^1\text{H}$  NMR (500 MHz,  $\text{CDCl}_3$ ):  $\delta$  7.08 (d,  $J = 8.5$  Hz, 2H), 6.73 (d,  $J = 8.5$  Hz, 2H), 2.93 (s, 6H), 2.52 (m, 1H), 1.57 (m, 2H), 1.22 (d,  $J = 7.0$  Hz, 3H), 0.84 (t,  $J = 7.5$  Hz, 3H) ppm.  $^{13}\text{C}$  NMR (125 MHz,  $\text{CDCl}_3$ ):  $\delta$  149.2, 136.2, 127.8, 113.1, 41.1, 40.8, 31.6, 22.2, 12.5 ppm.

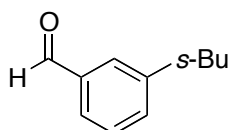

**3-(*sec*-Butyl)benzaldehyde** (**7e**) (Table 1, row 4, column 1). The general procedure was employed using 3-bromobenzaldehyde (185 mg, 1 mmol), 5-(*sec*-butyl)-1-aza-5-stannabicyclo[3.3.3]undecane (348 mg, 1.1 mmol), and JackiePhos (48 mg, 0.06 mmol). A oily, yellow liquid (120.1 mg, 74%) was isolated by column chromatography (98.5:1.5 Hex/Ether).  $^1\text{H}$  NMR (500 MHz,  $\text{CDCl}_3$ ):  $\delta$  10.00 (s, 1H), 7.70 (m, 2H), 7.46 (m, 2H), 7.04 (s, 1H), 2.69 (m, 1H), 1.63 (m, 2H), 1.27 (d,  $J = 7$  Hz, 3H), 0.83 (t,  $J = 7.5$  Hz, 3H) ppm.  $^{13}\text{C}$  NMR (125 MHz,  $\text{CDCl}_3$ ):  $\delta$  192.8, 149.0, 136.8, 133.7, 129.1, 128.2, 128.0, 41.7, 31.2, 21.9, 12.3 ppm. HRMS ( $\text{EI}^+$ ): Calcd ( $M^+$ ) 162.1045; Found 162.1047.

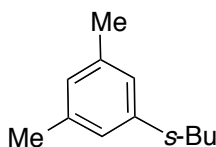

**1-(*sec*-Butyl)-3,5-dimethylbenzene**<sup>8</sup> (**7f**) (Table 1, row 5, column 1). The general procedure was employed using 1-bromo-3,5-dimethylbenzene (185 mg, 1 mmol), 5-(*sec*-butyl)-1-aza-5-stannabicyclo[3.3.3]undecane (475 mg, 1.5 mmol), and JackiePhos (80 mg, 0.1 mmol). A colorless liquid (128 mg, 77%) was isolated by column chromatography (97.5:2.5 Hex/Ether).  $^1\text{H}$  NMR (500 MHz,  $\text{CDCl}_3$ ):  $\delta$  6.84 (s, 1H), 6.82 (s, 2H), 2.52 (m, 1H), 2.31 (s, 6H), 1.59 (m, 2H), 1.22 (d,  $J = 6.5$  Hz, 3H), 0.84 (t,  $J = 7.0$  Hz, 3H) ppm.  $^{13}\text{C}$  NMR (125 MHz,  $\text{CDCl}_3$ ):  $\delta$  160.5, 148, 137.8, 125.1, 41.8, 31.4, 22.1, 21.6, 12.6 ppm.

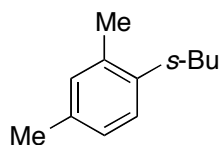

**1-(*sec*-Butyl)-2,4-dimethylbenzene<sup>10</sup> (7g)** (Table 1, row 1, column 2). The general procedure was employed using 1-bromo-2,4-dimethylbenzene (185 mg, 1 mmol), 5-(*sec*-butyl)-1-aza-5-stannabicyclo[3.3.3]undecane (475 mg, 1.5 mmol), and JackiePhos (80 mg, 0.1 mmol). A colorless liquid (125 mg, 74%) was isolated by column chromatography (97.5:2.5 Hex/Ether). <sup>1</sup>H NMR (500 MHz, CDCl<sub>3</sub>): δ 7.08 (d, *J* = 8 Hz, 1H), 6.98 (m, 2H), 2.84 (m, 1H), 2.29 (s, 6H), 1.58 (m, 2H), 1.18 (d, *J* = 6.5 Hz, 3H), 0.86 (t, *J* = 7.5 Hz, 3H) ppm. <sup>13</sup>C NMR (125 MHz, CDCl<sub>3</sub>): δ 143.1, 135.5, 134.9, 131.2, 127.0, 125.4, 36.1, 30.8, 21.5, 21.1, 19.7, 12.5 ppm.

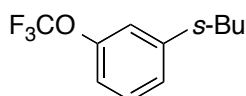

**1-(*sec*-Butyl)-3-(trifluoromethoxy)benzene (7h)** (Table 1, row 2, column 2). The general procedure was employed using bromo-3-(trifluoromethoxy)benzene (241 mg, 1 mmol), 5-(*sec*-butyl)-1-aza-5-stannabicyclo[3.3.3]undecane (348 mg, 1.1 mmol), JackiePhos (48 mg, 0.06 mmol). A colorless liquid (152.4, 73%) was isolated by column chromatography (98.5:1.5 Hex/Ether). <sup>1</sup>H NMR (500 MHz CDCl<sub>3</sub>): δ 7.30 (t, *J* = 7.5 Hz, 1H), 7.18 (d, *J* = 7.5 Hz, 1H), 7.03 (d, *J* = 7.5 Hz, 1H), 7.02 (s, 1H), 2.62 (m, 1H), 1.59 (m, 2H), 1.24 (d, *J* = 6.5 Hz, 3H), 0.83 (t, *J* = 7.5 Hz, 3H) ppm. <sup>13</sup>C NMR (125 MHz, CDCl<sub>3</sub>): δ 150.3, 142.0, 129.7, 125.7, 120.5, 119.8, 118.3, 41.7, 31.2, 21.8, 12.3 ppm. HRMS (EI<sup>+</sup>): Calcd (M<sup>+</sup>) 218.0918; Found 218.0919.

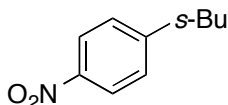

**1-(*sec*-Butyl)-4-nitrobenzene<sup>11</sup> (7i)** (Table 1, row 3, column 2). The general procedure was employed using 1-chloro-4-nitrobenzene (158 mg, 1 mmol), 5-(*sec*-butyl)-1-aza-5-stannabicyclo[3.3.3]undecane (475 mg, 1.5 mmol), and JackiePhos (80 mg, 0.1 mmol). An oily, yellow liquid (168 mg, 93%) was isolated by column chromatography (99:1 Hex/Ether). <sup>1</sup>H NMR (500 MHz, CDCl<sub>3</sub>): δ 8.15 (d, *J* = 9 Hz, 2H), 7.33 (d, *J* = 8.5 Hz, 2H), 2.73 (m, 1H), 1.63 (m, 2H), 1.27 (d, *J* = 7 Hz, 3H), 0.83 (t, *J* = 7.5 Hz, 3H) ppm. <sup>13</sup>C NMR (125 MHz, CDCl<sub>3</sub>): δ 155.7, 146.5, 128.1, 123.8, 42.0, 31.1, 21.7, 12.3 ppm.

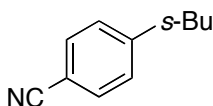

**4-(*sec*-Butyl)benzonitrile<sup>9</sup> (7j)** (Table 1, row 4, column 2). The general procedure was employed using 4-chlorobenzonitrile (138 mg, 1 mmol), 5-(*sec*-butyl)-1-aza-5-stannabicyclo[3.3.3]undecane (475 mg, 1.5 mmol), and JackiePhos (80 mg, 0.1 mmol). An oily, yellow solid (125.8 mg, 79%) was isolated by column chromatography (99:1 Hex/EtOAc). <sup>1</sup>H NMR (500 MHz, CDCl<sub>3</sub>): δ 7.59 (d, *J* = 8 Hz, 2H), 7.29 (d, *J* = 8.5 Hz, 2H), 2.67 (m, 1H), 1.61 (m, 2H), 1.25 (d, *J* = 7 Hz, 3H), 0.83 (t, *J* = 7.5 Hz, 3H) ppm. <sup>13</sup>C NMR (125 MHz, CDCl<sub>3</sub>): δ 153.5, 132.4, 128.1, 119.4, 109.8, 42.1, 31.0, 21.6, 12.2 ppm.

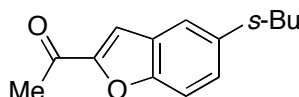

**2-Acetyl-5-(*sec*-butyl)benzofuran (7k)** (Table 1, row 5, column 2). The general procedure was employed using 2-Acetyl-5-bromobenzofuran (239 mg, 1 mmol), 5-(*sec*-butyl)-1-aza-5-stannabicyclo[3.3.3]undecane (348 mg, 1.1 mmol), and JackiePhos (48 mg, 0.06 mmol). A pale yellow solid (175 mg, 82%) was isolated by column chromatography (97:3 Hex/EtOAc). <sup>1</sup>H NMR (500 MHz, CDCl<sub>3</sub>): δ 7.46-7.50 (m, 3H), 7.31 (dd, *J* = 8.5, 2.0 Hz, 1H), 2.71 (m, 1H), 2.60 (s, 3H), 1.63 (m, 2H), 1.28 (d, *J* = 7 Hz, 3H), 0.83 (t, *J* = 7.5 Hz, 3H) ppm. <sup>13</sup>C NMR (125 MHz, CDCl<sub>3</sub>): δ 188.9, 165.3, 154.7, 143.8, 128.2, 127.3, 121.1, 113.3, 112.3, 41.8, 31.7, 26.6, 22.5, 12.4 ppm. HRMS (EI<sup>+</sup>): Calcd (M<sup>+</sup>) 216.1150; Found 216.1141.

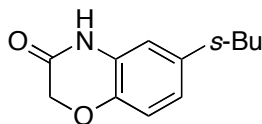

**6-(*sec*-Butyl)-2*H*-benzo[*b*][1,4]oxazin-3(4*H*)-one<sup>12</sup> (7l)** (Table 1, row 1, column 3). The general procedure was employed using 6-bromo-2*H*-benzo[*b*][1,4]oxazin-3(4*H*)-one (228 mg, 1 mmol), 5-(*sec*-butyl)-1-aza-5-stannabicyclo[3.3.3]undecane (475 mg, 1.5 mmol), and JackiePhos (80 mg, 0.1 mmol). A pale yellow solid (133 mg, 67%) was isolated by column chromatography (80:20 Hex/EtOAc). <sup>1</sup>H NMR (500 MHz, CDCl<sub>3</sub>): δ 9.43 (br s, 1H), 6.89 (d, *J* = 8 Hz, 1H), 6.79 (dd, *J* = 8, 2 Hz, 1H), 6.65 (s, 1H), 4.61 (s, 2H), 2.53 (m, 1H), 1.55 (m, 2H), 1.20 (d, *J* = 7 Hz, 3H), 0.81 (t, *J* = 7.5 Hz, 3H) ppm. <sup>13</sup>C NMR (125 MHz, CDCl<sub>3</sub>): δ 167.3, 142.8, 141.8, 126.0, 122.7, 116.5, 115.0, 67.3, 41.2, 31.3, 22.1, 12.4 ppm.

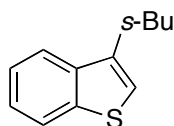

**3-(*sec*-Butyl)thionaphthene<sup>13</sup> (7m)** (Table 1, row 2, column 3). The general procedure was employed using 3-bromothionaphthene (213 mg, 1 mmol), 5-(*sec*-butyl)-1-aza-5-stannabicyclo[3.3.3]undecane (475 mg, 1.5 mmol), and JackiePhos (80 mg, 0.1 mmol). A colorless liquid (85.5 mg, 45%) was isolated by column chromatography (99:1 Hex/EtOAc). <sup>1</sup>H NMR (500 MHz, CDCl<sub>3</sub>): δ 7.87 (d, *J* = 7.5 Hz, 1H), 7.80 (d, *J* = 8 Hz, 1H), 7.37 (m, 2H), 7.09 (s, 1H), 3.12 (m, 1H), 1.86 (m, 1H), 1.68 (m, 1H), 1.37 (d, *J* = 7 Hz, 3H), 0.95 (t, *J* = 7.5 Hz, 3H) ppm. <sup>13</sup>C NMR (125 MHz, CDCl<sub>3</sub>): δ 142.7, 140.9, 139.0, 124.2, 123.8, 123.1, 122.1, 119.7, 34.8, 30.0, 20.5, 12.2 ppm.

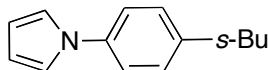

**1-(4-(*sec*-Butyl)phenyl)-1*H*-pyrrole<sup>8</sup> (7n)** (Table 1, row 3, column 3). The general procedure was employed using 1-(4-bromophenyl)-1*H*-pyrrole (222 mg, 1 mmol), 5-(*sec*-butyl)-1-aza-5-stannabicyclo[3.3.3]undecane (348 mg, 1.1 mmol), and JackiePhos (48 mg, 0.06 mmol). A brown liquid (131 mg, 77%) was isolated by column chromatography (99:1 Hex/EtOAc). <sup>1</sup>H NMR (500 MHz, CDCl<sub>3</sub>): δ 7.32 (d, *J* = 8.5 Hz, 2H), 7.24 (d, *J* = 8.5 Hz, 2H), 7.08 (t, *J* = 2 Hz, 2H), 6.35 (t, *J* = 2 Hz, 2H), 2.64 (m, 1H), 1.62 (m, 2H), 1.27 (d, *J* = 7 Hz, 3H), 0.86 (t, *J* = 7.5 Hz, 3H) ppm. <sup>13</sup>C NMR (125 MHz, CDCl<sub>3</sub>): δ 145.4, 138.9, 128.2, 120.8, 119.6, 110.2, 41.3, 31.4, 22.1, 12.4 ppm.

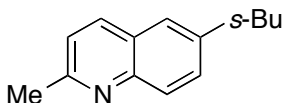

**6-(*sec*-Butyl)-2-methylquinoline (7o)** (Table 1, row 4, column 3). The general procedure was employed using 6-bromo-2-methylquinoline (222 mg, 1 mmol), 5-(*sec*-butyl)-1-aza-5-stannabicyclo[3.3.3]undecane (348 mg, 1.1 mmol), and JackiePhos (48 mg, 0.06 mmol). A yellow liquid (172 mg, 86%) was isolated by column chromatography (95:5 Hex/EtOAc). <sup>1</sup>H NMR (500 MHz, CDCl<sub>3</sub>): δ 7.99 (d, *J* = 8.0 Hz, 1H), 7.95 (d, *J* = 8.5 Hz, 1H), 7.51-7.56 (m, 2H), 7.24 (d, *J* = 8.5 Hz, 1H), 2.77 (m, 1H), 2.72 (s, 3H), 1.68 (m, 2H), 1.32 (d, *J* = 7.0 Hz, 3H), 0.84 (t, *J* = 7.5 Hz, 3H) ppm. <sup>13</sup>C NMR (125 MHz, CDCl<sub>3</sub>): δ 158.2, 147.1, 145.2, 136.0, 129.6, 128.7, 126.7, 124.9, 122.0, 41.8, 31.3, 25.5, 22.0, 12.4 ppm. HRMS (EI<sup>+</sup>): Calcd (M<sup>+</sup>) 199.1361; Found 199.1359.

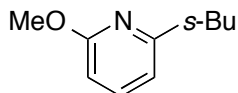

**2-(*sec*-Butyl)-6-methoxyquinoline (7p)** (Table 1, row 5, column 3). The general procedure was employed using 2-bromo-6-methoxyquinoline (188 mg, 1 mmol), 5-(*sec*-butyl)-1-aza-5-stannabicyclo[3.3.3]undecane (475 mg, 1.5 mmol), and JackiePhos (80 mg, 0.1 mmol). A colorless liquid (92.5 mg, 56%) was isolated by column chromatography (99:1 Hex/Ether). <sup>1</sup>H NMR (500 MHz, CDCl<sub>3</sub>): δ 7.46 (t, *J* = 7.5 Hz,

1H), 6.67 (d,  $J = 7.5$  Hz, 1H), 6.52 (d,  $J = 8$  Hz, 1H), 3.92 (s, 3H), 2.66 (m, 1H), 1.76 (m, 1H), 1.57 (m, 1H), 1.25 (d,  $J = 6.5$  Hz, 3H), 0.83 (t,  $J = 7.5$  Hz, 3H) ppm.  $^{13}\text{C}$  NMR (125 MHz,  $\text{CDCl}_3$ ):  $\delta$  164.6, 163.8, 138.7, 114.3, 107.3, 53.3, 43.4, 29.8, 20.4, 12.3 ppm. HRMS ( $\text{EI}^+$ ): Calcd ( $\text{M}^+$ ) 165.1154; Found 165.1154.

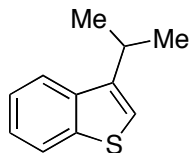

**3-Isopropylthionaphthene<sup>14</sup> (9b)** (Table 2, row 1, column 1). The general procedure was employed using 3-bromothionaphthene (107 mg, 0.5 mmol), 5-(*iso*-Propyl)-1-aza-5-stannabicyclo[3.3.3]undecane (166 mg, 0.55 mmol), and JackiePhos (24 mg, 0.03 mmol). A colorless liquid (125 mg, 71%) was isolated by column chromatography (99.5:0.5 Hex/EtOAc).  $^1\text{H}$  NMR (500 MHz,  $\text{CDCl}_3$ ):  $\delta$  7.86 (dd,  $J = 8, 0.5$  Hz, 1H), 7.80 (dd,  $J = 8, 0.5$  Hz, 1H), 7.36 (m, 2H), 7.10 (s, 1H), 3.32 (septet,  $J = 7$  Hz, 1H), 1.39 (d,  $J = 7$  Hz, 6H) ppm.  $^{13}\text{C}$  NMR (125 MHz,  $\text{CDCl}_3$ ):  $\delta$  143.9, 141.0, 138.8, 124.3, 123.9, 123.1, 122.1, 119.1, 28.1, 23.0 ppm.

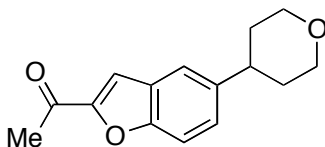

**2-Acetyl-5-(tetrahydro-2H-pyran-4-yl)benzofuran (9c)** (Table 2, row 2, column 1). The general procedure was employed using 2-Acetyl-5-bromobenzofuran (120 mg, 0.5 mmol), 5-(tetrahydro-2H-pyran-4-yl)-1-aza-5-stannabicyclo[3.3.3]undecane (189 mg, 0.55 mmol), and JackiePhos (24 mg, 0.03 mmol). A brown solid (103 mg, 85%) was isolated by column chromatography (70:30 Hex/Ether).  $^1\text{H}$  NMR (500 MHz,  $\text{CDCl}_3$ ):  $\delta$  7.51-7.53 (m, 2H), 7.47 (s, 1H), 7.36 (dd,  $J = 8.5, 1.5$  Hz, 1H), 4.12 (dd,  $J = 11.0, 3.5$  Hz, 2H), 3.55 (td,  $J = 11.5, 2.0$  Hz, 2H), 2.86 (m, 1H), 2.60 (s, 3H), 1.79-1.90 (m, 4H) ppm.  $^{13}\text{C}$  NMR (125 MHz,  $\text{CDCl}_3$ ):  $\delta$  188.5, 154.6, 153.0, 141.9, 127.8, 127.3, 120.6, 113.1, 112.4, 68.4, 41.5, 34.4, 26.5 ppm. HRMS ( $\text{FAB}^+$ ): Calcd ( $\text{M}+\text{H}^+$ ) 245.1178; Found 245.1187.

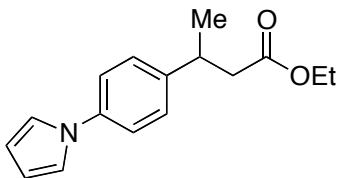

**Ethyl 3-(4-(1H-pyrrol-1-yl)phenyl)butanoate (9d)** (Table 2, row 3, column 1). The general procedure was employed using 1-(4-bromophenyl)-1H-pyrrole (111 mg, 0.5

mmol), and ethyl 3-(1-aza-5-stannabicyclo[3.3.3]undecan-5-yl)butanoate (206 mg, 0.55 mmol), and JackiePhos (24 mg, 0.03 mmol). A reddish brown oil (104 mg, 81%) was isolated by column chromatography (92:8 Hex/Ether).  $^1\text{H}$  NMR (500 MHz,  $\text{CDCl}_3$ ):  $\delta$  7.32 (d,  $J = 8.5$  Hz, 2H), 7.27 (d,  $J = 8.5$  Hz, 2H), 7.06 (t,  $J = 2.0$  Hz, 2H), 6.33 (t,  $J = 2.0$  Hz, 2H), 4.09 (quartet,  $J = 7.0$  Hz, 2H), 3.31 (m, 1H), 2.54-2.64 (m, 2H), 1.32 (d,  $J = 7.0$  Hz, 3H), 1.19 (t,  $J = 7.0$  Hz, 3H) ppm.  $^{13}\text{C}$  NMR (125 MHz,  $\text{CDCl}_3$ ):  $\delta$  172.4, 143.4, 139.4, 128.1, 120.9, 119.5, 110.4, 60.5, 43.2, 36.2, 22.1, 14.4 ppm. HRMS (FAB $^+$ ): Calcd ( $\text{M}^+$ ) 257.1416; Found 257.1424.

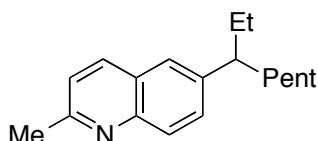

**2-Methyl-6-(octan-3-yl)quinoline (9e)** (Table 2, row 4, column 1). The general procedure was employed using 6-bromo-2-methylquinoline (111 mg, 0.5 mmol), 5-(octan-3-yl)-1-aza-5-stannabicyclo[3.3.3]undecane (279 mg, 0.75 mmol), and JackiePhos (40 mg, 0.05 mmol). An oily, yellow solid (128 mg, 100%) was isolated by column chromatography (80:20 Hex/Ether).  $^1\text{H}$  NMR (500 MHz,  $\text{CDCl}_3$ ):  $\delta$  7.96 (t,  $J = 9.0$  Hz, 2H), 7.50 (dd,  $J = 8.5$ , 2 Hz, 1H), 7.47 (d,  $J = 2.0$  Hz, 1H), 7.23 (d,  $J = 8.0$  Hz, 1H), 2.72 (s, 3H), 2.56 (m, 1H), 1.57-1.83 (m, 4H), 1.15-1.27 (m, 6H), 0.80 (t,  $J = 6.5$  Hz, 3H), 0.76 (t,  $J = 7.5$  Hz, 3H) ppm.  $^{13}\text{C}$  NMR (125 MHz,  $\text{CDCl}_3$ ):  $\delta$  158.2, 147.1, 143.7, 136.0, 129.7, 128.6, 126.6, 126.0, 122.0, 48.0, 36.7, 32.2, 29.8, 27.5, 25.5, 22.7, 14.3, 12.4 ppm. HRMS (FAB $^+$ ): Calcd ( $\text{M}+\text{H}$ ) $^+$  256.2065; Found 256.2063.

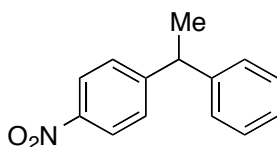

**1-Nitro-4-(1-phenylethyl)benzene<sup>15</sup> (9f)** (Table 2, row 1, column 2). The general procedure was employed 1-bromo-4-nitrobenzene (101 mg, 0.5 mmol), 5-(1-phenylethyl)-1-aza-5-stannabicyclo[3.3.3]undecane (273 mg, 0.75 mmol), and JackiePhos (40 mg, 0.05 mmol). A brownish liquid (104.5 mg, 92%) was isolated by column chromatography (99:1 Hex/Ether).  $^1\text{H}$  NMR (500 MHz,  $\text{CDCl}_3$ ):  $\delta$  8.18 (dd,  $J = 8.5$ , 2.0 Hz, 2H), 7.41-7.22 (m, 7H), 4.29 (quartet,  $J = 7.5$  Hz, 1H), 1.72 (d,  $J = 7.5$  Hz, 3H) ppm.  $^{13}\text{C}$  NMR (125 MHz,  $\text{CDCl}_3$ ):  $\delta$  154.2, 146.6, 144.7, 128.9, 128.6, 127.7, 126.9, 123.9, 44.9, 21.7 ppm. HRMS (EI $^+$ ): Calcd ( $\text{M}^+$ ) 227.0946; Found 227.0947.

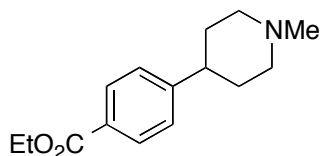

**Ethyl 4-(1-methylpiperidin-4-yl)benzoate (9g)** (Table 2, row 2, column 2). The general procedure was employed using ethyl 4-bromobenzoate (115 mg, 0.5 mmol), 5-(1-methylpiperidin-4-yl)-1-aza-5-stannabicyclo[3.3.3]undecane (268 mg, 0.75 mmol), and JackiePhos (40 mg, 0.05 mmol). A brown solid (94 mg, 76%) was isolated by column chromatography (91:9 CH<sub>2</sub>Cl<sub>2</sub>/MeOH). <sup>1</sup>H NMR (500 MHz, CDCl<sub>3</sub>): δ 7.95 (d, *J* = 8 Hz, 2H), 7.28 (d, *J* = 8.0 Hz, 2H), 4.33 (quartet, *J* = 7.0 Hz, 2H), 3.27 (d, *J* = 6.0 Hz, 2H), 2.65 (m, 1H), 2.56 (s, 3H), 2.48 (t, *J* = 11.0 Hz, 2H), 2.15 (m, 2H), 1.91 (d, *J* = 13.0 Hz, 2H), 1.35 (t, *J* = 7.0 Hz, 3H) ppm. <sup>13</sup>C NMR (125 MHz, CDCl<sub>3</sub>): δ 166.5, 149.7, 130.1, 129.2, 127.0, 61.0, 55.6, 45.1, 41.1, 31.6, 14.5 ppm. HRMS (FAB<sup>+</sup>): Calcd (M+H)<sup>+</sup> 248.1651; Found 248.1655.

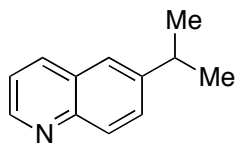

**6-Isopropylquinoline (9h)** (Table 2, row 3, column 2). The general procedure was employed using quinolin-6-yl trifluoromethanesulfonate (139 mg, 0.5 mmol), 5-(*iso*-propyl)-1-aza-5-stannabicyclo[3.3.3]undecane (166 mg, 0.55 mmol), and JackiePhos (24 mg, 0.03 mmol). A yellow liquid (74.2 mg, 88%) was isolated by column chromatography (90:10 Hex/Ether). <sup>1</sup>H NMR (500 MHz, CDCl<sub>3</sub>): δ 8.84 (dd, *J* = 4.0, 2.0 Hz, 1H), 8.10 (d, *J* = 8.5 Hz, 1H), 8.04 (d, *J* = 8.5 Hz, 1H), 7.62 (dd, *J* = 8.5, 2.0 Hz, 1H), 7.60 (s, 1H), 7.35 (dd, *J* = 8.5, 4.0 Hz, 1H), 3.10 (septet, *J* = 7.0 Hz, 1H), 1.34 (d, *J* = 7.0 Hz, 6H) ppm. <sup>13</sup>C NMR (125 MHz, CDCl<sub>3</sub>): δ 149.8, 147.4, 147.3, 135.9, 129.6, 129.5, 128.5, 124.0, 121.2, 34.3, 24.0 ppm.

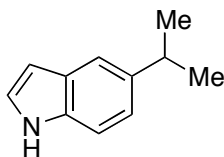

**5-Isopropyl-1H-indole<sup>8</sup> (9i)** (Table 2, row 4, column 2). The general procedure was employed using 3-iodo-1H-indole (122 mg, 0.5 mmol), 5-(*iso*-propyl)-1-aza-5-stannabicyclo[3.3.3]undecane (166 mg, 0.55 mmol), and JackiePhos (24 mg, 0.03 mmol). A reddish brown solid (48 mg, 60%) was isolated by column chromatography (92:8 Hex/Ether). <sup>1</sup>H NMR (500 MHz, CDCl<sub>3</sub>): δ 8.00 (br s, 1H), 7.53 (s, 1H), 7.33 (d, *J* = 8.5 Hz, 1H), 7.18 (t, *J* = 3.0 Hz, 1H), 7.10 (dd, *J* = 7.0, 1.5 Hz, 1H), 6.54 (s, 1H), 3.05 (m, 1H), 1.35 (m, 6H) ppm. <sup>13</sup>C NMR (125 MHz, CDCl<sub>3</sub>): δ 140.7, 134.5, 128.2, 124.5, 121.5, 117.8, 111.0, 102.6, 34.4, 24.9 ppm.

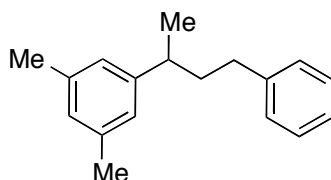

**1,3-Dimethyl-5-(4-phenylbutan-2-yl)benzene<sup>8</sup> (9j)** (Table 2, row 1, column 3). The general procedure was employed using 1-bromo-3,5-dimethylbenzene (93 mg, 0.5 mmol), 5-(4-phenylbutan-2-yl)-1-aza-5-stannabicyclo[3.3.3]undecane (294 mg, 0.75 mmol), and JackiePhos (40 mg, 0.05 mmol). A colorless liquid (104 mg, 87%) was isolated by column chromatography (99.7:0.3 Hex/Ether). <sup>1</sup>H NMR (500 MHz, CDCl<sub>3</sub>): δ 7.30 (t, *J* = 7 Hz, 2H), 7.18-7.22 (m, 3H), 6.88 (s, 1H), 6.86 (s, 2H), 2.69 (m, 1H), 2.60 (m, 2H), 2.35 (s, 6H), 1.95 (m, 2H), 1.30 (d, *J* = 7 Hz, 3H) ppm. <sup>13</sup>C NMR (125 MHz, CDCl<sub>3</sub>): δ 147.6, 142.9, 138.0, 128.6, 128.4, 127.8, 125.8, 125.1, 40.2, 39.6, 34.3, 22.7, 21.6 ppm.

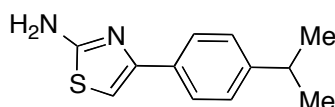

**2-Amino-4-(4-isopropylphenyl)thiazole<sup>16</sup> (9k)** (Table 2, row 2, column 3). The general procedure was employed using 2-amino-4-(4-bromophenyl)thiazole (128 mg, 0.5 mmol), 5-(*iso*-propyl)-1-aza-5-stannabicyclo[3.3.3]undecane (302 mg, 1 mmol), and JackiePhos (40 mg, 0.05 mmol). A brown oil (30.5 mg, 28%) was isolated by column chromatography (75:25 Hex/EtOAc). <sup>1</sup>H NMR (500 MHz, CDCl<sub>3</sub>): δ 7.68 (d, *J* = 8.0 Hz, 2H), 7.23 (d, *J* = 8.0 Hz, 2H), 6.67 (s, 1H), 5.06 (br s, 2H), 2.92 (septet, *J* = 7.0 Hz, 1H), 1.26 (d, *J* = 7.0 Hz, 6H) ppm. <sup>13</sup>C NMR (125 MHz, CDCl<sub>3</sub>): δ 167.5, 151.6, 148.8, 132.5, 126.9, 126.2, 102.3, 34.1, 24.1 ppm.

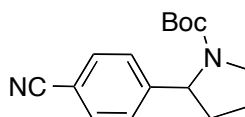

***tert*-Butyl 2-(4-cyanophenyl)pyrrolidine-1-carboxylate<sup>6</sup> (9l)** (Table 2, row 3, column 3). The general procedure was employed using 4-bromobenzonitrile (91 mg, 0.5 mmol) *tert*-butyl 2-(1-aza-5-stannabicyclo[3.3.3]undecan-5-yl)pyrrolidine-1-carboxylate (429 mg, 1 mmol), and JackiePhos (40 mg, 0.05 mmol). A white solid (85 mg, 63%) was isolated by column chromatography (70:30 Hex/Ether). <sup>1</sup>H NMR (500 MHz, CDCl<sub>3</sub>) (two rotamers in a ratio of 3:2 were observed – major rotamer given): δ 7.60 (d, *J* = 8 Hz, 2H), 7.28 (d, *J* = 8.5 Hz, 2H), 4.80 (m, 1H), 3.50-3.64 (m, 2H), 2.37 (m, 1H), 1.78-1.89 (m, 3H), 1.18 (s, 9H) ppm. <sup>13</sup>C NMR (125 MHz, CDCl<sub>3</sub>) (two rotamers were observed – minor rotamer in parentheses): δ 154.3 (154.3), 151.0 (149.0), 132.3 (132.4), 126.4 (126.4), 119.1 (119.1), 110.6 (110.6), 79.9 (83.0), 61.3 (60.3), 47.3 (48.3), 36.1 (34.1), 28.3 (28.3), 23.4 (23.7) ppm.

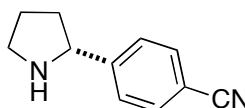



**(R)-4-(Pyrrolidin-2-yl)benzotrile.**<sup>17</sup> To a solution of *t*-butyl 2-(4-cyanophenyl)pyrrolidine-1-carboxylate (54.5 mg, 0.2 mmol) in CH<sub>2</sub>Cl<sub>2</sub> (1 mL) at 0 °C, trifluoroacetic acid (114 mg, 1.0 mmol) in CH<sub>2</sub>Cl<sub>2</sub> (1 mL) was added dropwise. After having stirred for 3h, the reaction was quenched with saturated aqueous NaHCO<sub>3</sub> solution. The resulting mixture was extracted CH<sub>2</sub>Cl<sub>2</sub> (3x). The combined CH<sub>2</sub>Cl<sub>2</sub> layers were washed with brine and dried over Na<sub>2</sub>SO<sub>4</sub>. A pale yellow oil was obtained (26.9 mg, 78%). <sup>1</sup>H NMR (500 MHz, CDCl<sub>3</sub>): δ 7.58 (d, *J* = 8.0 Hz, 2H), 7.47 (d, *J* = 8.0 Hz, 2H), 4.20 (t, *J* = 6.0 Hz, 1H), 3.17 (m, 1H), 3.06 (m, 1H), 2.87 (br, 1H), 2.22 (m, 1H), 1.89 (m, 2H), 1.62 (m, 1H). <sup>13</sup>C NMR (125 MHz, CDCl<sub>3</sub>): δ 150.9, 132.2, 127.6, 119.3, 110.6, 61.9, 53.8, 29.9, 25.7 ppm.

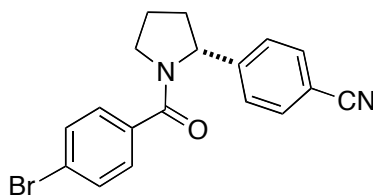

**(R)-4-(1-(4-Bromobenzoyl)pyrrolidin-2-yl)benzotrile (11).** 4-(Pyrrolidin-2-yl)benzotrile (8.5 mg, 0.05 mmol) and triethylamine (5 mg, 0.05 mmol) were dissolved into CH<sub>2</sub>Cl<sub>2</sub> (2.0 mL) and cooled to 0 °C. 4-Bromobenzoyl chloride (8.8 mg, 0.04 mmol) was added, and the reaction mixture was stirred for 3h. The mixture was concentrated and a white solid was isolated by column chromatography (60:40 Hex/Ether) quantitatively determined by calibrated GC analysis. <sup>1</sup>H NMR for the major rotamer (CDCl<sub>3</sub>): δ 7.63 (d, *J* = 8.0 Hz, 2H), 7.57 (d, *J* = 8.5 Hz, 2H), 7.47 (d, *J* = 8.0 Hz, 2H), 7.40 (d, *J* = 8.0 Hz, 2H), 5.27 (t, *J* = 7.5 Hz, 1H), 3.67-3.79 (m, 2H), 2.50 (m, 1H), 1.85-2.04 (m, 3H). <sup>13</sup>C NMR for the major rotamer: δ 169.3, 148.7, 135.2, 132.7, 131.8, 129.4, 126.6, 125.2, 119.1, 111.0, 61.5, 51.5, 34.9, 25.7 ppm.

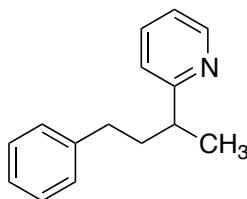

**2-(4-Phenylbutan-2-yl)pyridine (13b).** The general procedure was employed using 2-bromopyridine (79 mg, 0.5 mmol), 5-(4-phenylbutan-2-yl)-1-aza-5-stannabicyclo[3.3.3]undecane (294 mg, 0.75 mmol), and JackiePhos (40 mg, 0.05 mmol). A colorless liquid (68.3 mg, 64.6%) was isolated by column chromatography (10:90 Hex/Ether). <sup>1</sup>H NMR (500 MHz, CDCl<sub>3</sub>): δ 8.60 (m, 1H), 7.63 (m, 1H), 7.12-7.29 (m, 7H), 2.96 (q, *J* = 7 Hz, 1H), 2.58 (m, 2H), 2.15 (m, 1H), 1.95 (m, 1H), 1.36 (d, *J* = 7 Hz, 3H) ppm. <sup>13</sup>C NMR (125 MHz, CDCl<sub>3</sub>): δ 166.3, 149.5, 142.6, 136.5, 128.6, 128.4, 125.8, 121.9, 121.3, 41.8, 38.9, 34.1, 21.1 ppm. HRMS (FAB<sup>+</sup>): Calcd (M+H)<sup>+</sup> 212.1429; Found 212.1439. E.e. (91.2%) was determined using a ChiralCel OJ-3 column with 95:5 hexanes:isopropanol as eluent.

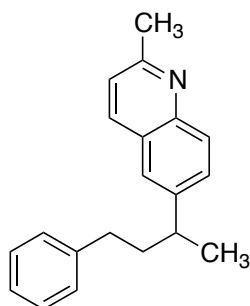

**2-Methyl-6-(4-phenylbutan-2-yl)quinolone (13c).** The general procedure was employed using 6-bromo-2-methylquinoline (111 mg, 0.5 mmol), 5-(4-phenylbutan-2-yl)-1-aza-5-stannabicyclo[3.3.3]undecane (294 mg, 0.75 mmol), and JackiePhos (40 mg, 0.05 mmol). A colorless liquid (89.2 mg, 64.8%) was isolated by column chromatography (10:90 Hex/Ether).  $^1\text{H}$  NMR (500 MHz,  $\text{CDCl}_3$ ):  $\delta$  8.02 (m, 2H), 7.59 (m, 2H), 7.14-7.30 (m, 6H), 2.93 (q,  $J = 7$  Hz, 1H), 2.77 (s, 3H), 2.56 (m, 2H), 2.05 (m, 2H), 1.39 (d,  $J = 7$  Hz, 3H) ppm.  $^{13}\text{C}$  NMR (125 MHz,  $\text{CDCl}_3$ ):  $\delta$  158.4, 147.1, 144.8, 142.5, 136.0, 129.5, 128.9, 128.5, 128.5, 126.7, 125.9, 125, 122.1, 40.1, 39.6, 34.1, 25.5, 22.6 ppm. HRMS ( $\text{FAB}^+$ ): Calcd ( $\text{M}+\text{H}^+$ ) 276.1754; Found 276.1752. E.e. (91.7%) was determined using a ChiralCel OJ-3 column with 95:5 hexanes:isopropanol as eluent.

## References

- 1) Dragoli, D. R.; Burdett, M. T.; Ellman, J. A. *J. Am. Chem. Soc.* **2001**, *123*, 10127.
- 2) Krasovskiy, A.; Knochel, P. *Synthesis* **2006**, *5*, 890.
- 3) APEX2 (version 2012.4). *Program for Bruker CCD X-ray Diffractometer Control*, Bruker AXS Inc., Madison, WI, 2012.
- 4) G. M. Sheldrick, SHELXTL, version 6.14. *Program for solution and refinement of crystal structures*, Universität Göttingen, Germany, 2009.
- 5) Vedejs, E.; Haight, A. R.; Moss, W. O. *J. Am. Chem. Soc.* **1992**, *114*, 6556.
- 6) Campos, K. R.; Klapars, A.; Waldman, J. H.; Dormer, P. G.; Chen, C.-Y. *J. Am. Chem. Soc.* **2006**, *128*, 3538.
- 7) Krasovskiy, A.; Duplais, C.; Lipshutz, B. H. *J. Am. Chem. Soc.* **2009**, *131*, 15592.
- 8) Joshi-Pangu, A.; Ganesh, M.; Biscoe, M. R. *Org. Lett.* **2011**, *13*, 1218.
- 9) Kondolff, I.; Doucet, H.; Santelli, M. *Organometallics* **2006**, *25*, 5219.
- 10) Nitta, Y.; Arakawa, Y.; Ueyama, N. *Chem. Pharm. Bull.* **1986**, *34*, 2710.
- 11) Laszlo, P.; Vandormael, J. *Chem. Lett.* **1988**, 1843.
- 12) Drain, D. J.; Daly, M. J.; Davy, B.; Horlington, M.; Howes, J. G. B.; Scruton, J. M., Selway, R. A. *J. Pharm. Pharmacol.* **1970**, *22*, 684.
- 13) Johnson, F.; Subramanian, R. *J. Org. Chem.* **1986**, *51*, 5040.
- 14) Matthews, J. M.; et al. *Bioorg. Med. Chem. Lett.* **2012**, *22*, 2922.
- 15) Shang, R.; Huang, Z.; Chu, L.; Fu, Y.; Liu, L. *Org. Lett.* **2011**, *13*, 4240.
- 16) Kaur, H.; Prakash, V.; Hindu, D. *Acta Cienc. Ind., Chem.* **2007**, *33*, 377.
- 17) McNally, A.; Prier, C. K.; MacMillan, D. W. C. *Science* **2011**, *334*, 1114.

Optically active stannatrane (**8**) prepared using Beak's enantioselective deprotonation method:

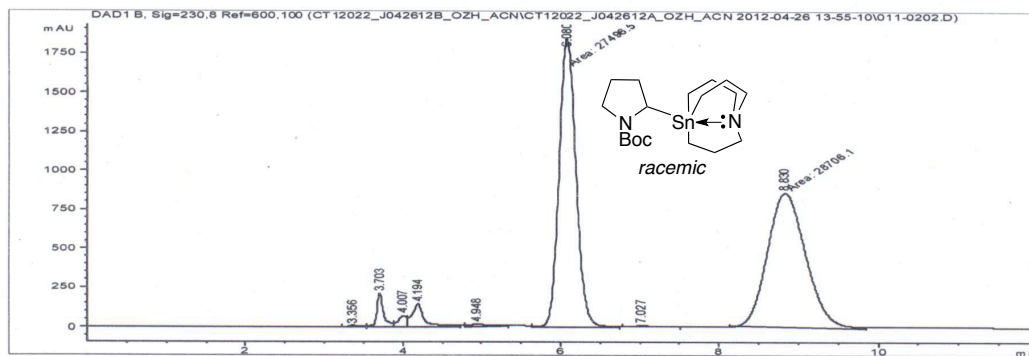

CT12022 (CCNY), racemate. OZH, acetonitrile, 1 ml./min., 25 deg. C. (5.0 mg./ml. solution, 20  $\mu$ L injection).

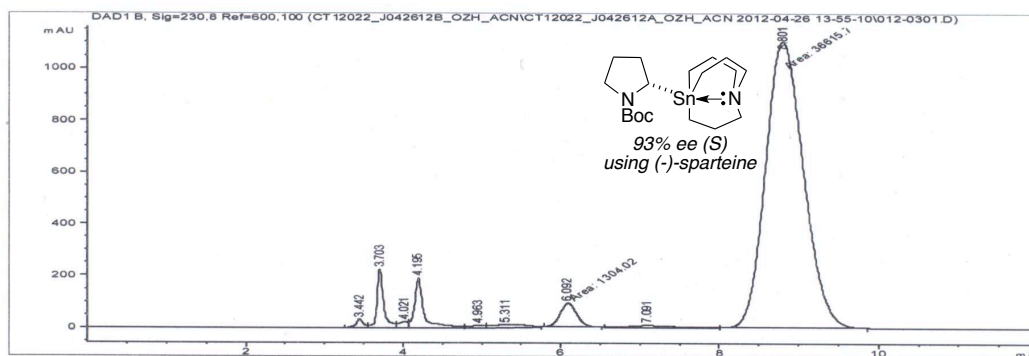

CT12022B (CCNY), optically active sample: E.e.: 93.2 %. (5.0 mg./ml. solution, 20  $\mu$ L injection).

Separation of enantiomers of **8** via preparatory chiral HPLC:

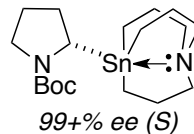

CHIRALCEL OZ-H, 5 $\mu$ , 4.6x250mm, 1mL/min  
100% ACN

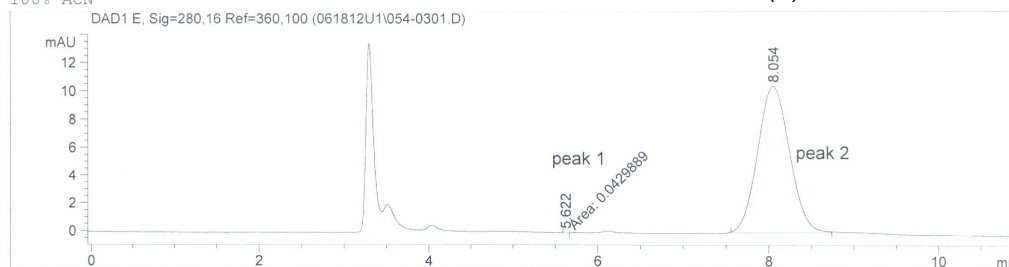

=====  
Area Percent Report  
=====

Sorted By : Signal  
Multiplier : 1.0000  
Dilution : 1.0000  
Use Multiplier & Dilution Factor with ISTDs

Signal 1: DAD1 B, Sig=210,16 Ref=360,100

| Peak # | RetTime [min] | Type | Width [min] | Area [mAU*s] | Height [mAU] | Area %  |
|--------|---------------|------|-------------|--------------|--------------|---------|
| 1      | 5.672         | MM   | 0.2510      | 12.97534     | 8.61742e-1   | 0.1437  |
| 2      | 8.054         | MF   | 0.4534      | 9017.08008   | 331.47092    | 99.8563 |

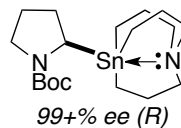

CHIRALCEL OZ-H, 5 $\mu$ , 4.6x250mm, 1mL/min  
100% ACN

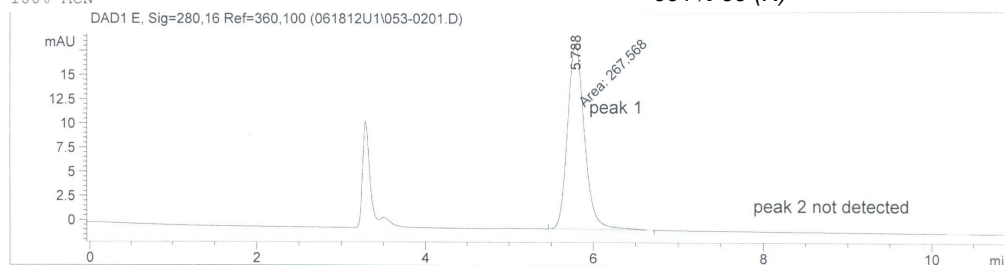

=====  
Area Percent Report  
=====

Sorted By : Signal  
Multiplier : 1.0000  
Dilution : 1.0000  
Use Multiplier & Dilution Factor with ISTDs

Signal 1: DAD1 B, Sig=210,16 Ref=360,100

| Peak # | RetTime [min] | Type | Width [min] | Area [mAU*s] | Height [mAU] | Area %   |
|--------|---------------|------|-------------|--------------|--------------|----------|
| 1      | 5.788         | BB   | 0.2138      | 8467.70898   | 610.60852    | 100.0000 |

Chiral GC of cross-coupling reaction using 99% ee pyrrolidine stannatrane (**8**) (after Boc deprotection)

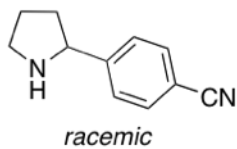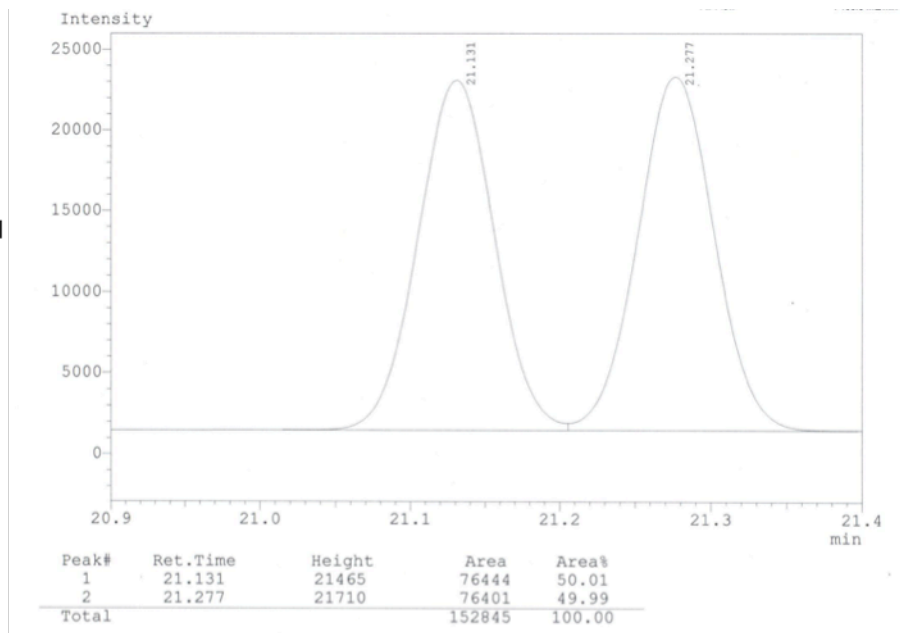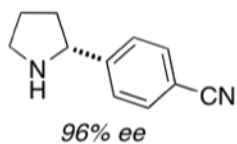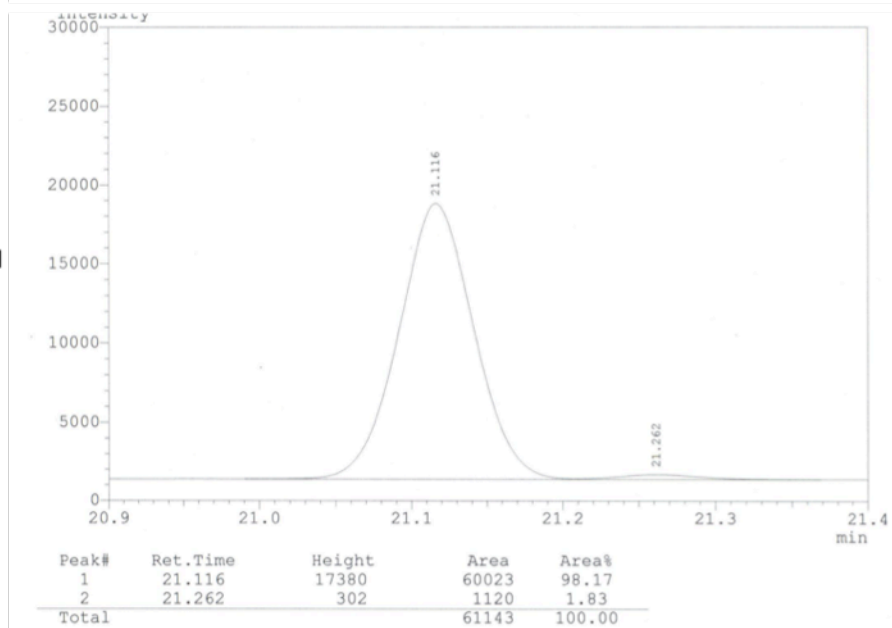

*Separation of enantiomers of 11 via preparatory chiral HPLC:*

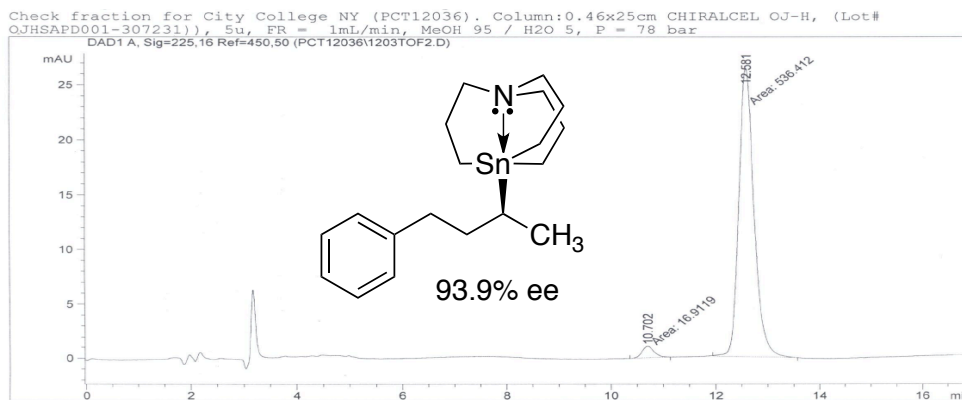

Area Percent Report

Sorted By : Signal  
Multiplier : 1.0000  
Dilution : 1.0000  
Use Multiplier & Dilution Factor with ISTDs

Signal 1: DAD1 A, Sig=225,16 Ref=450,50

| Peak # | RetTime [min] | Type | Width [min] | Area [mAU*s] | Height [mAU] | Area %  |
|--------|---------------|------|-------------|--------------|--------------|---------|
| 1      | 10.702        | MM   | 0.2647      | 16.91189     | 1.06481      | 3.0564  |
| 2      | 12.581        | MM   | 0.3386      | 536.41187    | 26.40066     | 96.9436 |

Check fraction for City College NY (PCT12036). Column:0.46x25cm CHIRALCEL OJ-H, (Lot# OJHSAPD001-307231), 5u, FR = 1mL/min, MeOH 95 / H2O 5, P = 78 bar  
DAD1 A, Sig=225,16 Ref=450,50 (PCT12036\1203TOF1.D)

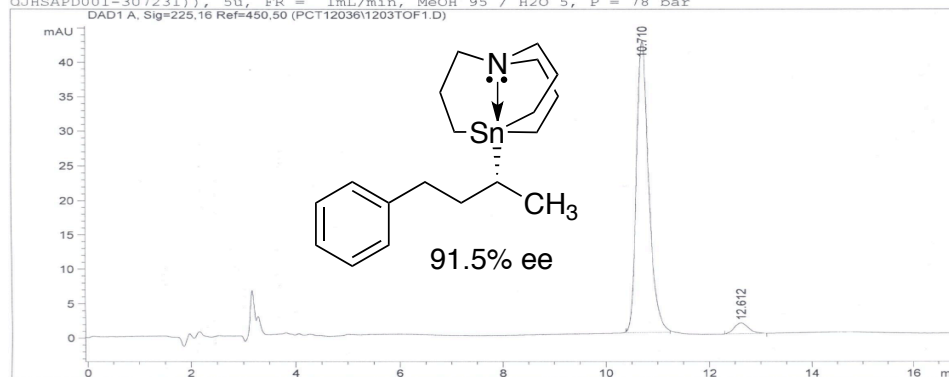

Area Percent Report

Sorted By : Signal  
Multiplier : 1.0000  
Dilution : 1.0000  
Use Multiplier & Dilution Factor with ISTDs

Signal 1: DAD1 A, Sig=225,16 Ref=450,50

| Peak # | RetTime [min] | Type | Width [min] | Area [mAU*s] | Height [mAU] | Area %  |
|--------|---------------|------|-------------|--------------|--------------|---------|
| 1      | 10.710        | BB   | 0.2537      | 702.60809    | 42.31002     | 95.7986 |
| 2      | 12.612        | BB   | 0.2966      | 30.81401     | 1.61521      | 4.2014  |

**Note: Absolute configuration not determined for enantiomers of 11**

HPLC of product **13b** from reaction of 2-(4-Phenylbutan-2-yl)pyridine and optically-active **12** (93.9% ee)

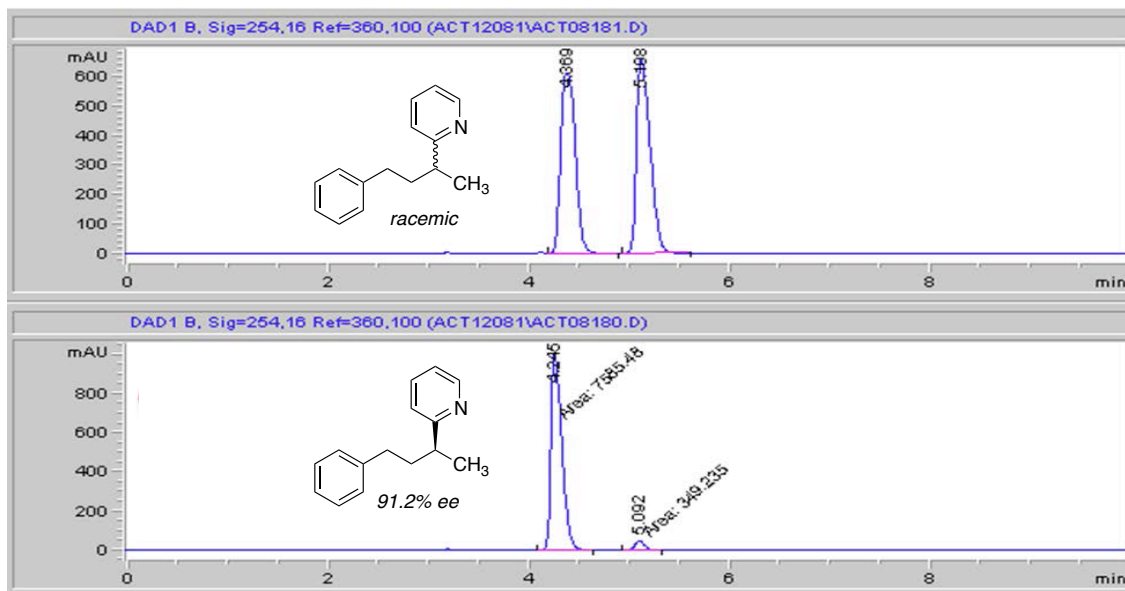

| Chromatographic Conditions for the Separation of the Enantiomers of MRB-2-Pyridine on CHIRACEL OJ-3 |                                                              |
|-----------------------------------------------------------------------------------------------------|--------------------------------------------------------------|
| Column                                                                                              | CHIRALCEL OJ-3 (150 x 4.6 mm i.d., 3 micron)<br>Part # 17524 |
| Mobile Phase                                                                                        | Hexane/ Isopropanol 95:5                                     |
| Flow Rate                                                                                           | 1.0 mL/min                                                   |
| Detection                                                                                           | UV, 254 nm; ref 360 nm                                       |
| Temperature                                                                                         | 25°C                                                         |
| Sample                                                                                              | ca. 2.0 mg /mL in mobile phase                               |
| Inject. Volume                                                                                      | 5.0 microl                                                   |

HPLC of product **13c** from reaction of 2-Methyl-6-(4-phenylbutan-2-yl)quinolone and optically-active **12** (93.9% ee)

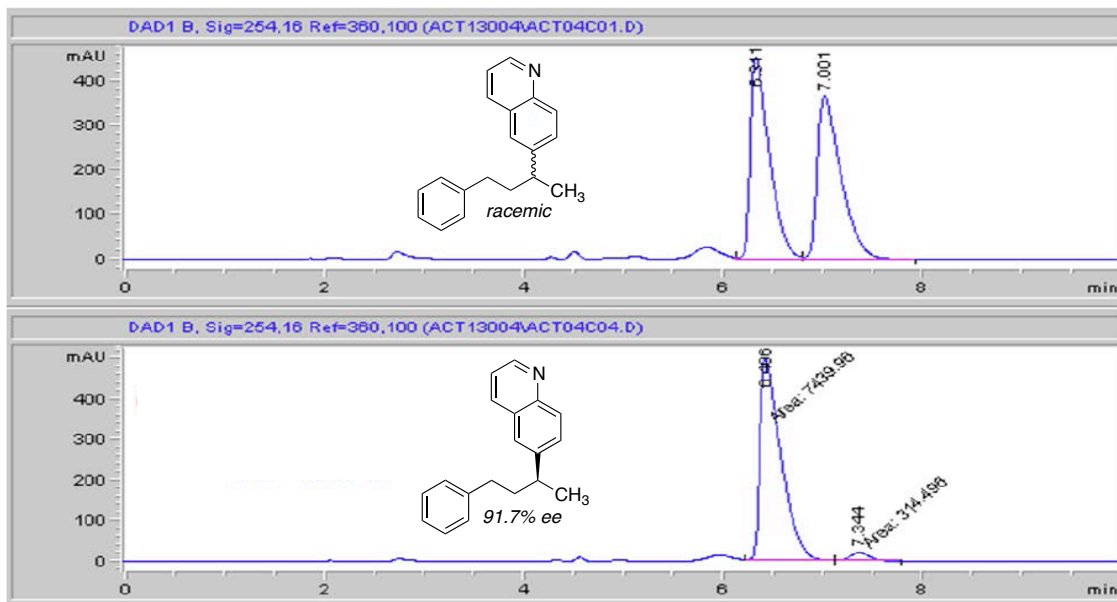

| Chromatographic Conditions for the Separation of the Enantiomers of MRB-Quinoline on CHIRACEL OJ-3 |                                                              |
|----------------------------------------------------------------------------------------------------|--------------------------------------------------------------|
| Column                                                                                             | CHIRALCEL OJ-3 (150 x 4.6 mm i.d., 3 micron)<br>Part # 17524 |
| Mobile Phase                                                                                       | Hexane/ Isopropanol 95:5                                     |
| Flow Rate                                                                                          | 1.0 mL/min                                                   |
| Detection                                                                                          | UV, 254 nm; ref 360 nm                                       |
| Temperature                                                                                        | 25°C                                                         |
| Sample                                                                                             | ca. 2.0 mg /mL in mobile phase                               |
| Inject. Volume                                                                                     | 5.0 microL                                                   |



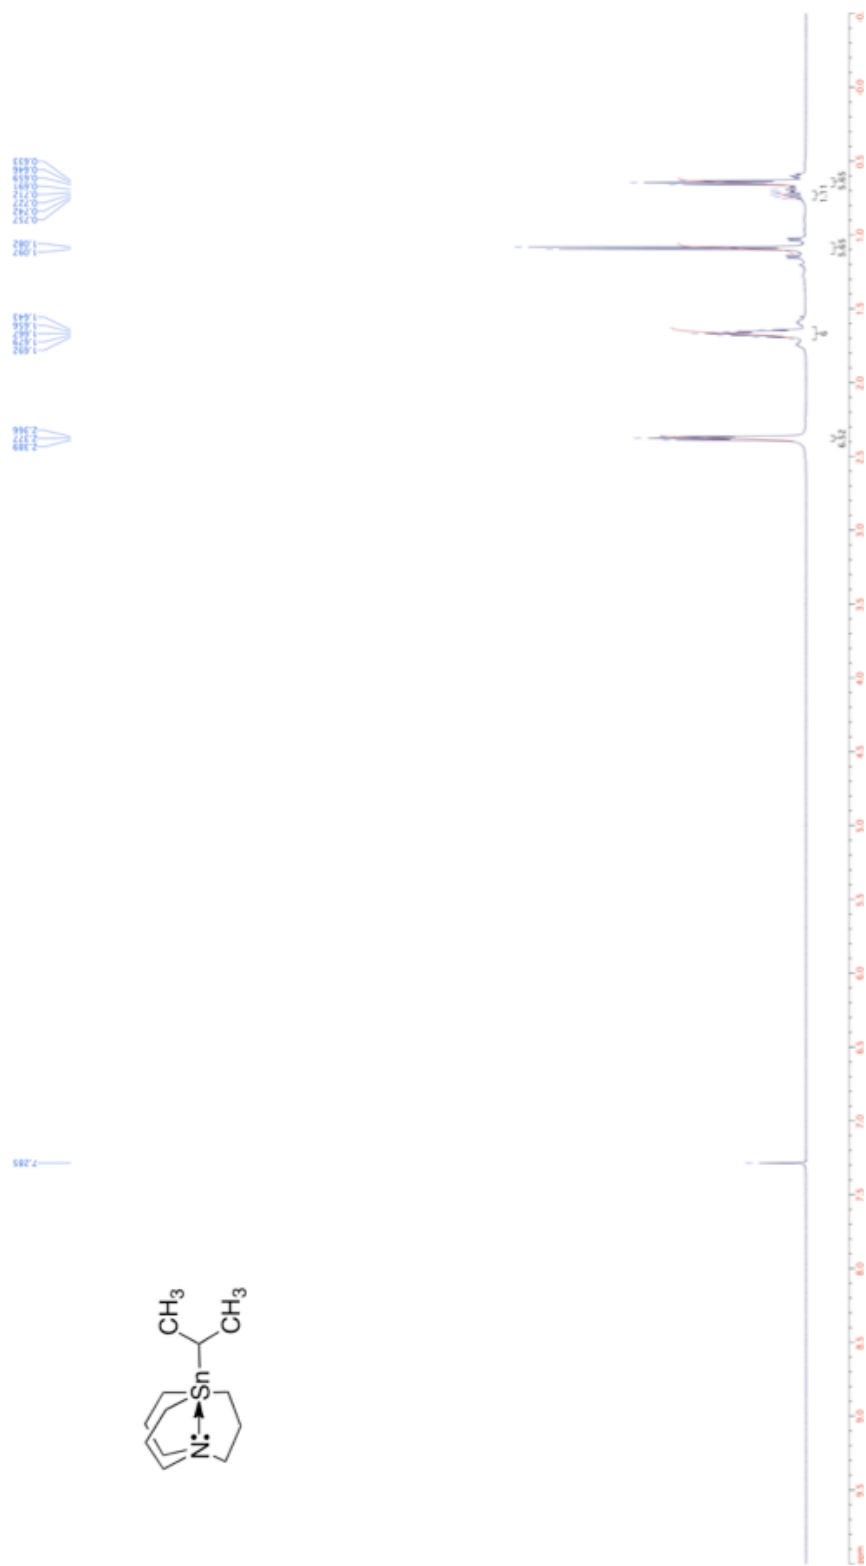

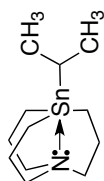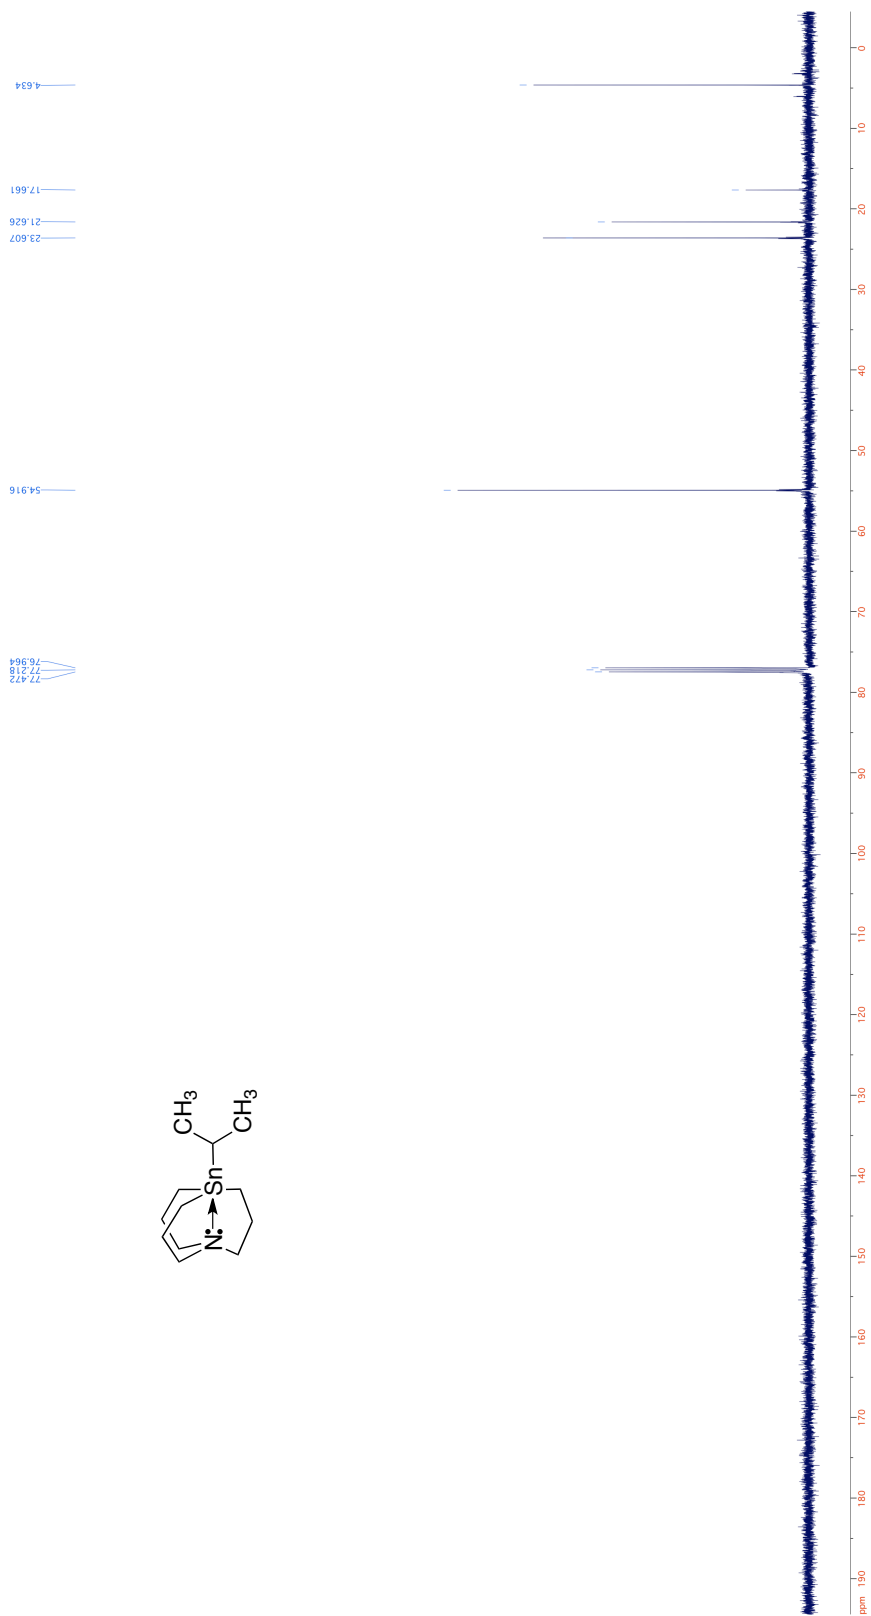

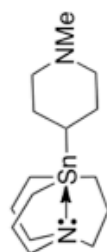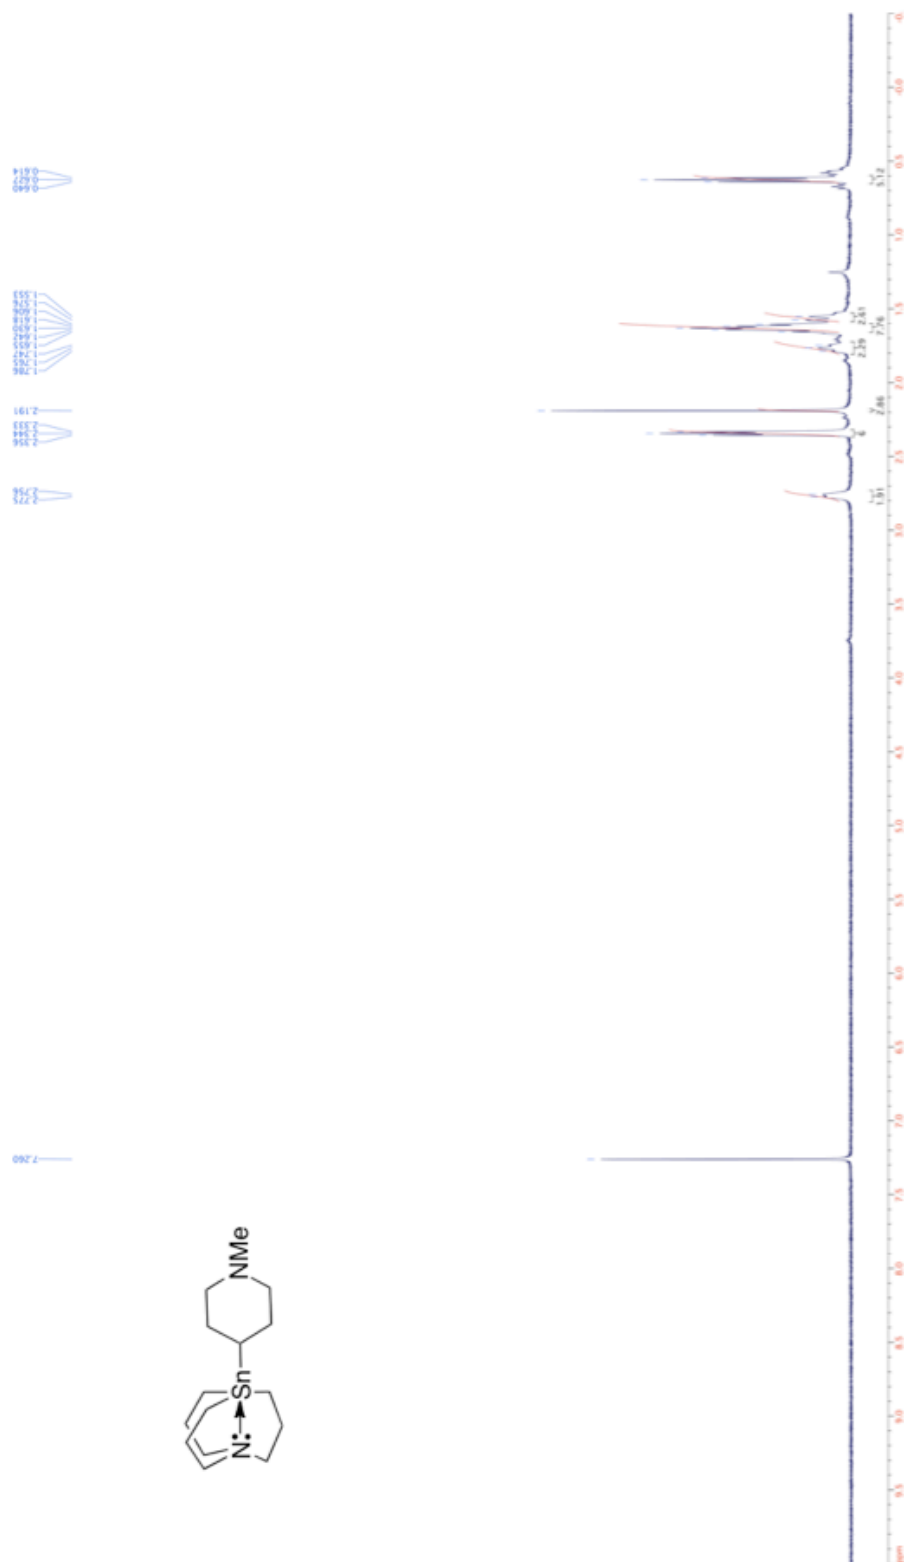

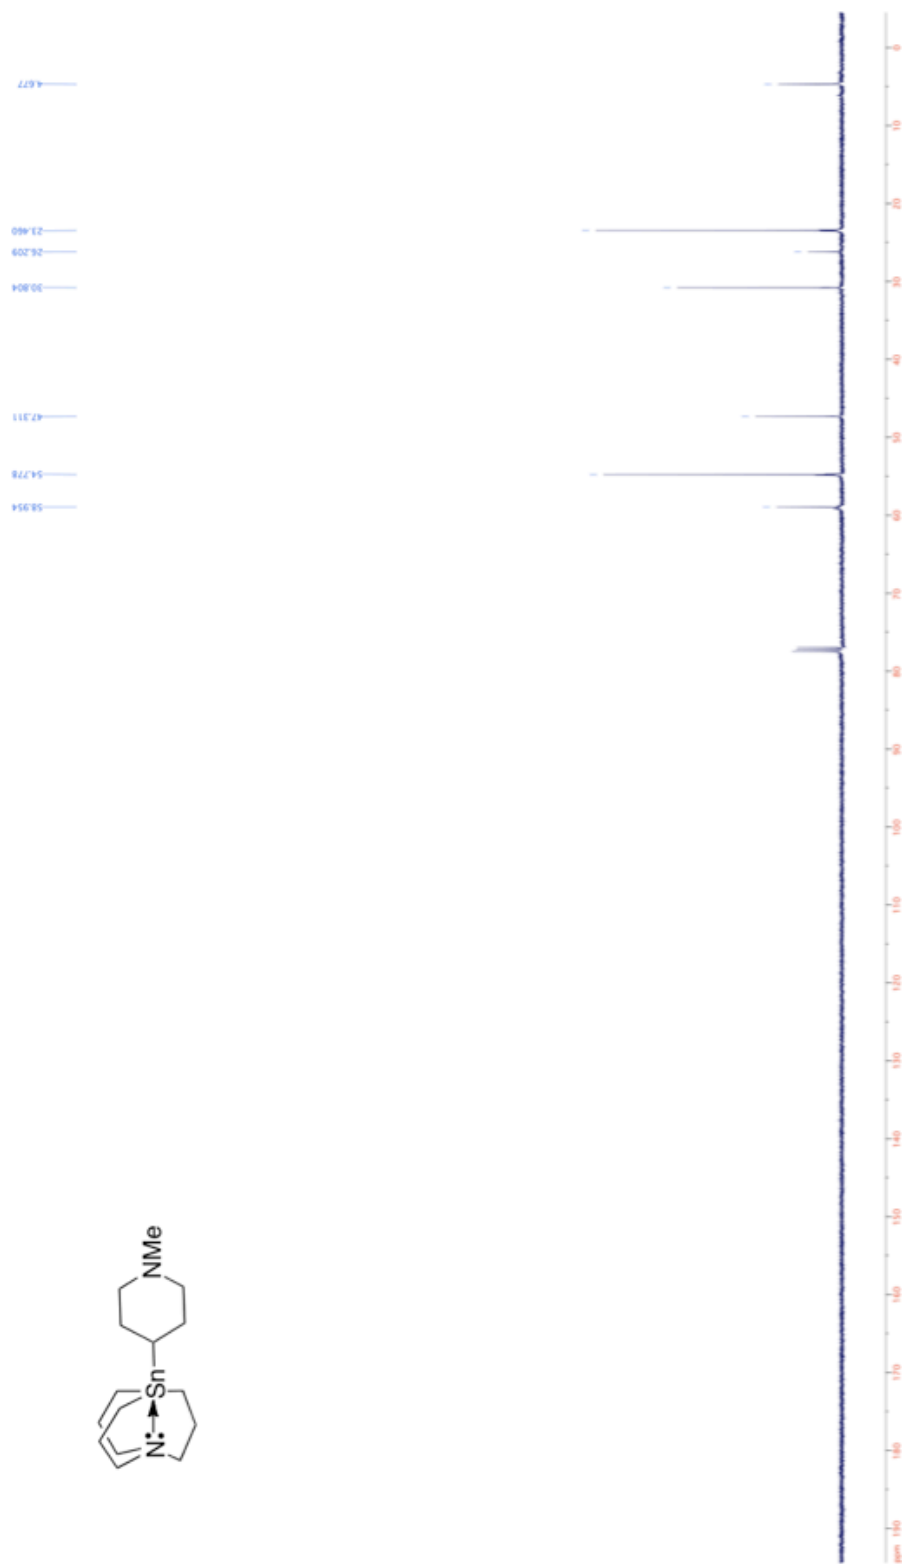

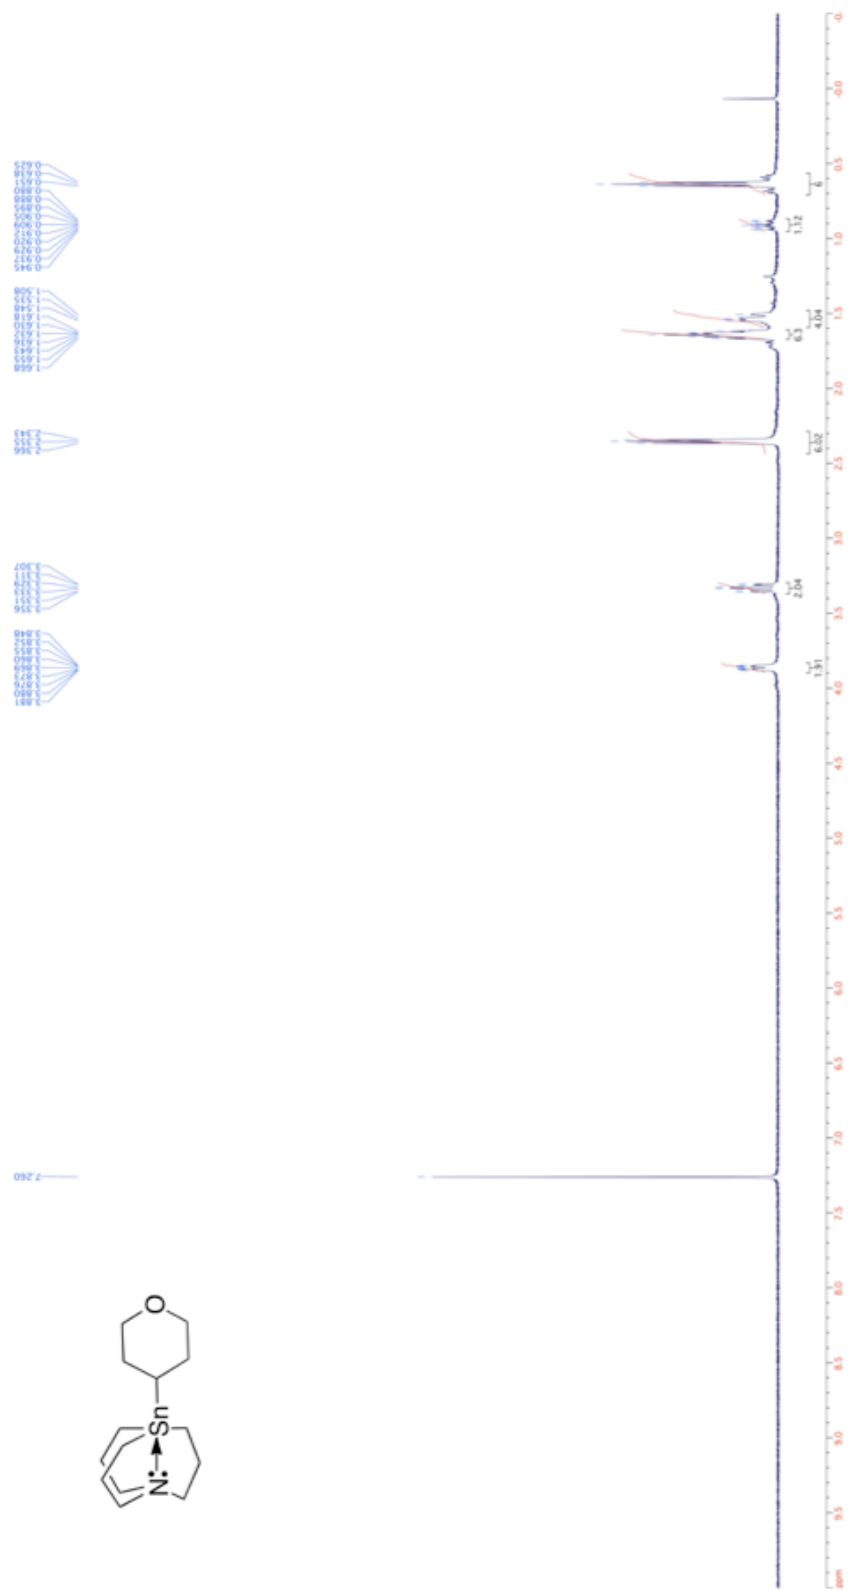

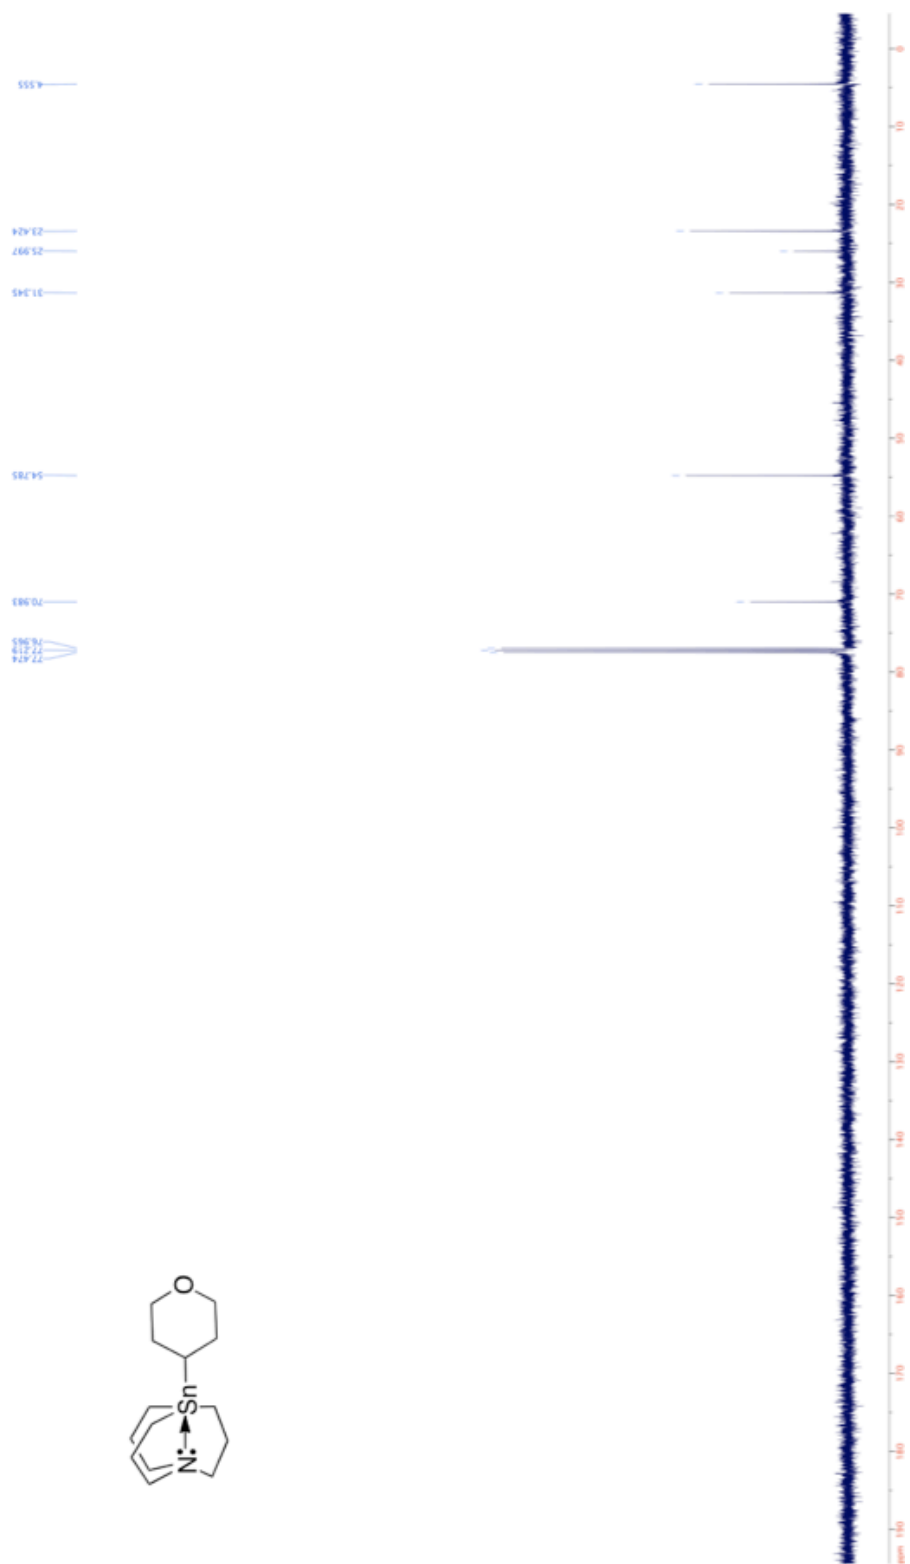

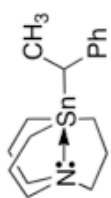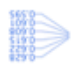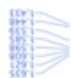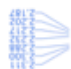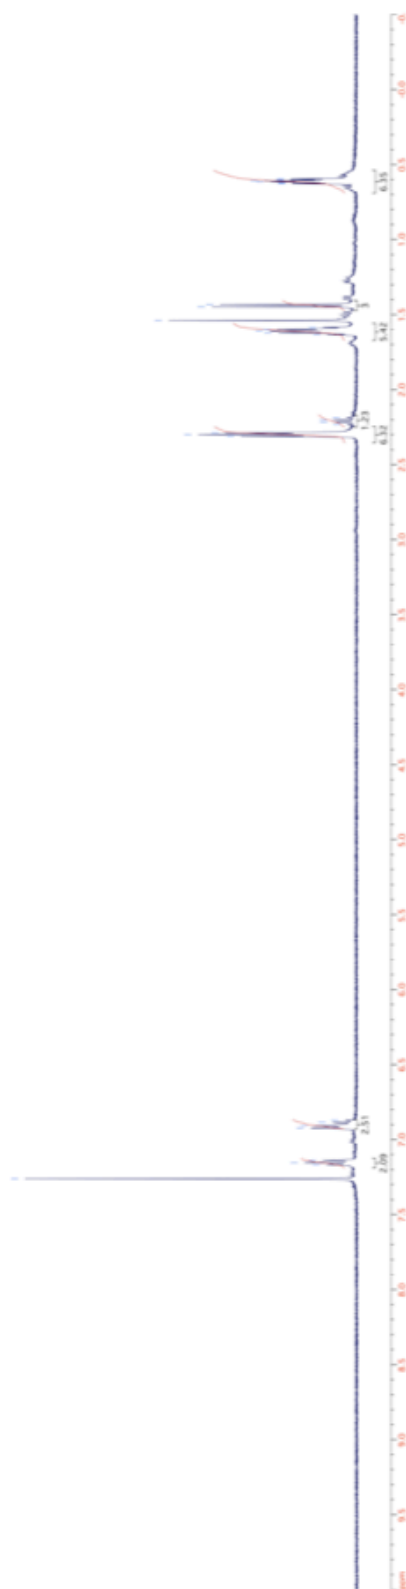

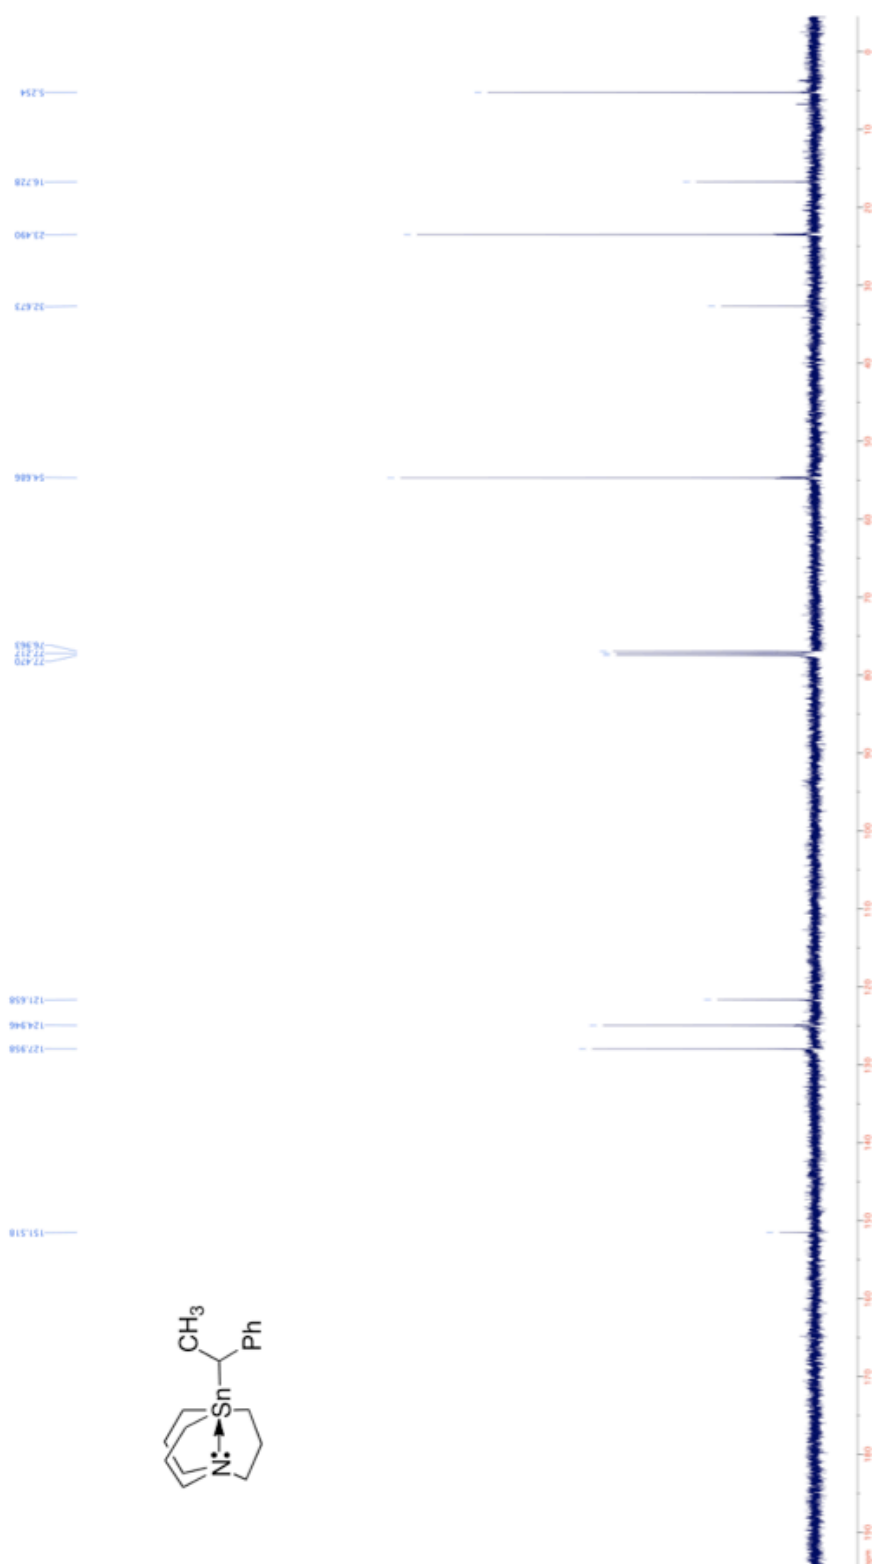





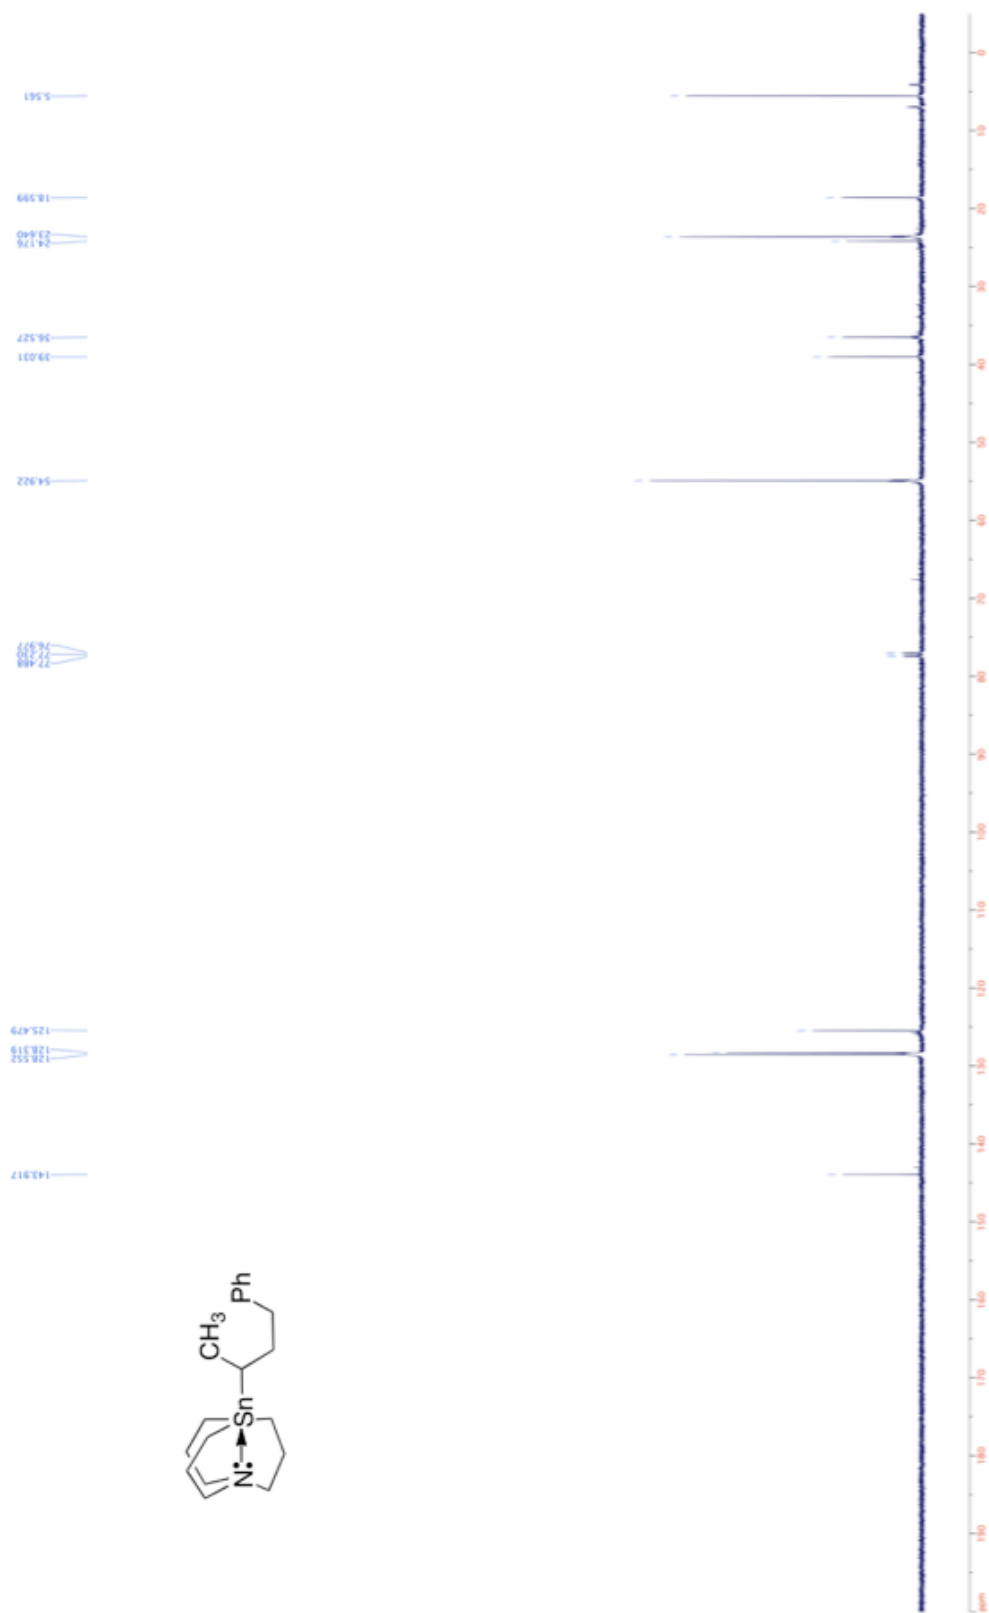



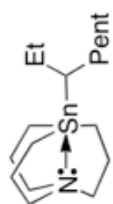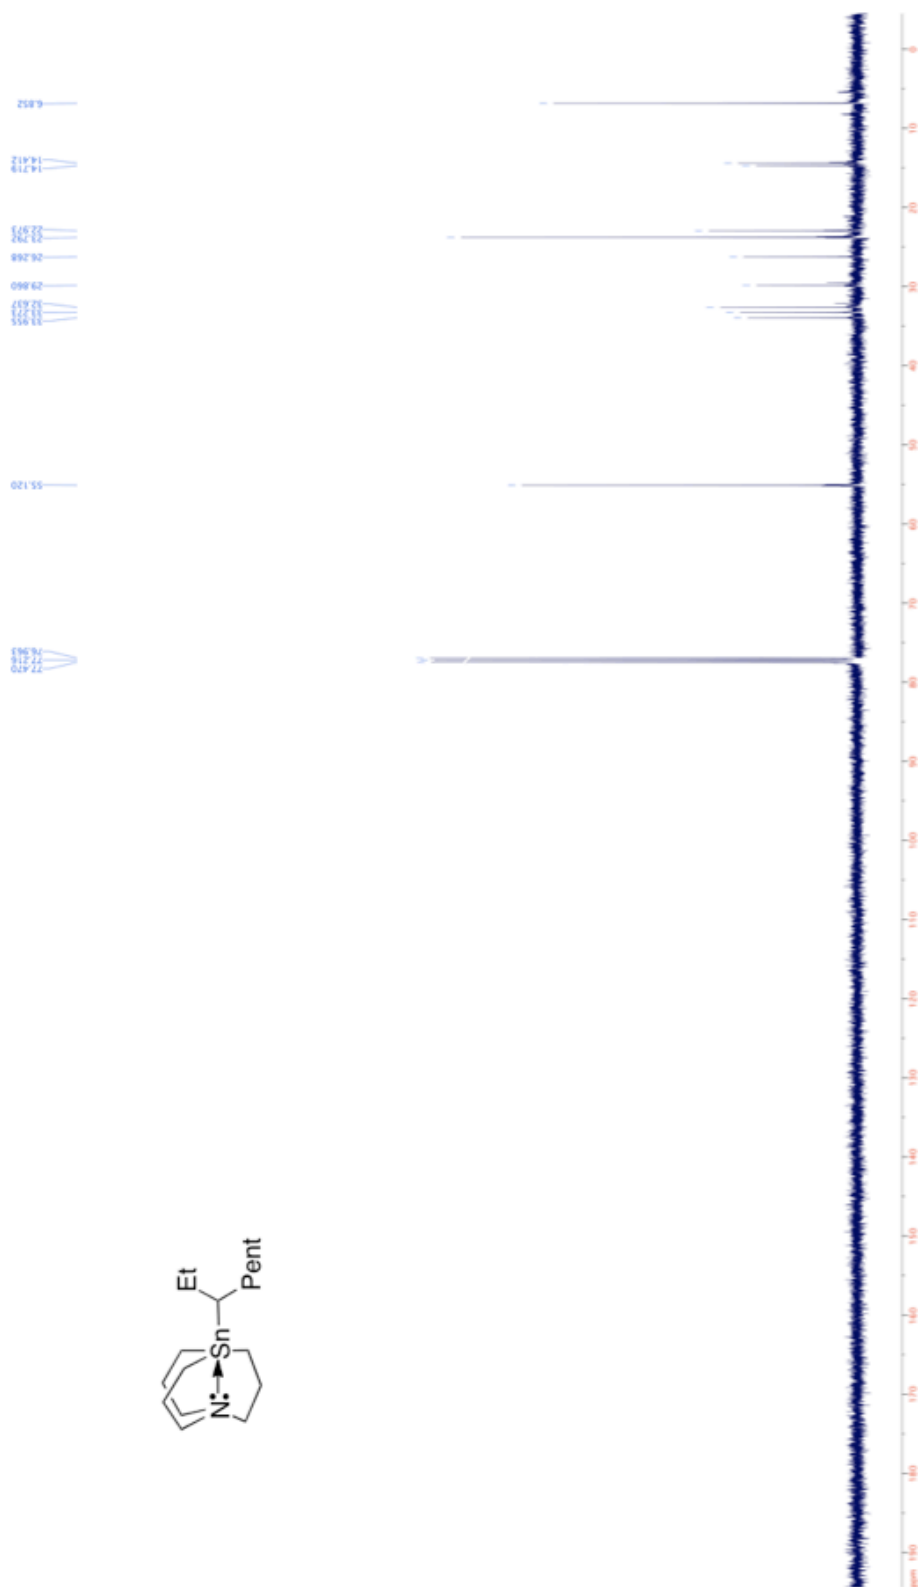

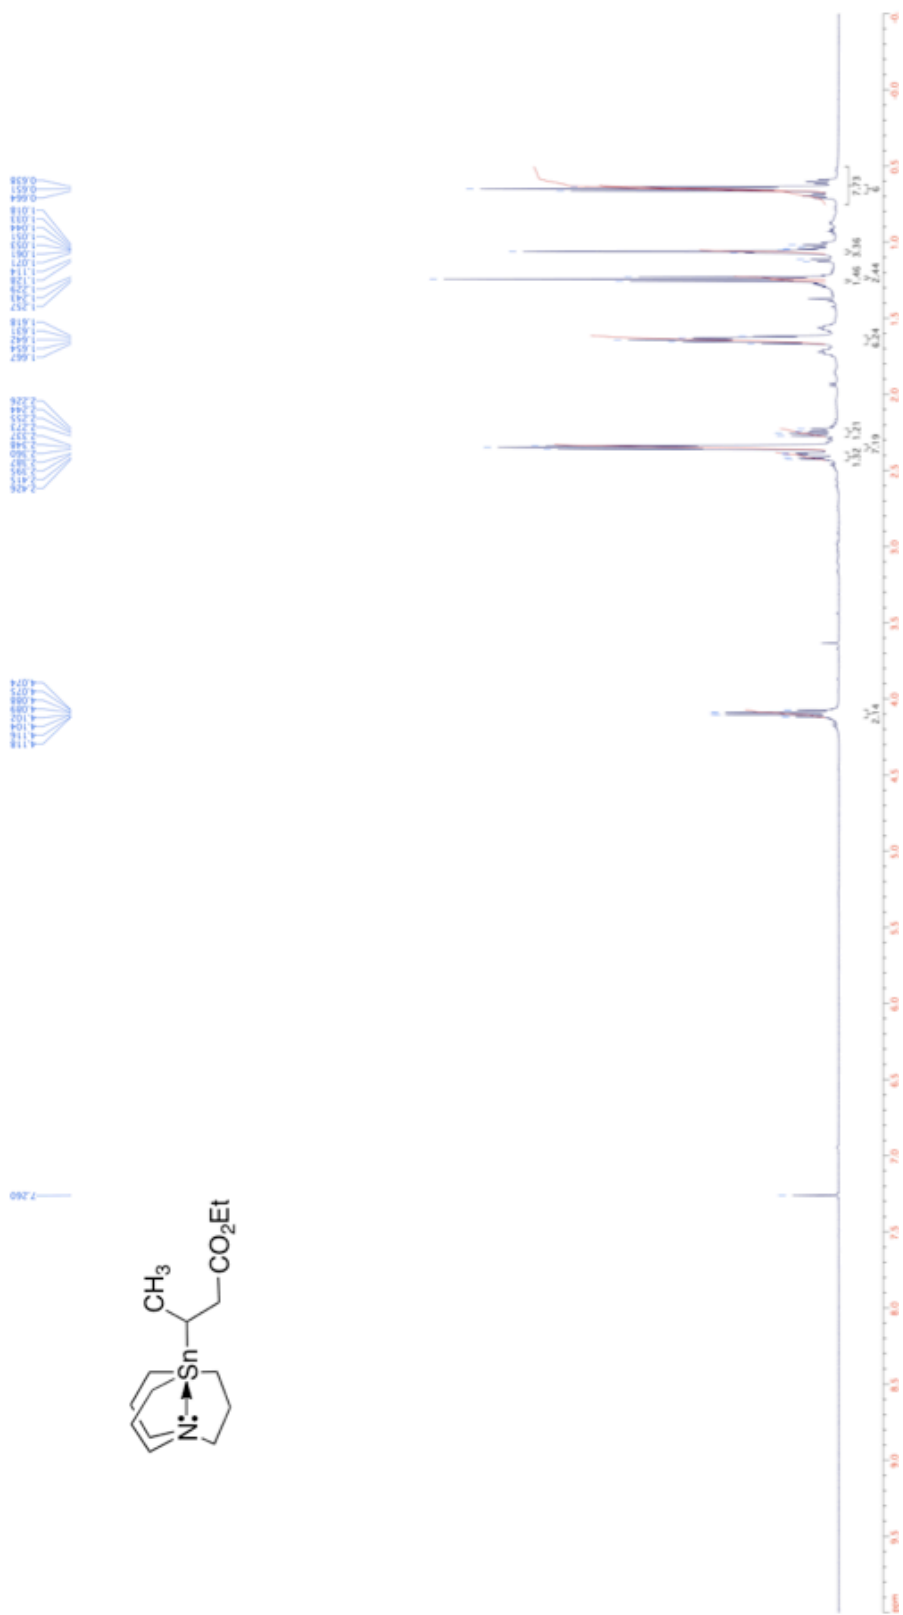

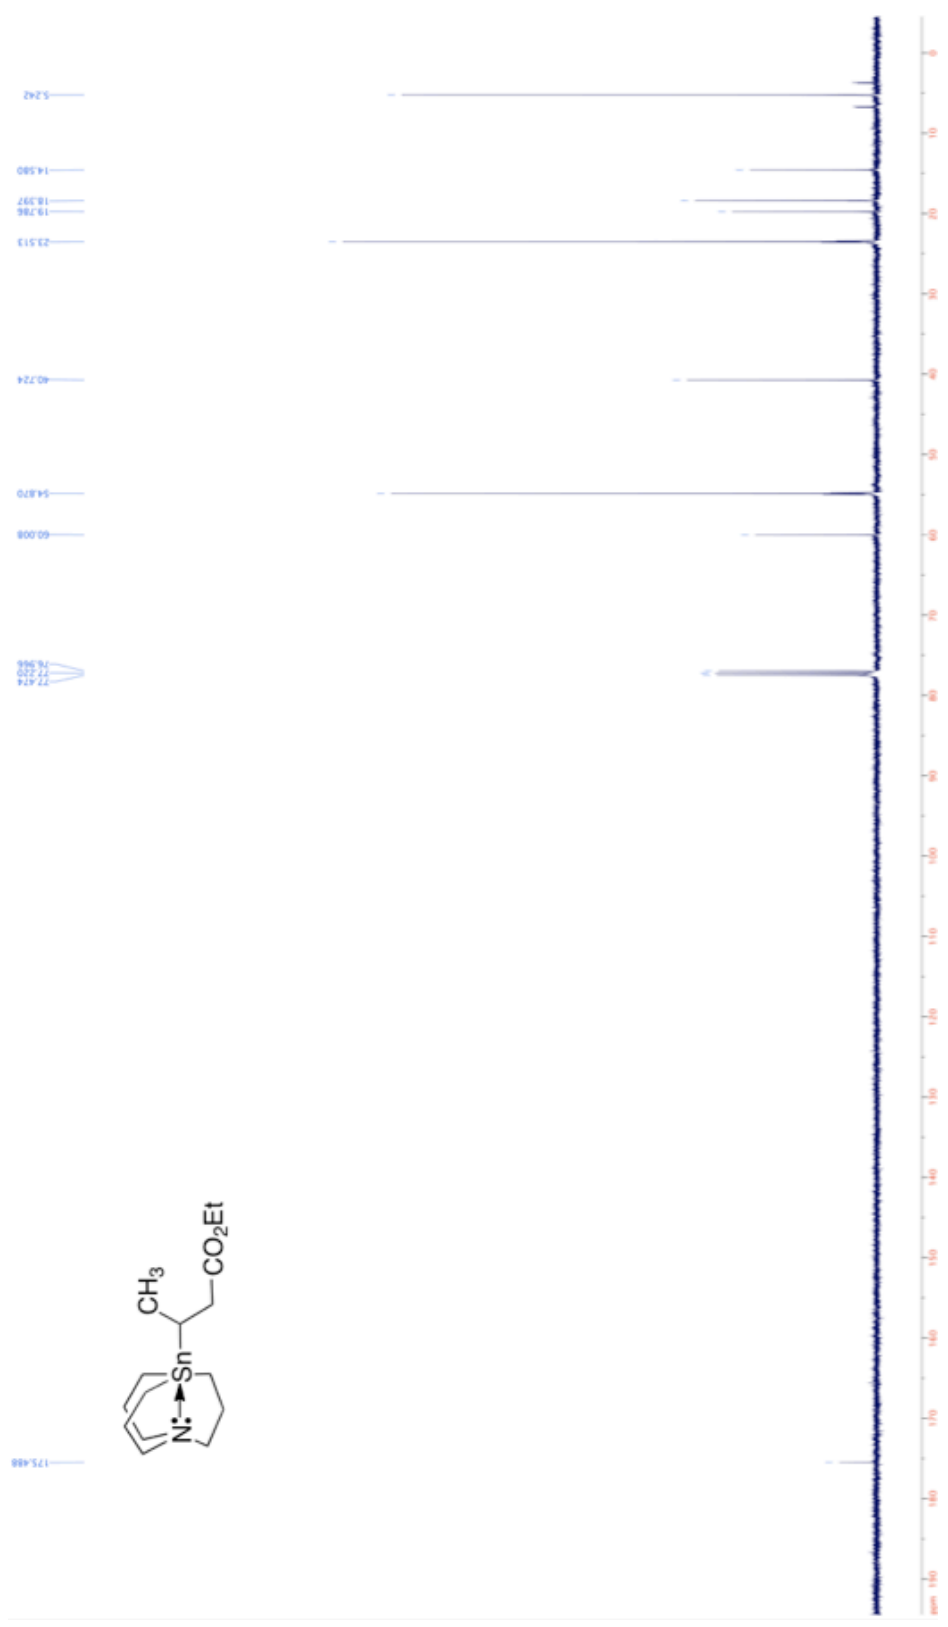



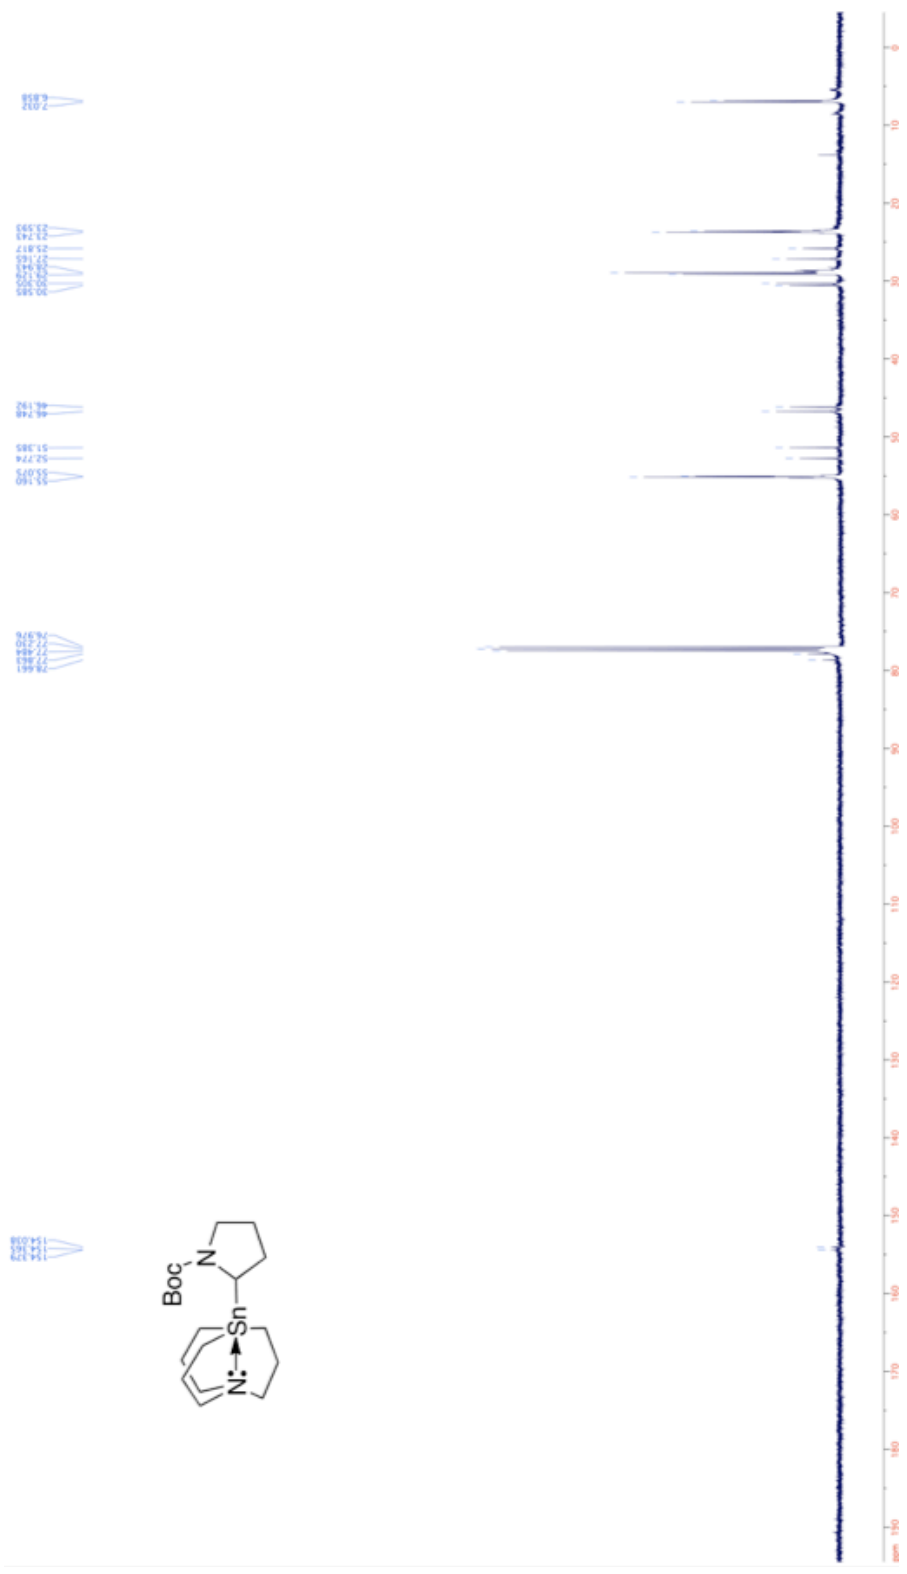



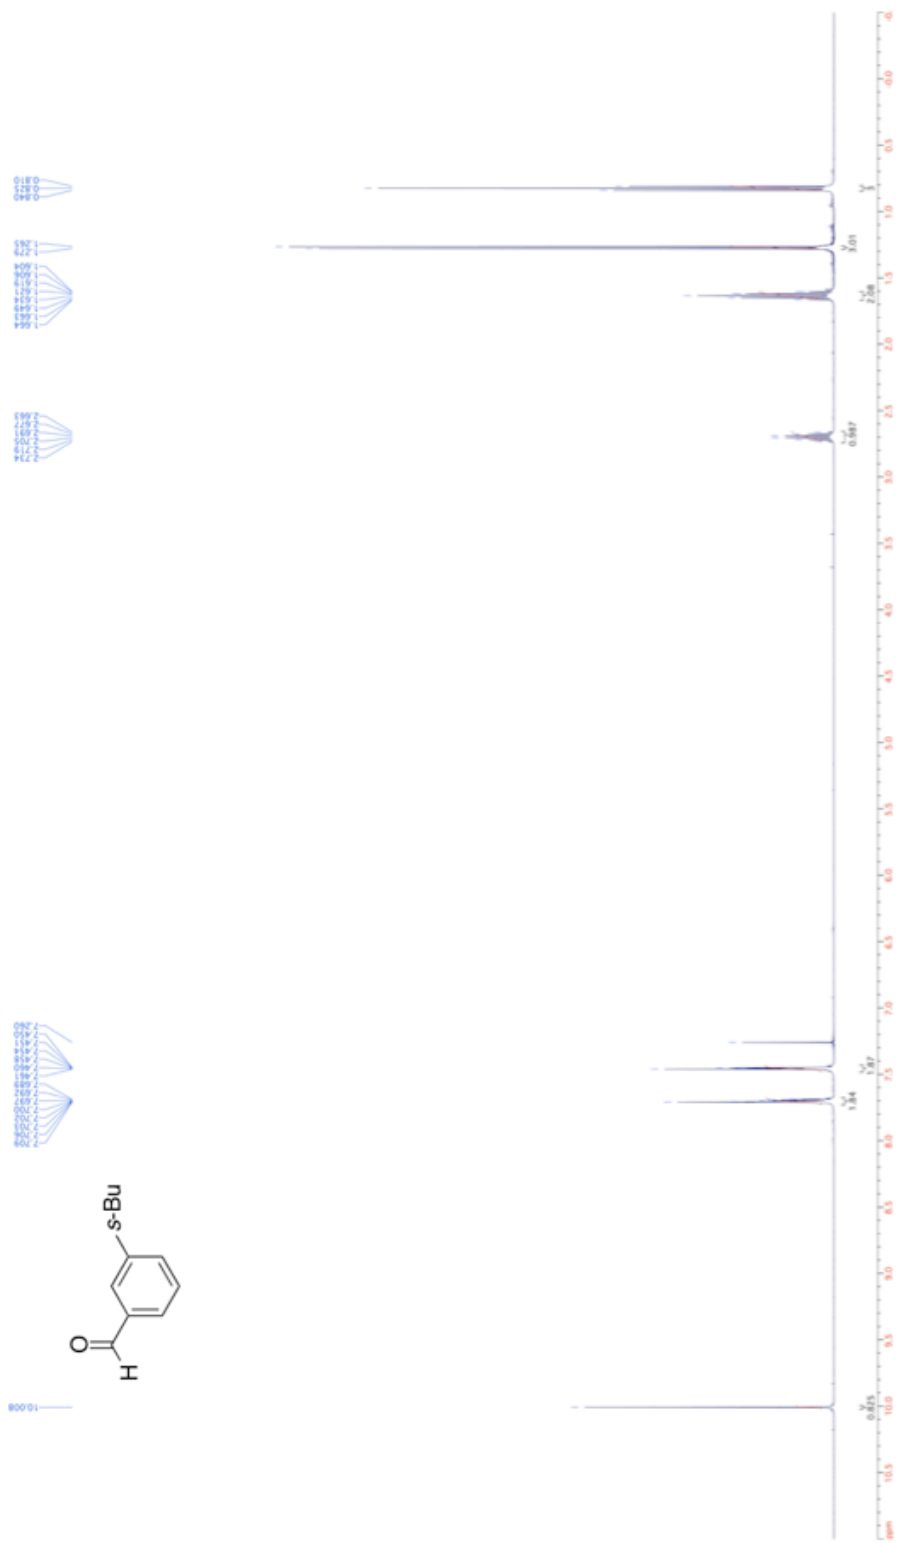

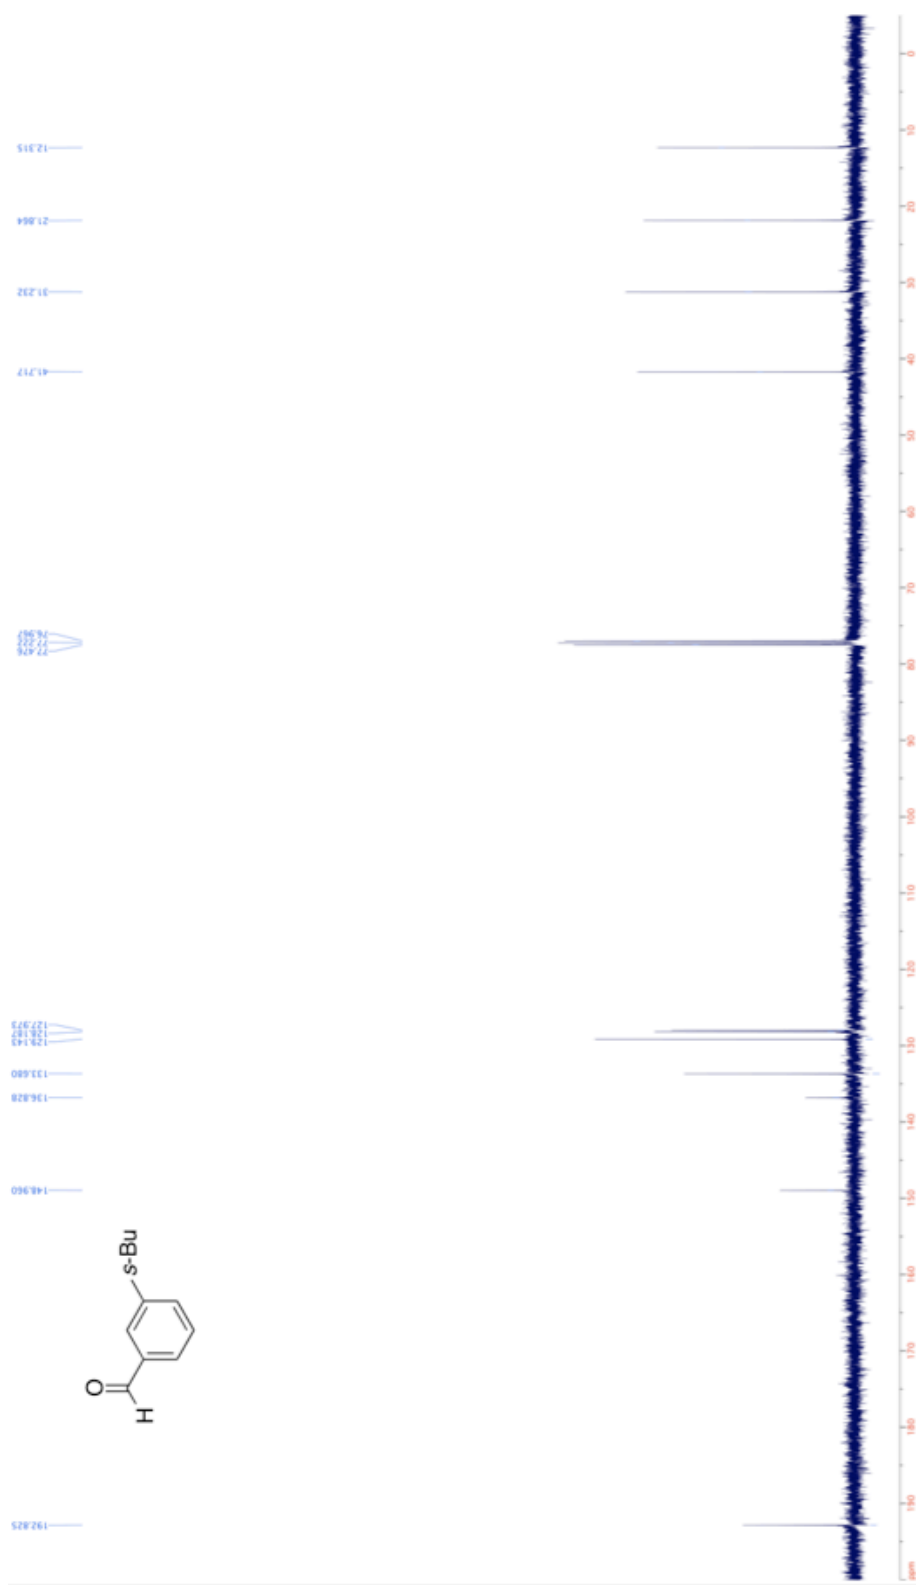



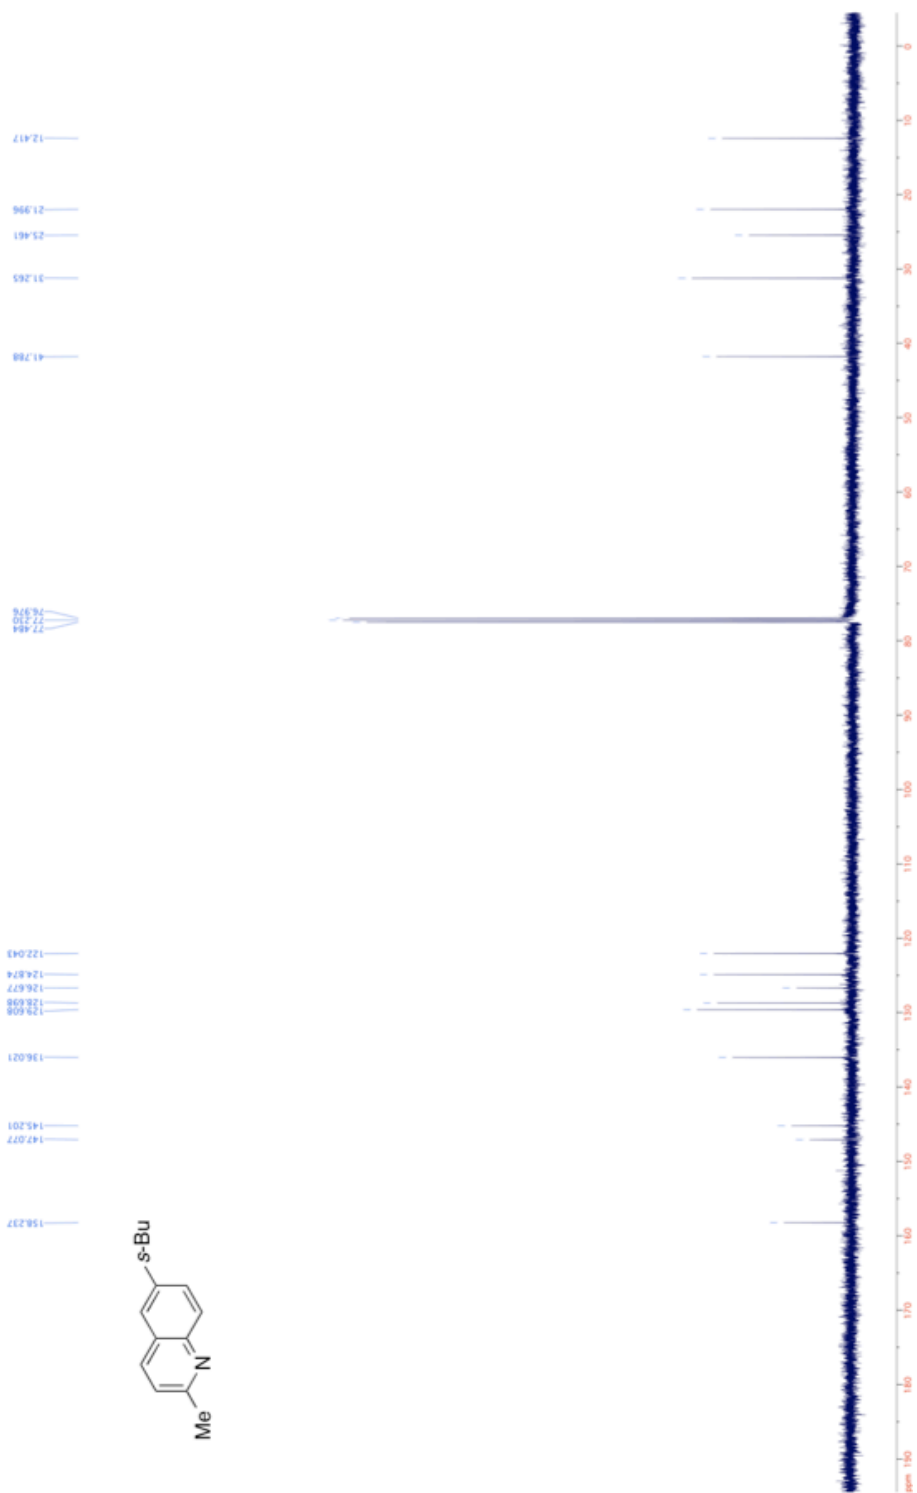



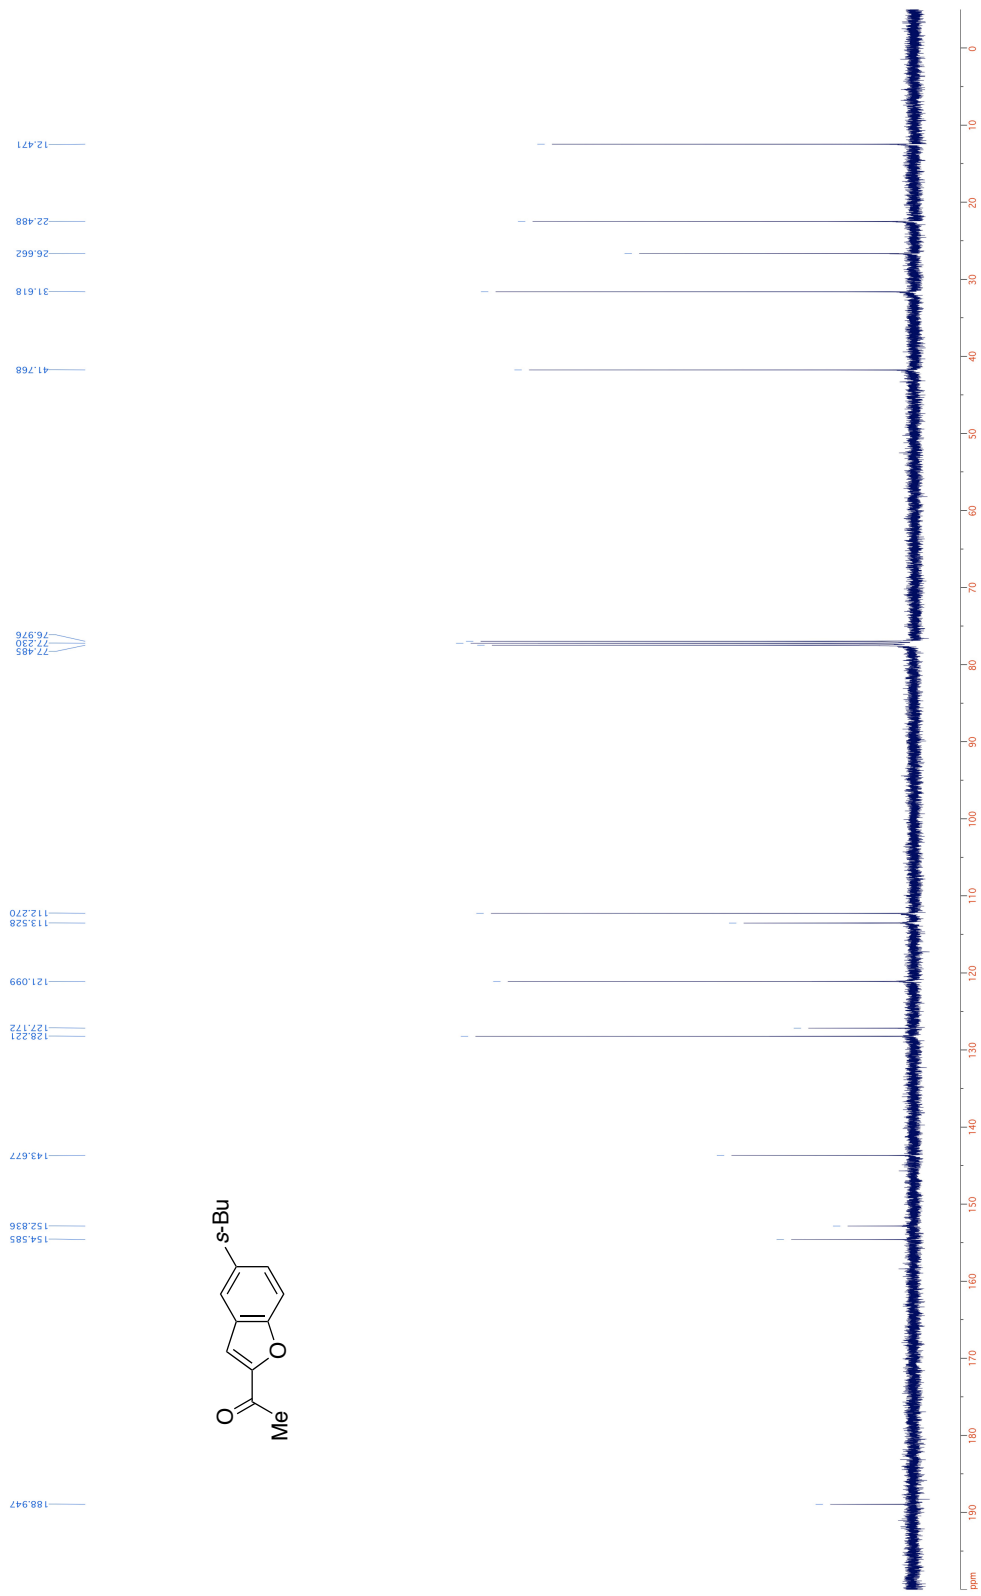



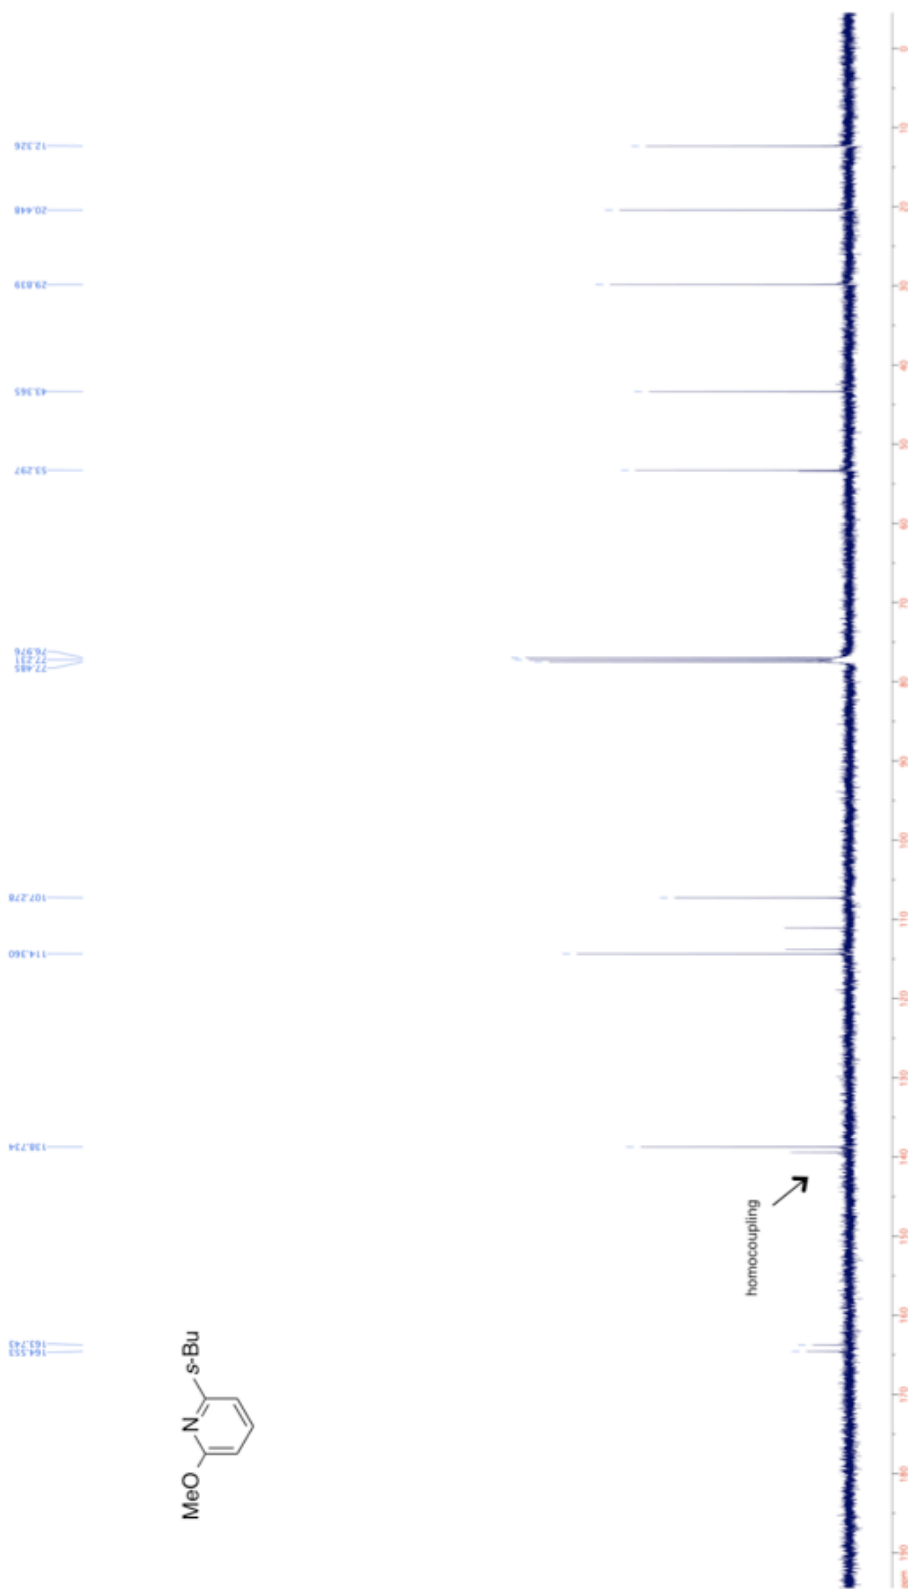



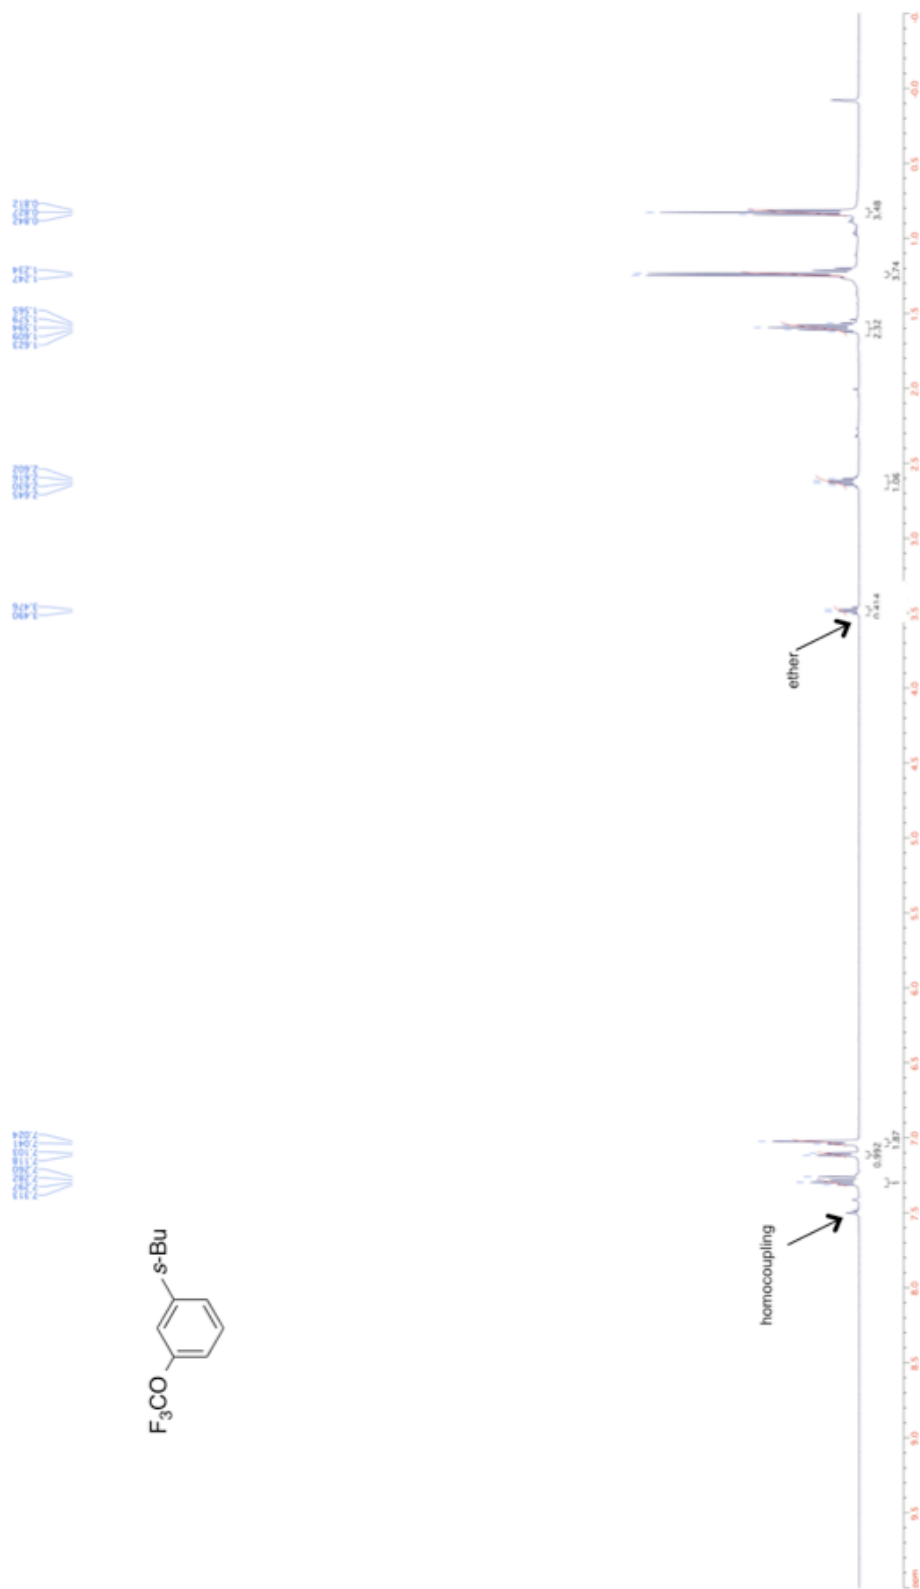

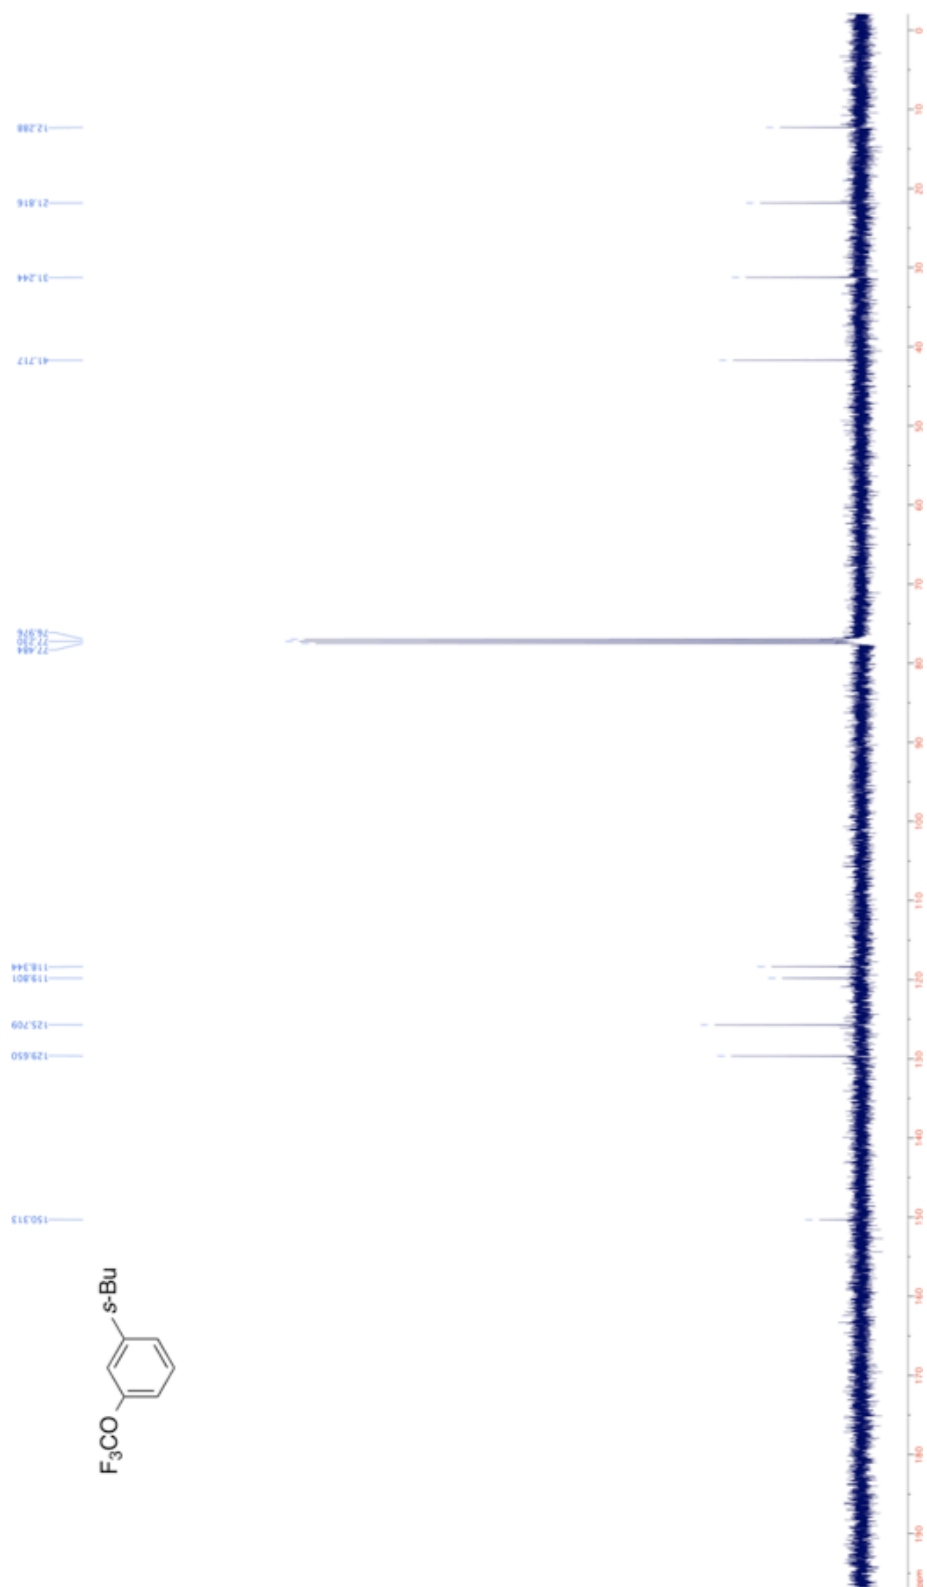

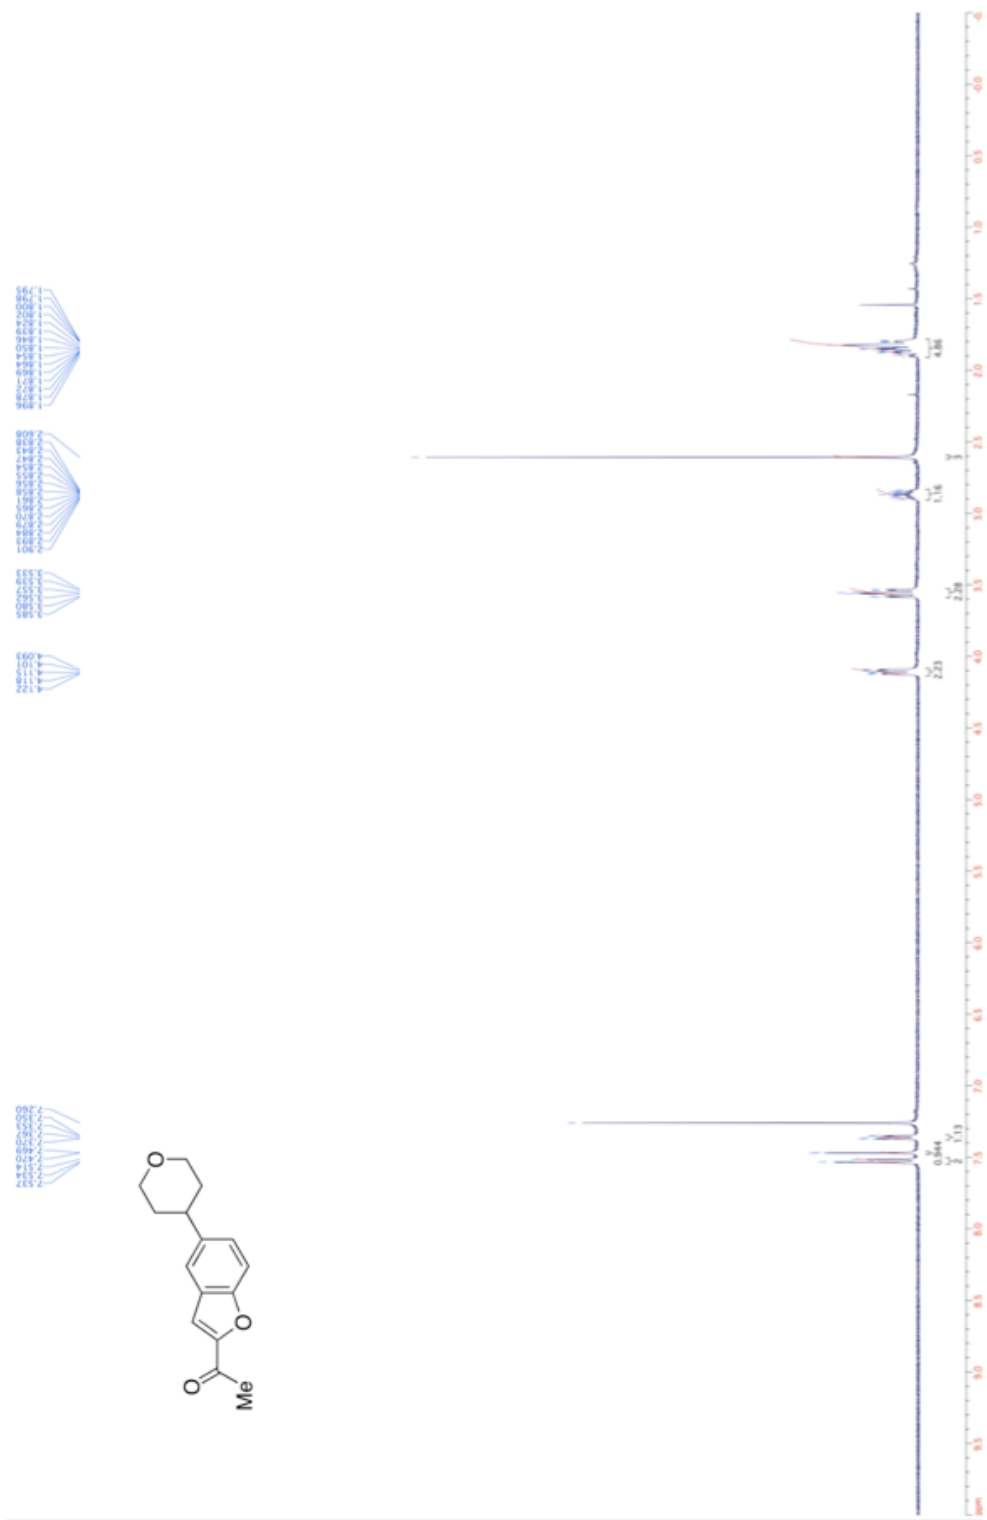

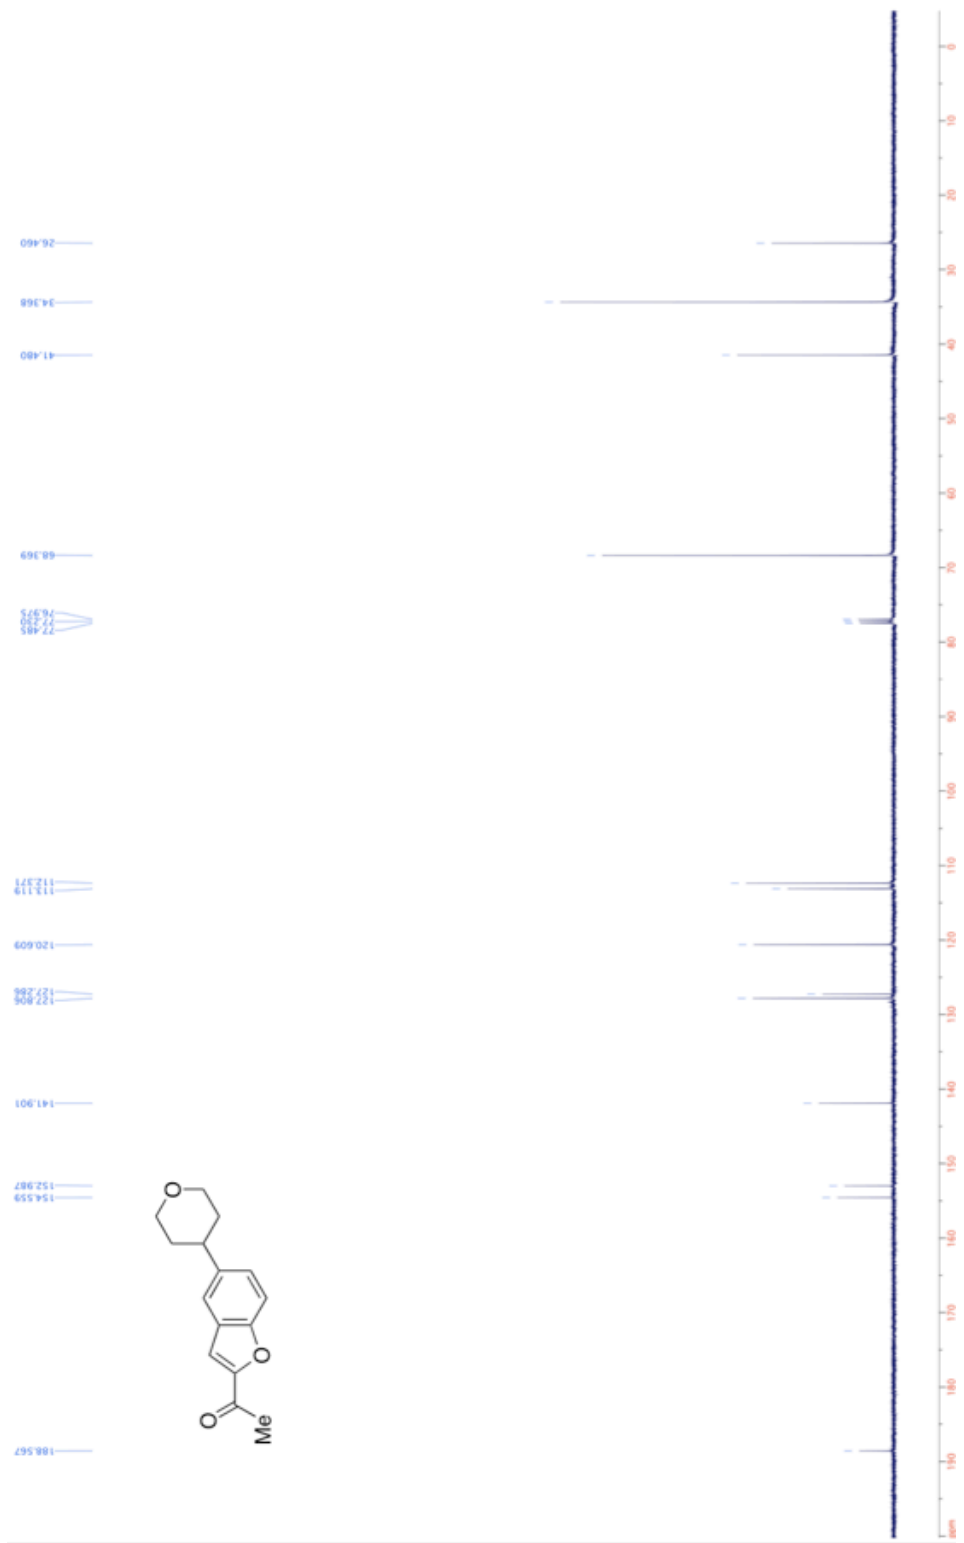

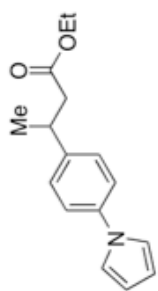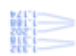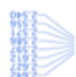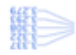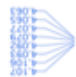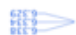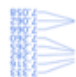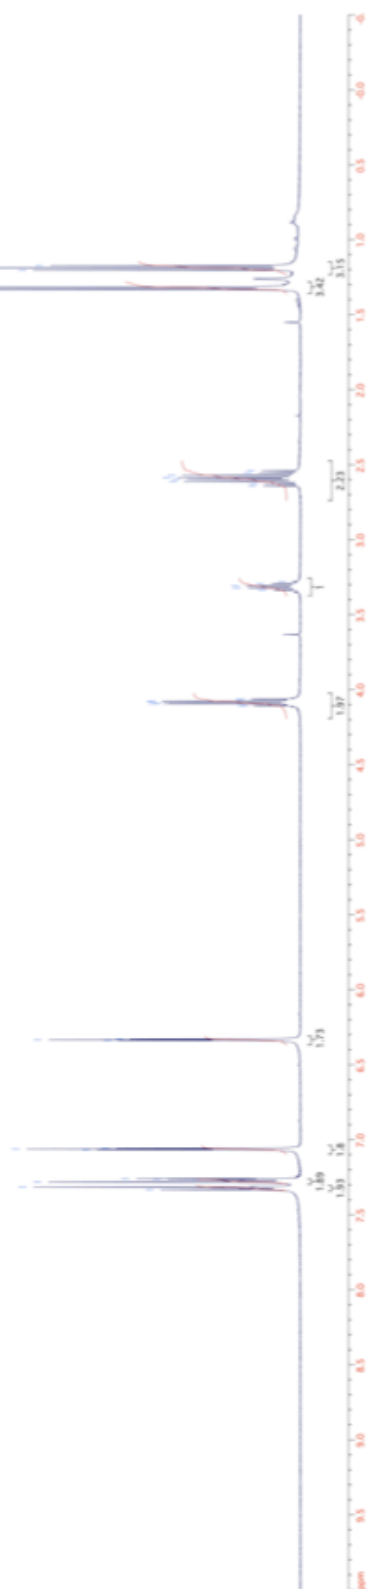

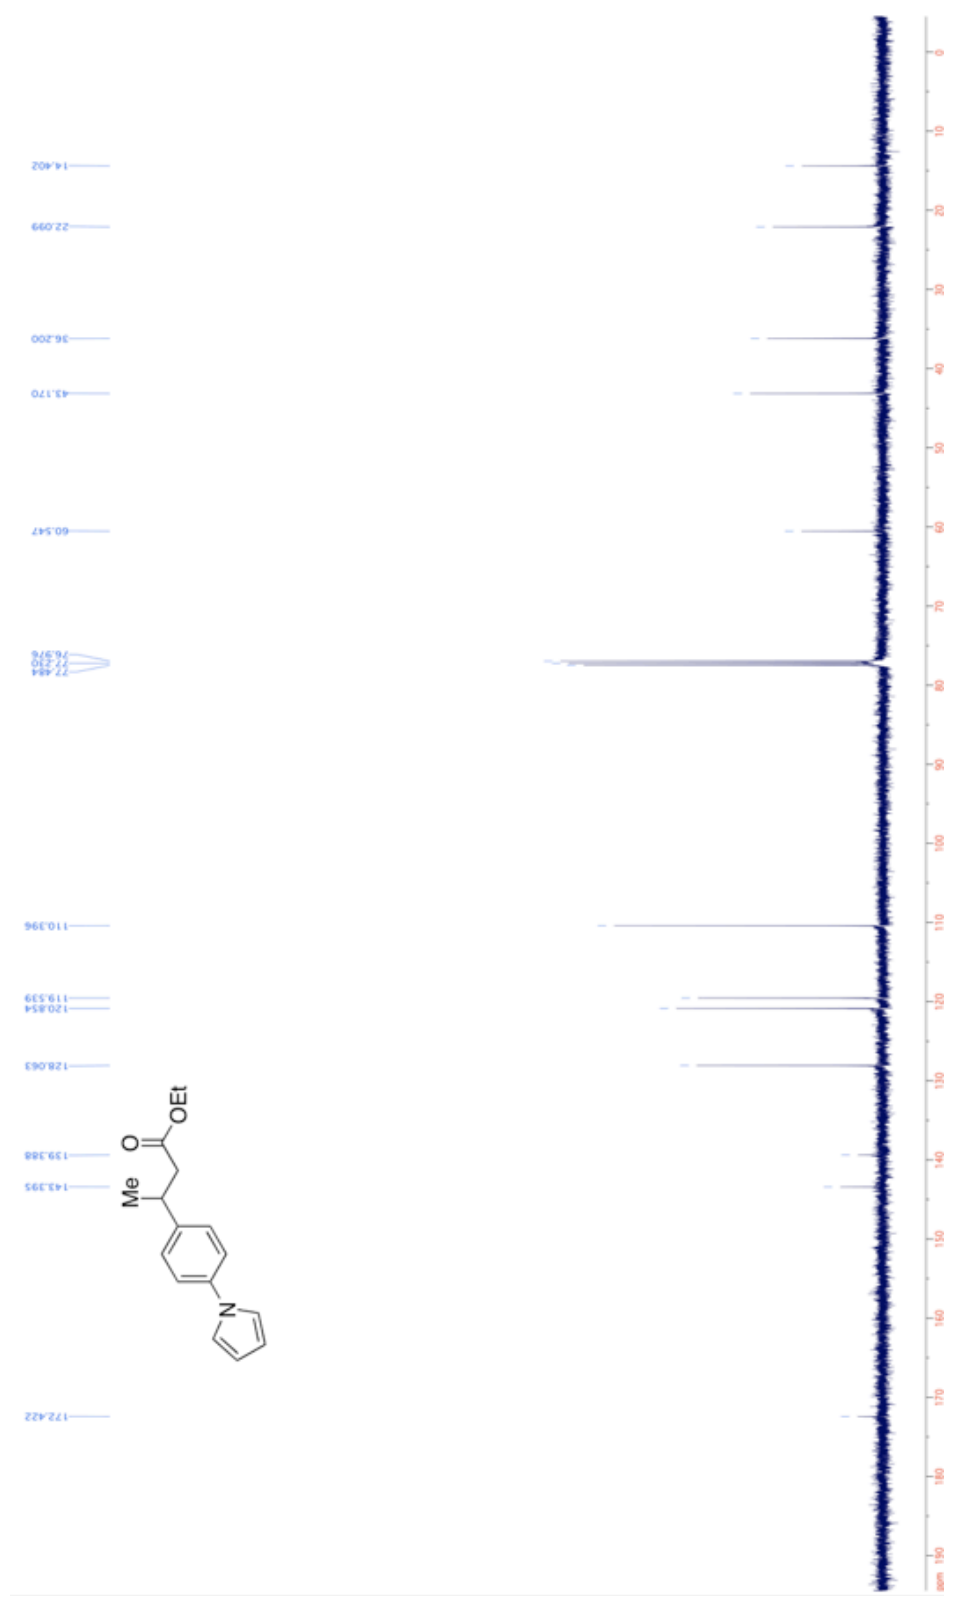

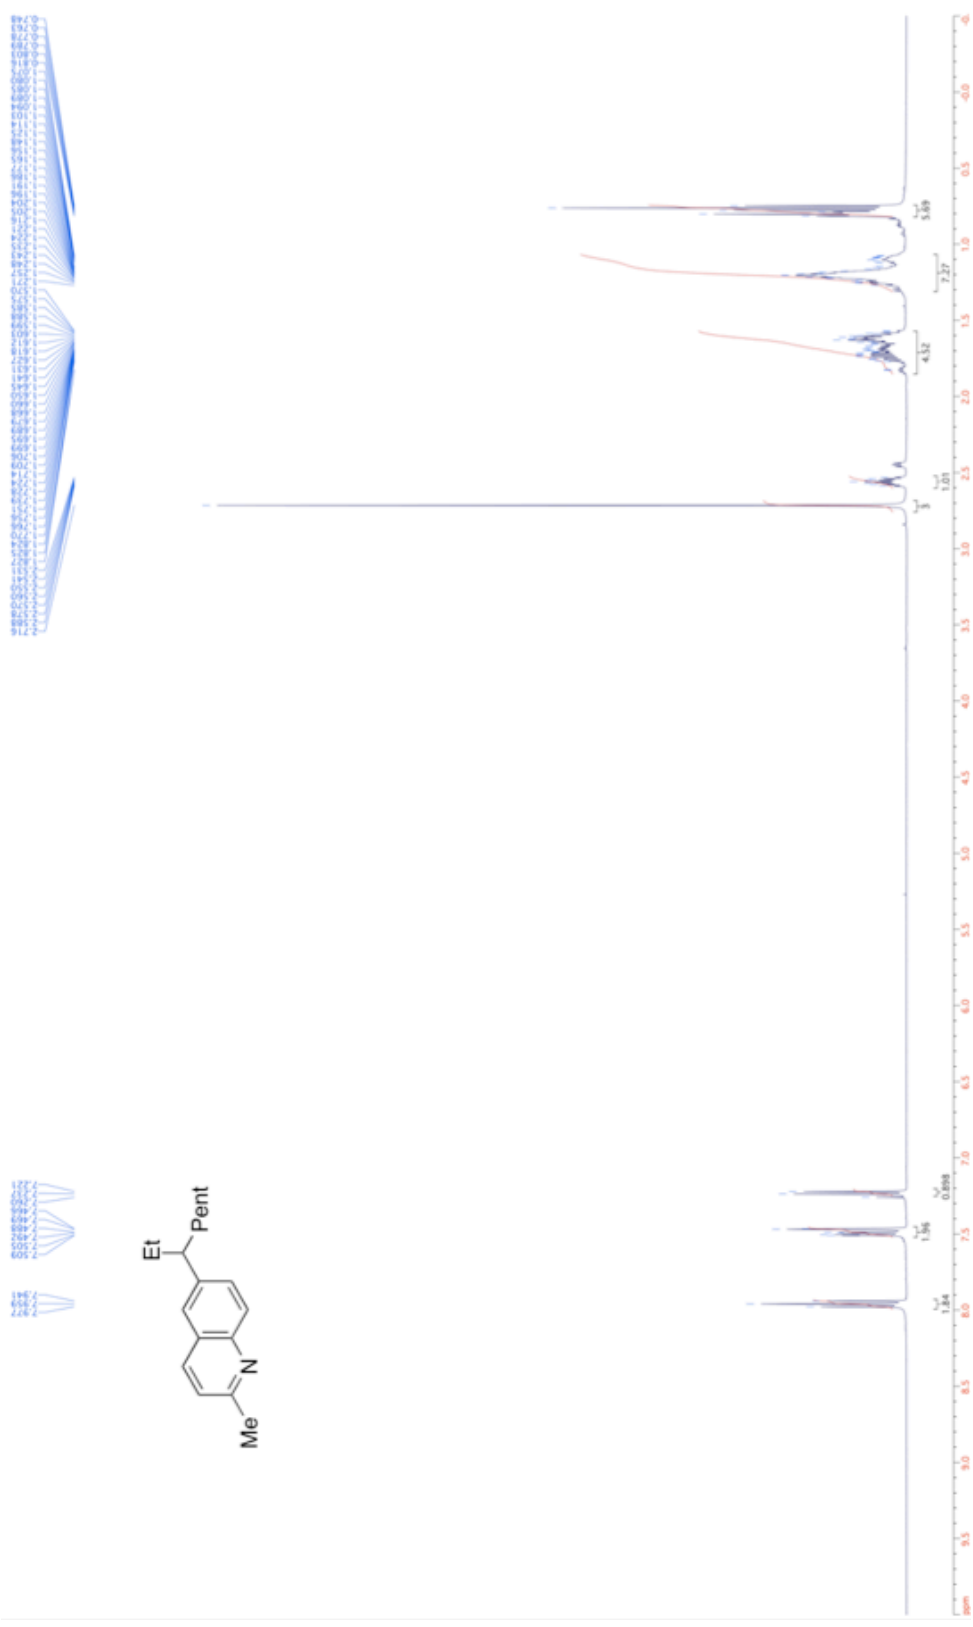

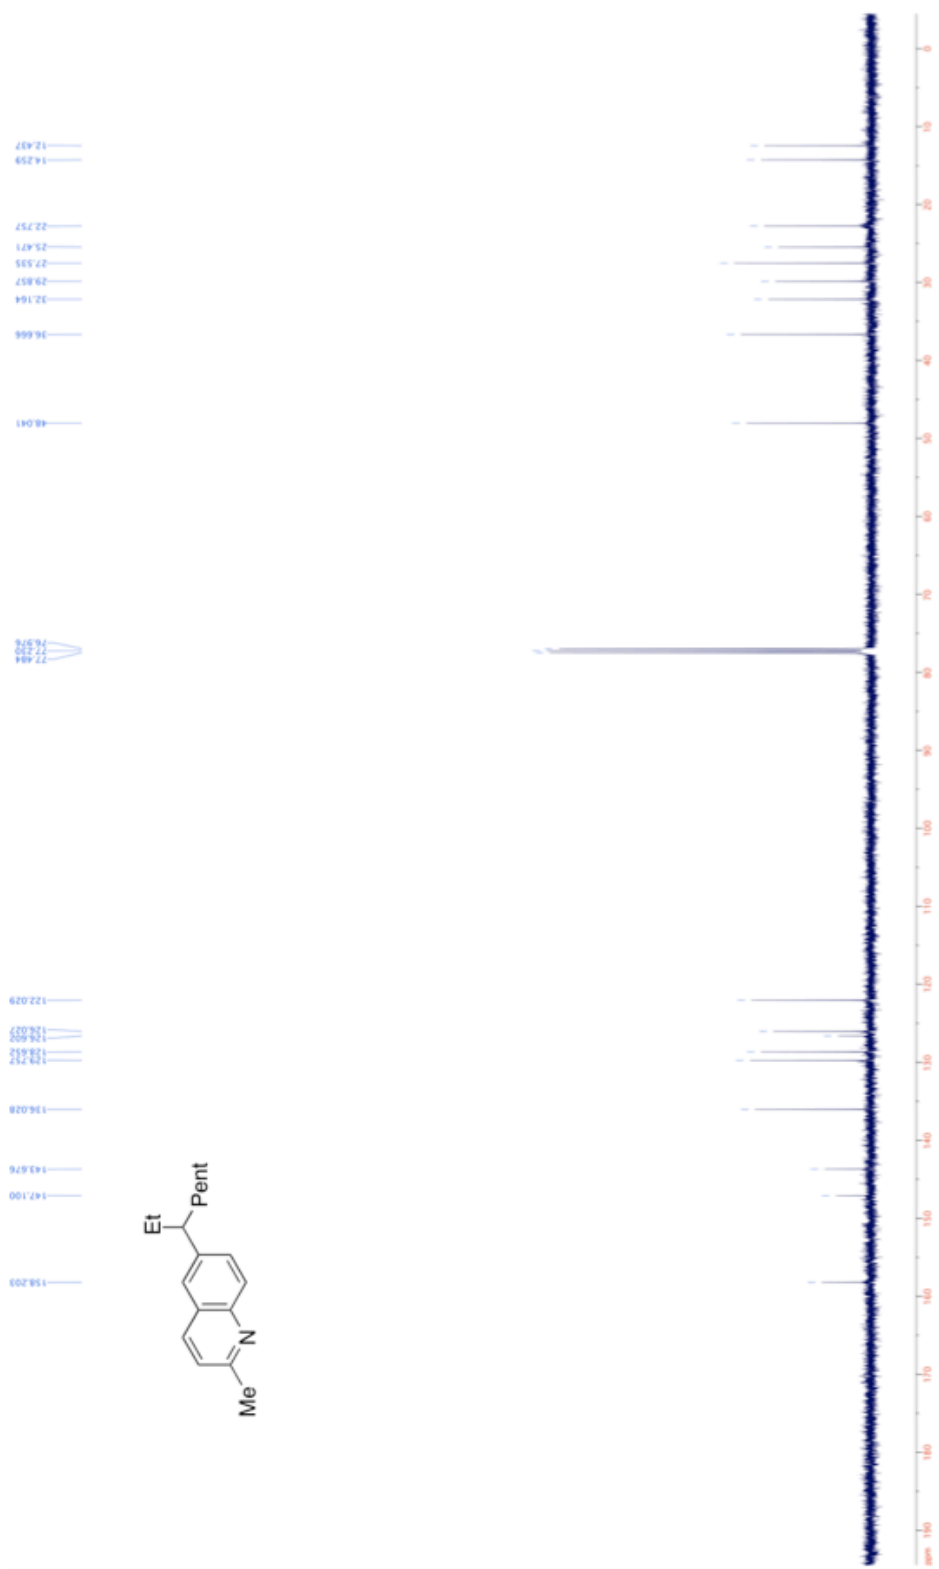



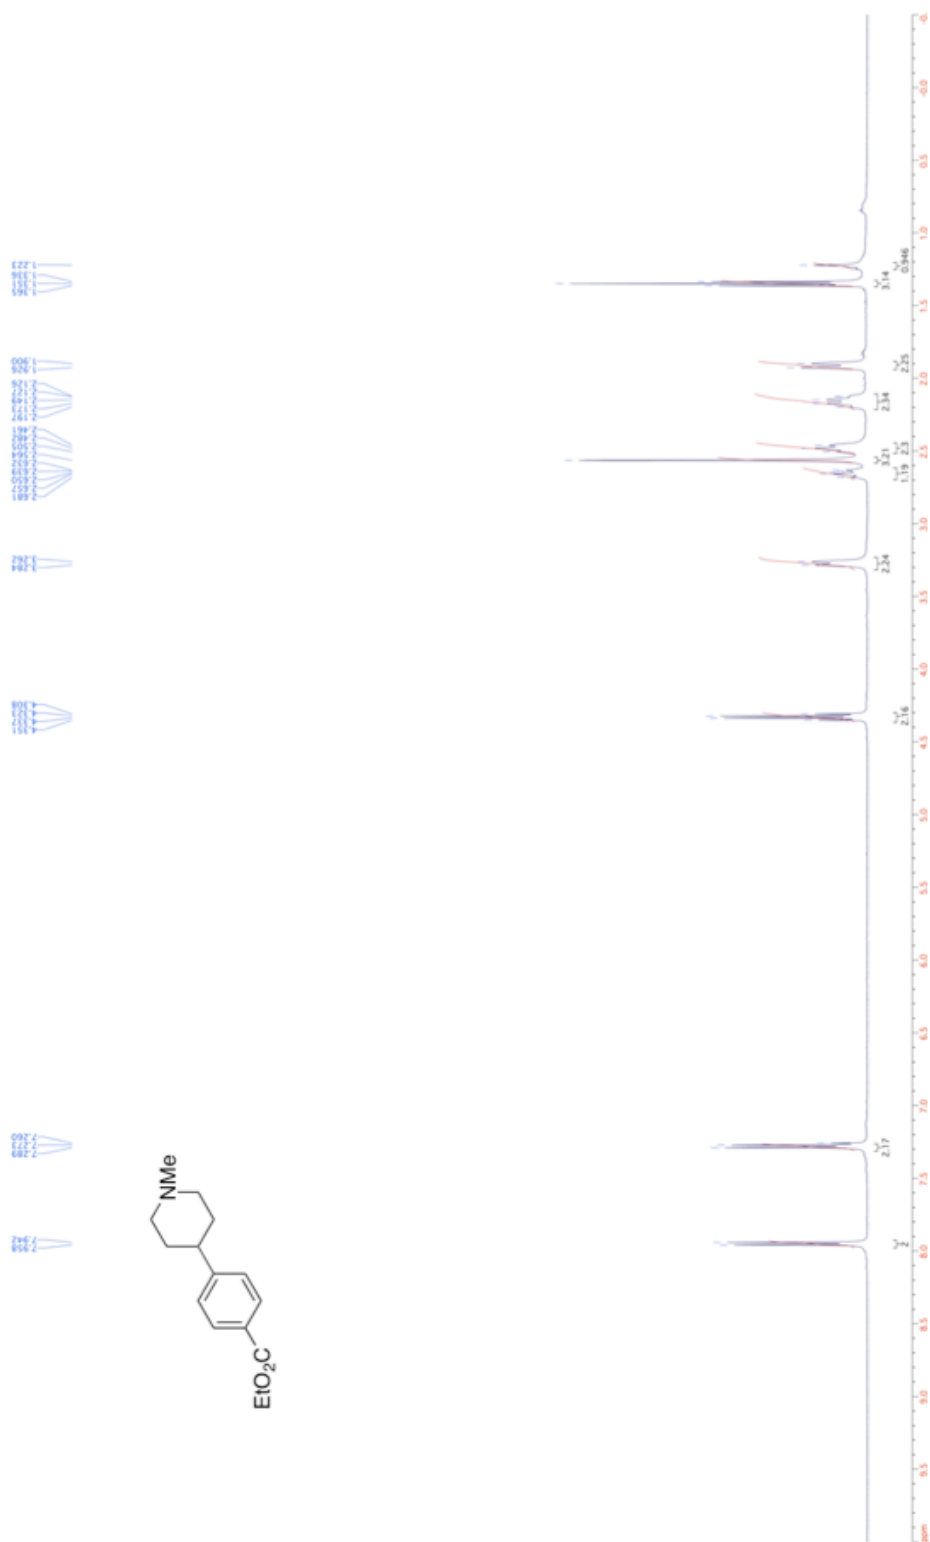

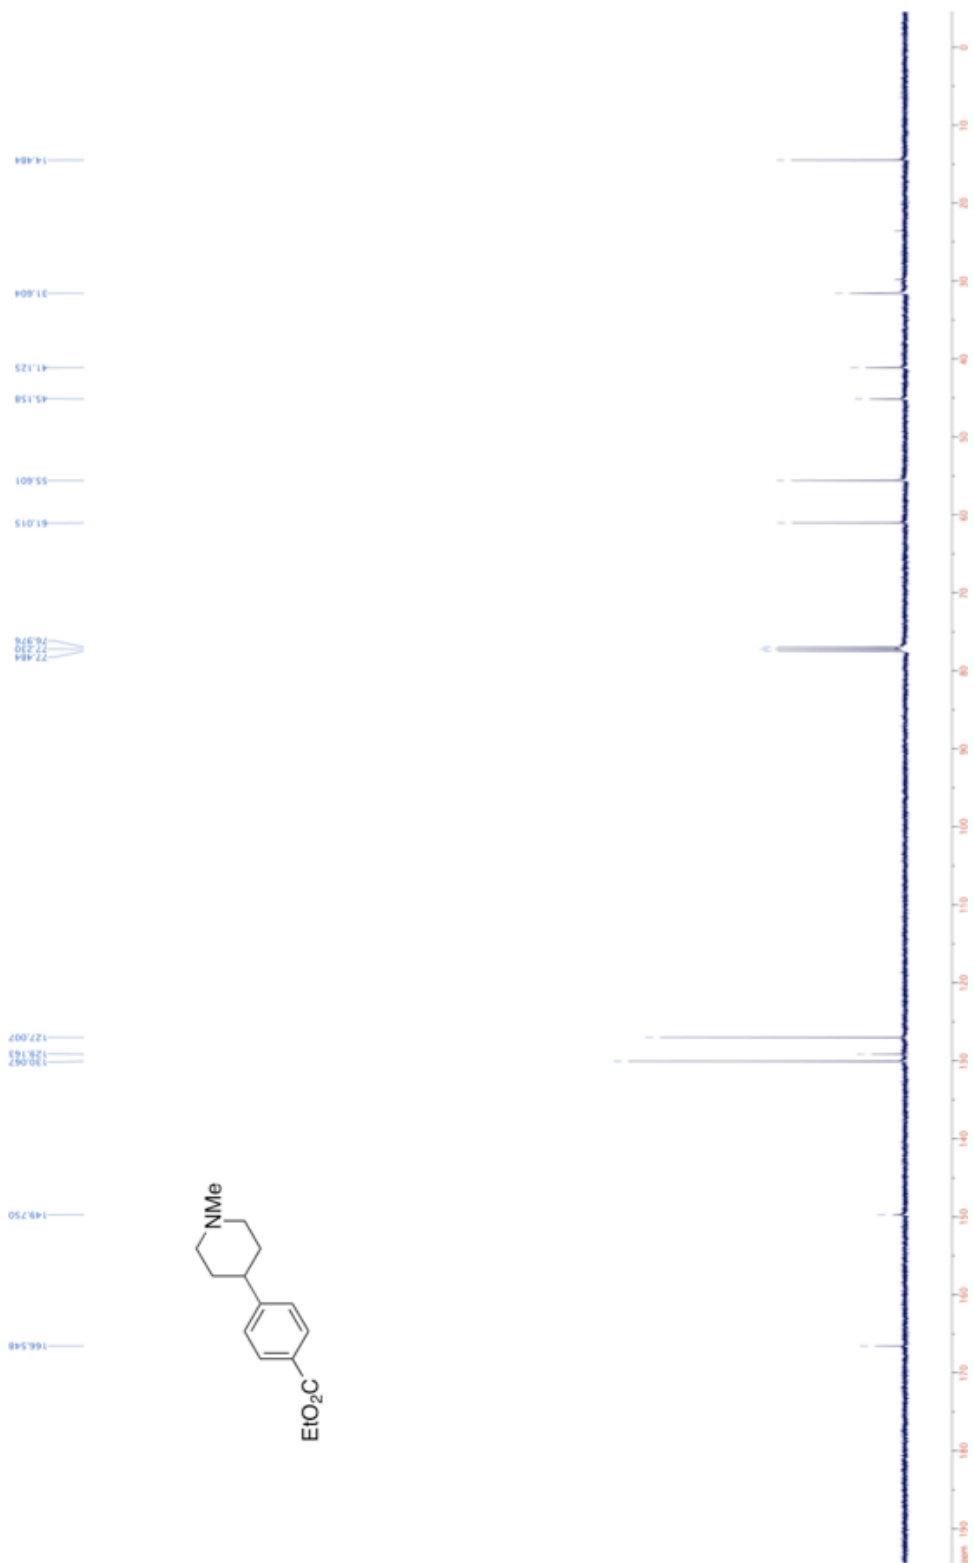

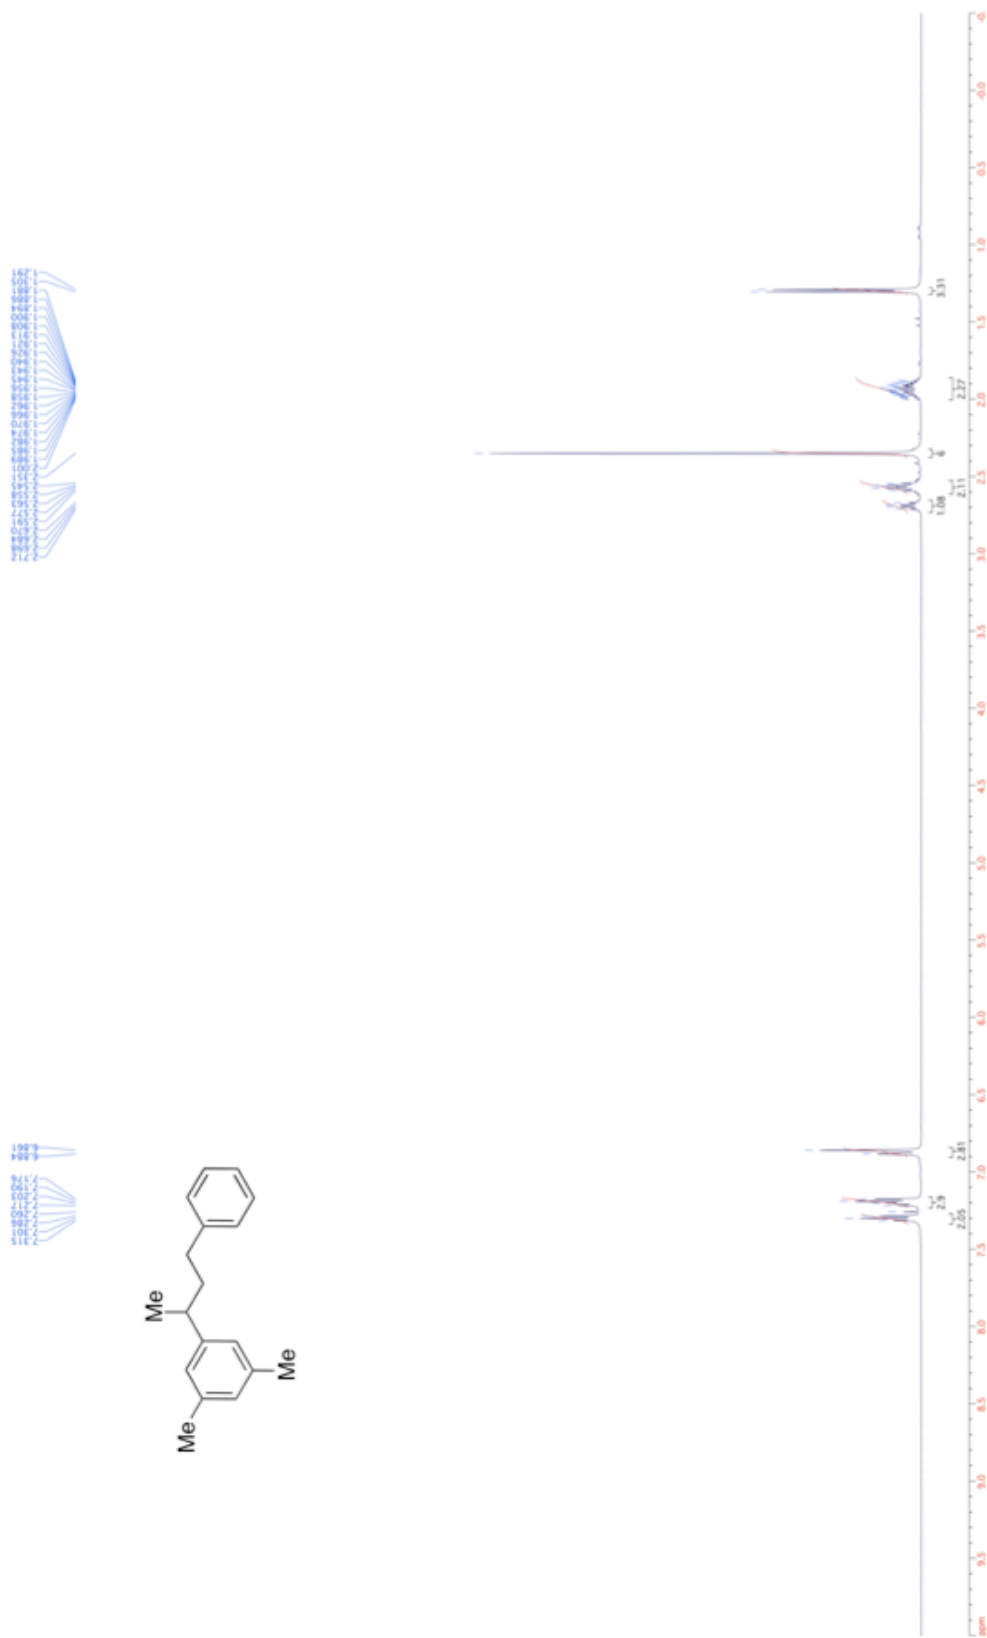

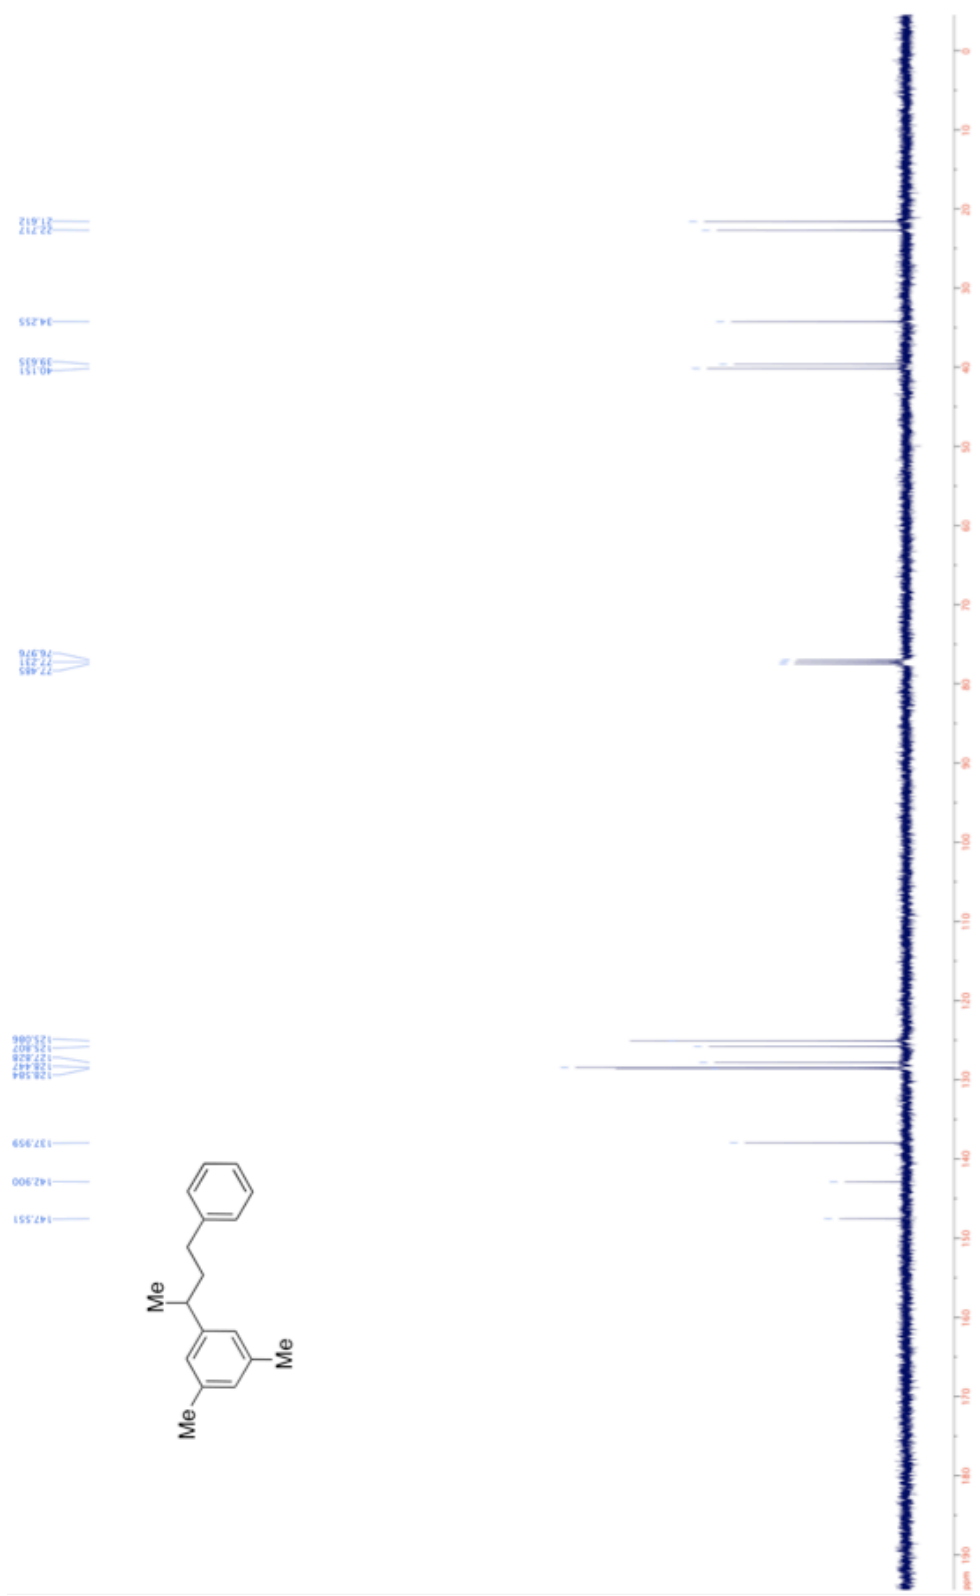

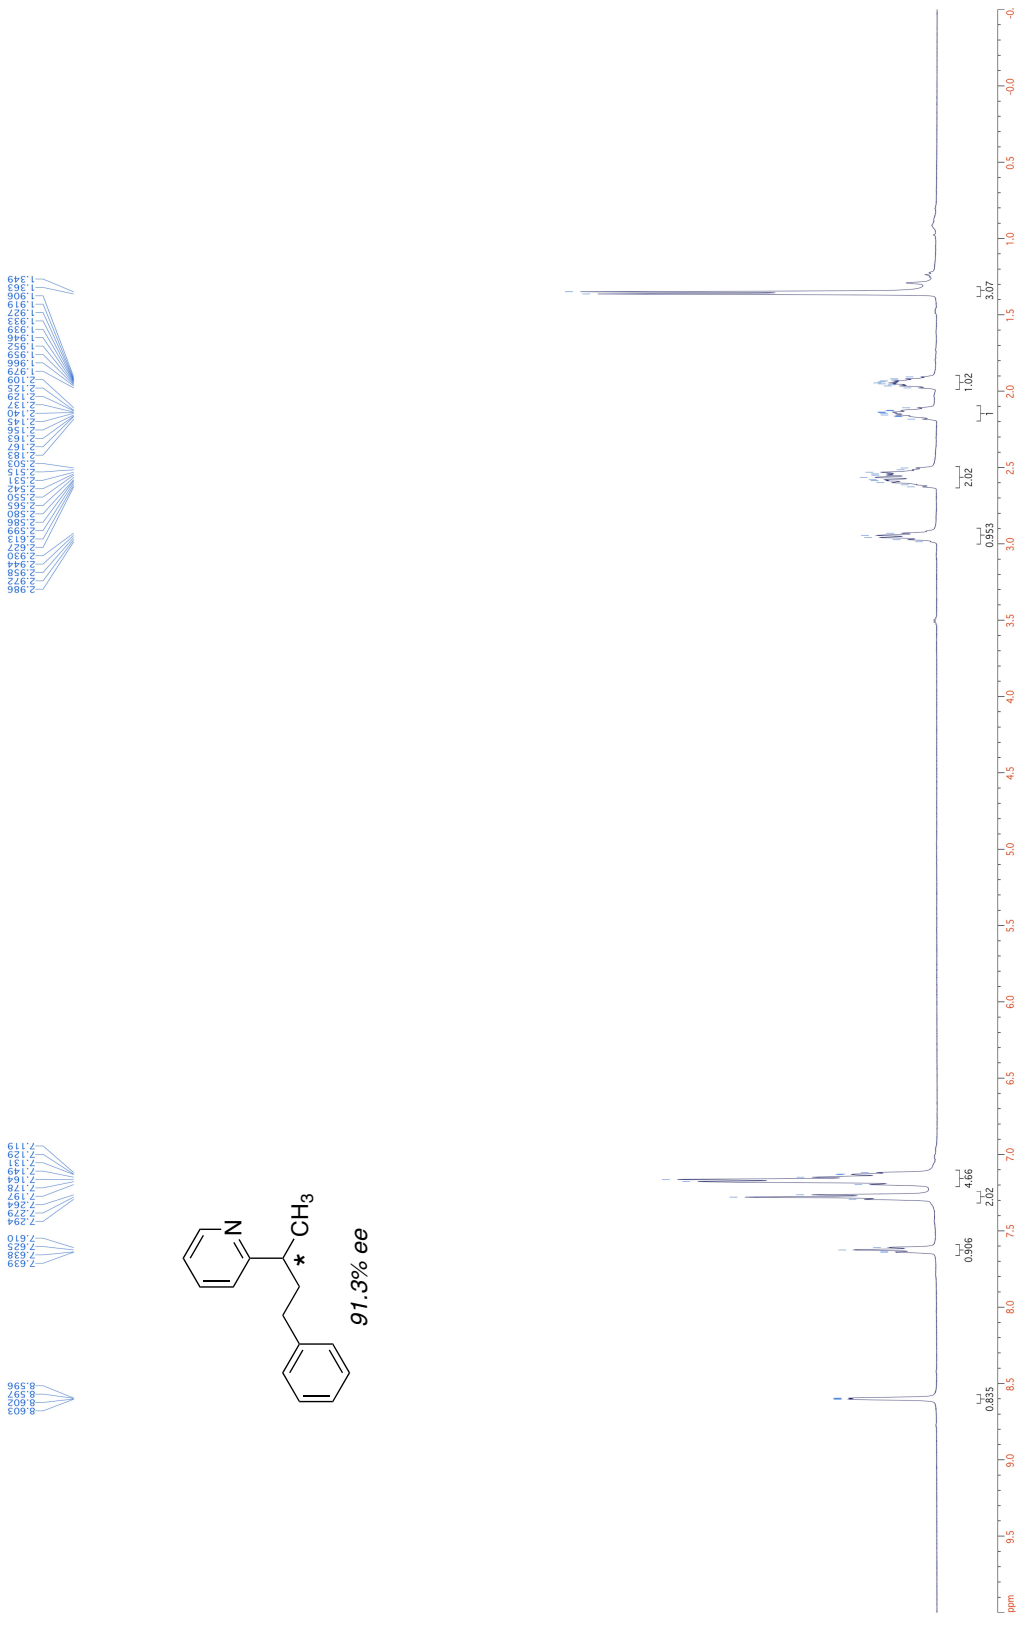

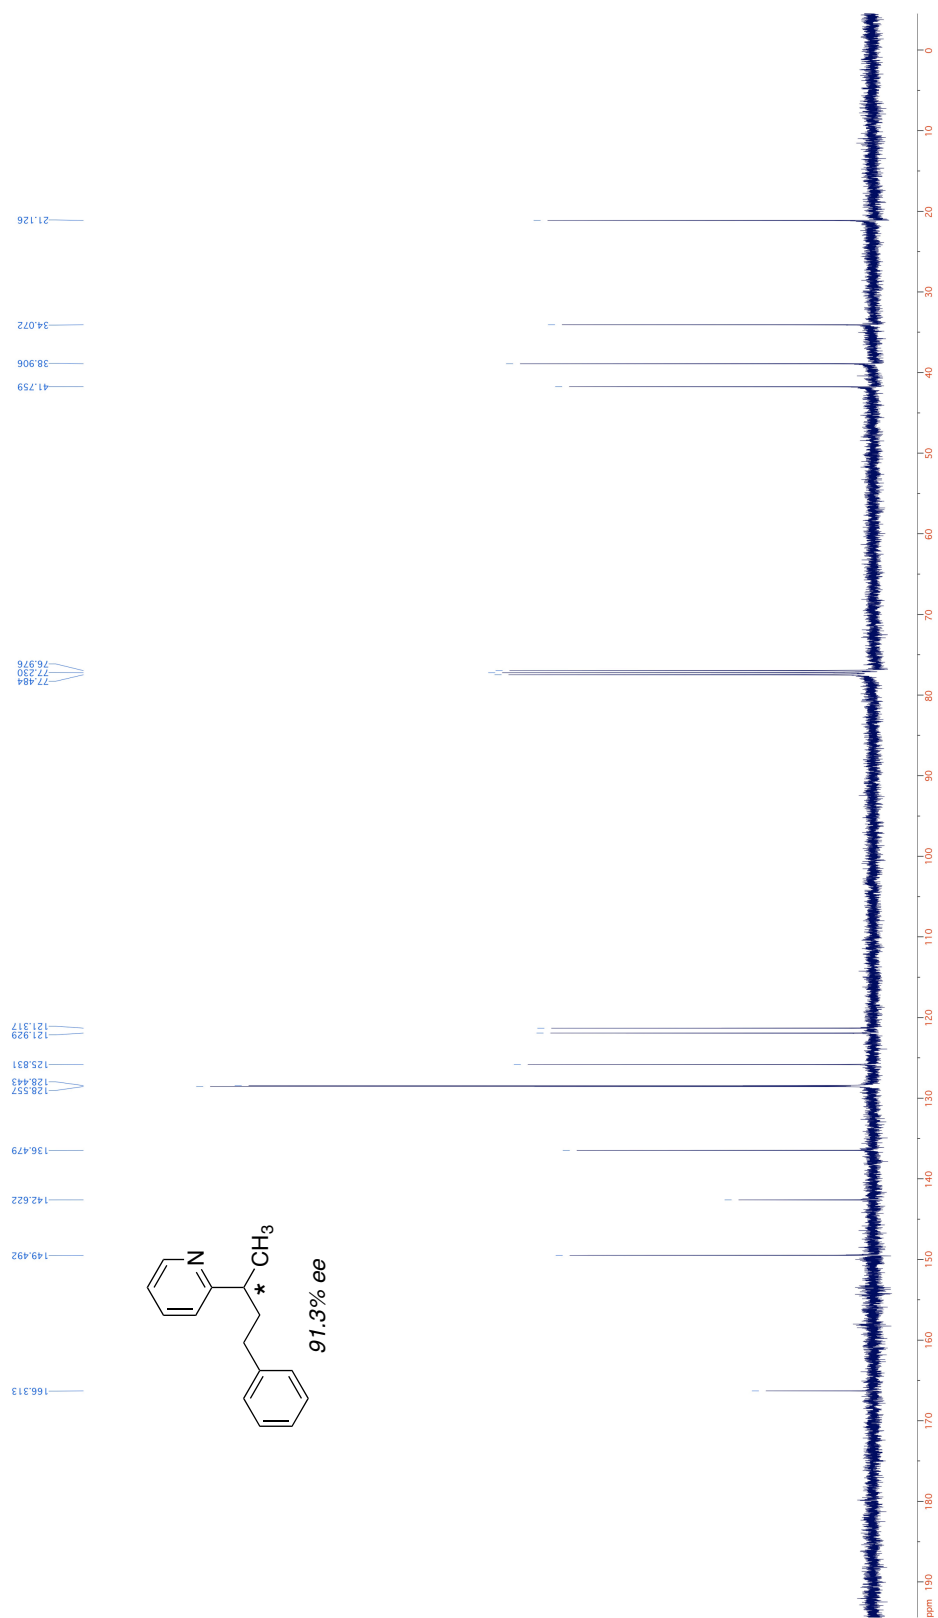

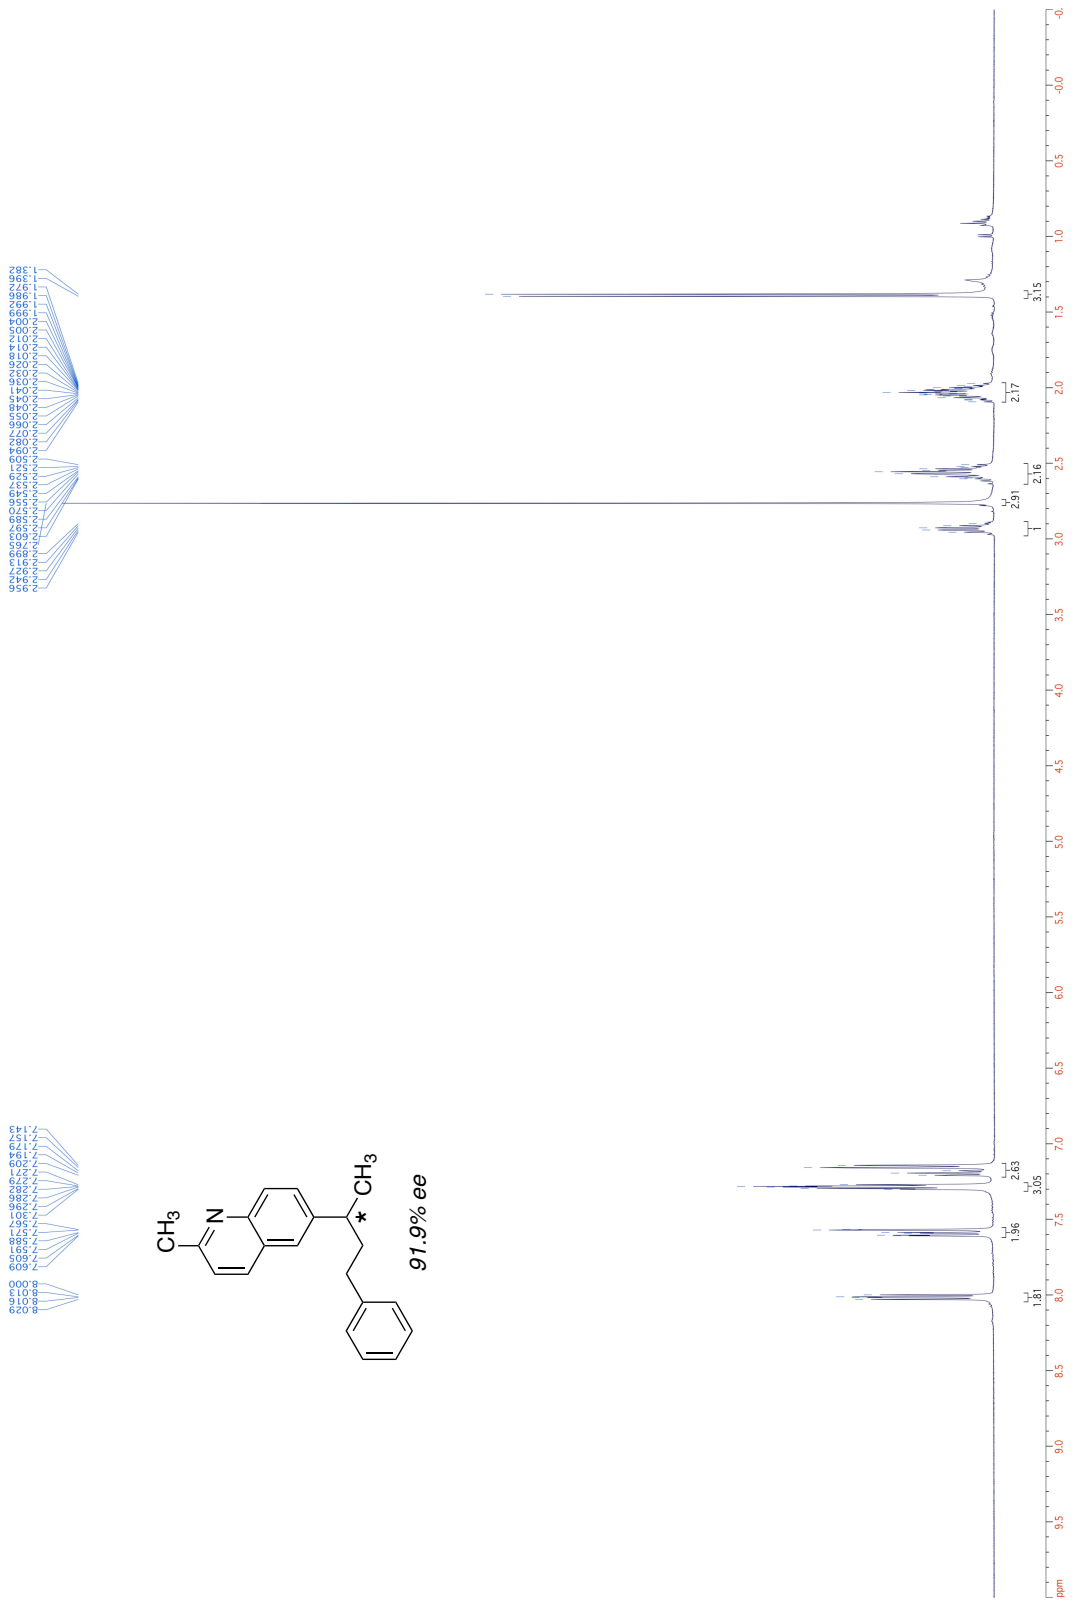

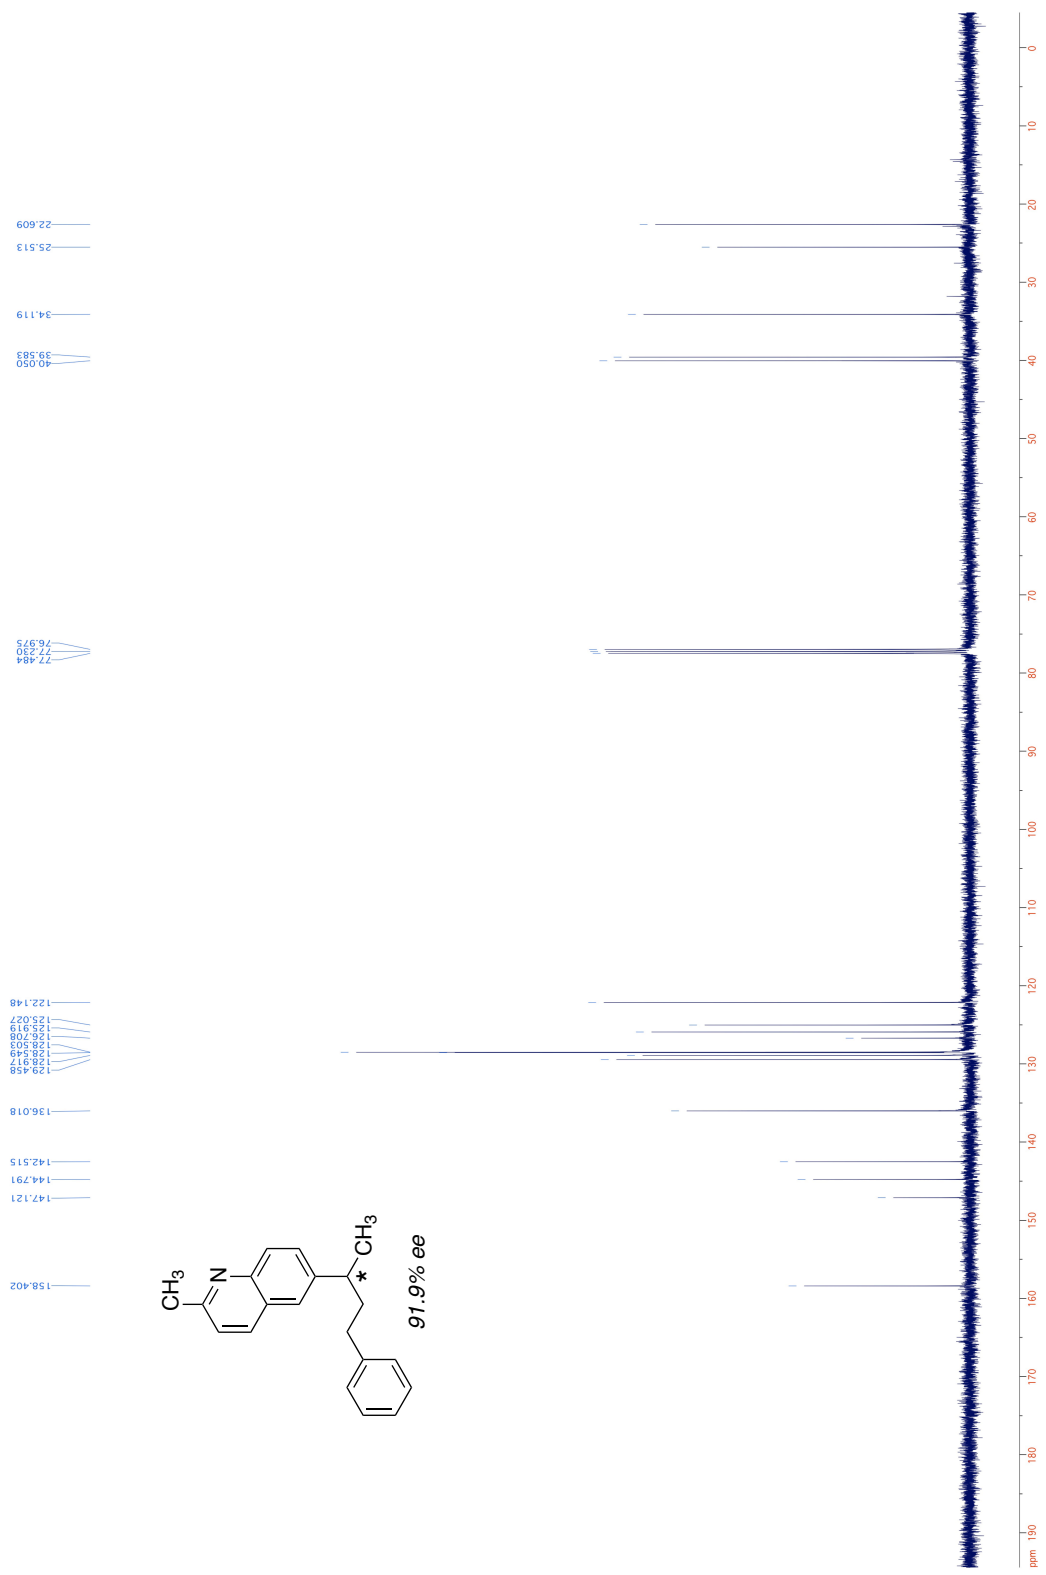

Supplement: NIHMS845308-supplement-SI.pdf [file NIHMS845308-supplement-SI.pdf]
